# Supplementary material
Source: HighWire-hosted journal article supplement (https://bmjopen.bmj.com/content/7/4/e015368)
Supplement: inline-supplementary-material-1 [file inline-supplementary-material-1.pdf]

| <b>Pages</b> | <b>Description</b> |                                                                                                                                                                                                                                                                                                                                                                  |
|--------------|--------------------|------------------------------------------------------------------------------------------------------------------------------------------------------------------------------------------------------------------------------------------------------------------------------------------------------------------------------------------------------------------|
| 2-111        | DX_ICD10CA_ICD9CM  | Conversion table from ICD10CA Diagnostic Codes to ICD9CM Diagnostic Codes                                                                                                                                                                                                                                                                                        |
| 112-179      | SX_CCI_ICD9CM      | Conversion table from CCI Procedure Codes to ICD9CM Procedure Codes                                                                                                                                                                                                                                                                                              |
| 179          | SX_CCP_ICD9CM      | Conversion table from CCP Procedure Codes to ICD9CM Procedure Codes                                                                                                                                                                                                                                                                                              |
| 180-181      | ICD9CM_UPDATES     | Table of ICD9CM Codes that were Revised during the last 25 years                                                                                                                                                                                                                                                                                                 |
|              | <b>Legend</b>      |                                                                                                                                                                                                                                                                                                                                                                  |
|              | Year               | The ICD9CM Code was revised on October 1st of that year                                                                                                                                                                                                                                                                                                          |
|              | Grade              | The grade has values 1-3 and gives an indication of how well the ICD-9-CA code captures the underlying malady relative to the ICD-10-CA code. We take all conversions regardless of grade since the grouper software aggregates the codes to high-level groups and the AHRQ algorithm lists all ICD-9-CM codes related to the specified condition (e.g. trauma). |

| ICD10CA | ICD9CM | GRADE |
|---------|--------|-------|
| F115    | 29211  | 2     |
| F118    | 29289  | 2     |
| F120    | 2922   | 2     |
| F121    | 30520  | 2     |
| F122    | 30430  | 2     |
| F123    | 2920   | 1     |
| F130    | 2922   | 2     |
| F131    | 30540  | 2     |
| F132    | 30410  | 2     |
| F133    | 2920   | 1     |
| F134    | 2920   | 2     |
| F135    | 29211  | 2     |
| F137    | 29289  | 2     |
| F138    | 29289  | 2     |
| F141    | 30560  | 2     |
| F142    | 29211  | 0     |
| F160    | 29212  | 0     |
| F165    | 29211  | 2     |
| F167    | 29212  | 0     |
| F171    | 3051   | 1     |
| F172    | 3051   | 1     |
| F173    | 2920   | 1     |
| F174    | 2920   | 2     |
| F180    | 2922   | 2     |
| F191    | 30590  | 2     |
| F192    | 30490  | 2     |
| F193    | 2920   | 1     |
| F194    | 2920   | 2     |
| F198    | 29289  | 2     |
| F199    | 2929   | 1     |
| F200    | 29530  | 2     |
| F202    | 29520  | 2     |
| F203    | 29580  | 2     |
| F205    | 29560  | 2     |
| F206    | 29500  | 0     |
| F208    | 29580  | 2     |
| F209    | 29590  | 2     |
| F21     | 29550  | 2     |
| F220    | 2971   | 2     |
| F228    | 2978   | 2     |
| F229    | 2979   | 0     |
| F233    | 2984   | 2     |
| F238    | 2988   | 1     |

| <b>ICD10CA</b> | <b>ICD9CM</b> | <b>GRADE</b> |
|----------------|---------------|--------------|
| F239           | 2988          | 2            |
| F250           | 29570         | 2            |
| F251           | 29570         | 2            |
| F252           | 29570         | 2            |
| F258           | 29570         | 2            |
| F259           | 29570         | 2            |
| F28            | 2988          | 2            |
| F29            | 2989          | 1            |
| F300           | 29600         | 2            |
| F308           | 29600         | 2            |
| F309           | 29600         | 2            |
| F310           | 29640         | 2            |
| F311           | 29640         | 2            |
| F312           | 29640         | 2            |
| F313           | 29651         | 2            |
| F314           | 29653         | 2            |
| F315           | 29653         | 2            |
| F316           | 29660         | 2            |
| F317           | 2967          | 1            |
| F318           | 29689         | 2            |
| F319           | 2967          | 1            |
| F320           | 3004          | 1            |
| F321           | 2980          | 1            |
| F322           | 29623         | 2            |
| F323           | 29624         | 2            |
| F328           | 29620         | 2            |
| F329           | 311           | 1            |
| F330           | 29631         | 2            |
| F331           | 29632         | 1            |
| F332           | 29633         | 1            |
| F333           | 29634         | 2            |
| F334           | 29636         | 2            |
| F338           | 29630         | 2            |
| F339           | 29630         | 2            |
| F341           | 3004          | 1            |
| F349           | 29690         | 2            |
| F388           | 29699         | 2            |
| F39            | 29690         | 1            |
| F400           | 30022         | 2            |
| F401           | 30023         | 1            |
| F402           | 30029         | 1            |
| F409           | 30020         | 1            |
| F410           | 30001         | 1            |

| ICD10CA | ICD9CM | GRADE |
|---------|--------|-------|
| F411    | 30002  | 1     |
| F412    | 3004   | 2     |
| F413    | 30009  | 1     |
| F418    | 30009  | 1     |
| F419    | 30000  | 1     |
| F421    | 3003   | 0     |
| F429    | 3003   | 1     |
| F430    | 3083   | 1     |
| F431    | 30981  | 1     |
| F432    | 3090   | 2     |
| F438    | 30989  | 0     |
| F439    | 3089   | 1     |
| F440    | 30012  | 1     |
| F444    | 30011  | 1     |
| F448    | 30014  | 1     |
| F449    | 30015  | 1     |
| F452    | 3007   | 0     |
| F453    | 30089  | 0     |
| F454    | 30789  | 2     |
| F458    | 3068   | 2     |
| F459    | 3069   | 2     |
| F480    | 3005   | 0     |
| F488    | 30089  | 1     |
| F489    | 3009   | 0     |
| F500    | 3071   | 1     |
| F502    | 30751  | 1     |
| F508    | 30759  | 2     |
| F509    | 30750  | 1     |
| F510    | 30742  | 2     |
| F513    | 30746  | 1     |
| F514    | 30746  | 1     |
| F515    | 30747  | 1     |
| F519    | 30740  | 1     |
| F54     | 316    | 1     |
| F55     | 30590  | 2     |
| F600    | 3010   | 1     |
| F601    | 30120  | 1     |
| F602    | 3017   | 1     |
| F603    | 3013   | 2     |
| F604    | 30150  | 2     |
| F605    | 3014   | 1     |
| F606    | 30182  | 1     |
| F607    | 3016   | 1     |

| ICD10CA | ICD9CM | GRADE |
|---------|--------|-------|
| F608    | 30189  | 2     |
| F609    | 3019   | 1     |
| F61     | 30189  | 1     |
| F628    | 30189  | 2     |
| F630    | 31231  | 1     |
| F680    | 30016  | 0     |
| F688    | 3019   | 1     |
| F69     | 3019   | 2     |
| F700    | 317    | 0     |
| F709    | 317    | 1     |
| F711    | 3180   | 1     |
| F719    | 3180   | 1     |
| F721    | 3181   | 1     |
| F729    | 3181   | 1     |
| F739    | 3182   | 1     |
| F781    | 319    | 2     |
| F788    | 319    | 0     |
| F789    | 319    | 0     |
| F790    | 319    | 1     |
| F791    | 319    | 1     |
| F798    | 319    | 1     |
| F799    | 319    | 1     |
| F800    | 3079   | 0     |
| F801    | 31531  | 1     |
| F802    | 31532  | 1     |
| F809    | 31531  | 1     |
| F819    | 3159   | 1     |
| F840    | 29900  | 2     |
| F845    | 29980  | 0     |
| F849    | 29980  | 2     |
| F89     | 3159   | 1     |
| F900    | 31401  | 1     |
| F909    | 3149   | 1     |
| F911    | 31200  | 2     |
| F918    | 31289  | 1     |
| F919    | 3129   | 1     |
| F928    | 3124   | 1     |
| F952    | 30723  | 1     |
| F985    | 3070   | 1     |
| F99     | 3009   | 1     |
| G009    | 3209   | 1     |
| G01     | 3207   | 2     |
| G039    | 3229   | 1     |

| ICD10CA | ICD9CM | GRADE |
|---------|--------|-------|
| G048    | 3238   | 1     |
| G049    | 3239   | 1     |
| G051    | 3230   | 1     |
| G060    | 3240   | 1     |
| G061    | 3241   | 1     |
| G08     | 325    | 0     |
| G09     | 326    | 1     |
| G10     | 3334   | 1     |
| G110    | 3348   | 2     |
| G111    | 3340   | 2     |
| G112    | 3342   | 2     |
| G114    | 3341   | 1     |
| G118    | 3342   | 0     |
| G119    | 3342   | 2     |
| G121    | 33511  | 2     |
| G122    | 33529  | 2     |
| G1220   | 33520  | 0     |
| G1222   | 33520  | 0     |
| G130    | 3349   | 1     |
| G131    | 3344   | 2     |
| G14     | 33519  | 3     |
| G20     | 3320   | 1     |
| G210    | 33392  | 1     |
| G211    | 3321   | 1     |
| G214    | 3321   | 1     |
| G218    | 3321   | 1     |
| G22     | 3321   | 1     |
| G231    | 3330   | 1     |
| G232    | 3330   | 1     |
| G238    | 3330   | 1     |
| G239    | 3330   | 1     |
| G240    | 3337   | 2     |
| G243    | 33383  | 1     |
| G244    | 33382  | 1     |
| G245    | 33381  | 1     |
| G248    | 3336   | 2     |
| G249    | 33390  | 2     |
| G250    | 3331   | 1     |
| G251    | 3331   | 1     |
| G252    | 3331   | 1     |
| G253    | 3332   | 1     |
| G254    | 3335   | 1     |
| G255    | 3335   | 1     |

| ICD10CA | ICD9CM | GRADE |
|---------|--------|-------|
| G258    | 33399  | 2     |
| G259    | 33390  | 1     |
| G300    | 3310   | 1     |
| G301    | 3310   | 1     |
| G308    | 3310   | 1     |
| G3080   | 2941   | 0     |
| G3081   | 2941   | 0     |
| G3082   | 29010  | 0     |
| G3088   | 3320   | 0     |
| G309    | 3310   | 1     |
| G310    | 3311   | 1     |
| G3102   | 2941   | 0     |
| G311    | 3312   | 1     |
| G312    | 30390  | 2     |
| G318    | 3308   | 2     |
| G319    | 3319   | 2     |
| G328    | 3317   | 2     |
| G35     | 340    | 1     |
| G372    | 3418   | 1     |
| G373    | 3418   | 0     |
| G378    | 3418   | 1     |
| G379    | 3419   | 1     |
| G4000   | 34550  | 2     |
| G401    | 34540  | 0     |
| G4010   | 34550  | 2     |
| G402    | 34540  | 0     |
| G4020   | 34540  | 2     |
| G403    | 34510  | 0     |
| G4030   | 34510  | 2     |
| G404    | 34580  | 0     |
| G4040   | 34560  | 2     |
| G405    | 34570  | 0     |
| G406    | 34530  | 0     |
| G4060   | 34510  | 2     |
| G407    | 34520  | 0     |
| G4070   | 34500  | 2     |
| G408    | 34580  | 0     |
| G4080   | 34580  | 2     |
| G409    | 34590  | 0     |
| G4090   | 34590  | 2     |
| G4091   | 34591  | 2     |
| G410    | 3453   | 1     |
| G412    | 34570  | 2     |

| ICD10CA | ICD9CM | GRADE |
|---------|--------|-------|
| G418    | 3453   | 2     |
| G419    | 3453   | 2     |
| G430    | 34610  | 2     |
| G431    | 34600  | 2     |
| G438    | 34680  | 2     |
| G439    | 34690  | 2     |
| G442    | 30781  | 1     |
| G444    | 7840   | 0     |
| G448    | 7840   | 2     |
| G450    | 4353   | 2     |
| G451    | 4358   | 1     |
| G452    | 4358   | 2     |
| G453    | 36234  | 2     |
| G454    | 4377   | 1     |
| G458    | 4358   | 2     |
| G459    | 4359   | 1     |
| G460    | 43490  | 1     |
| G463    | 34489  | 3     |
| G464    | 436    | 1     |
| G465    | 436    | 1     |
| G467    | 436    | 1     |
| G468    | 34489  | 3     |
| G470    | 78052  | 2     |
| G472    | 78055  | 2     |
| G4730   | 78057  | 1     |
| G4731   | 78057  | 1     |
| G4738   | 78057  | 1     |
| G474    | 347    | 1     |
| G478    | 78059  | 2     |
| G479    | 78050  | 1     |
| G500    | 3501   | 1     |
| G501    | 3502   | 1     |
| G510    | 3510   | 1     |
| G513    | 3518   | 2     |
| G518    | 3518   | 1     |
| G519    | 3519   | 1     |
| G521    | 3522   | 1     |
| G523    | 3525   | 1     |
| G529    | 3529   | 1     |
| G530    | 3501   | 2     |
| G540    | 3530   | 1     |
| G541    | 3531   | 0     |
| G544    | 3534   | 0     |



| ICD10CA | ICD9CM | GRADE |
|---------|--------|-------|
| G546    | 3536   | 1     |
| G550    | 3539   | 2     |
| G551    | 3363   | 1     |
| G552    | 3539   | 2     |
| G553    | 3539   | 2     |
| G560    | 3540   | 1     |
| G562    | 3542   | 1     |
| G563    | 3543   | 1     |
| G570    | 3550   | 1     |
| G571    | 3551   | 1     |
| G572    | 3552   | 1     |
| G573    | 3553   | 1     |
| G576    | 3556   | 0     |
| G577    | 3558   | 1     |
| G579    | 3558   | 1     |
| G588    | 3559   | 2     |
| G589    | 3559   | 1     |
| G590    | 3559   | 2     |
| G600    | 3561   | 2     |
| G602    | 3568   | 2     |
| G608    | 3568   | 2     |
| G609    | 3569   | 1     |
| G610    | 3570   | 1     |
| G618    | 3578   | 1     |
| G620    | 3576   | 1     |
| G621    | 3575   | 1     |
| G622    | 3577   | 1     |
| G628    | 3578   | 1     |
| G629    | 3569   | 2     |
| G630    | 3574   | 0     |
| G631    | 3573   | 1     |
| G632    | 3572   | 1     |
| G633    | 3574   | 1     |
| G635    | 3571   | 1     |
| G636    | 3574   | 2     |
| G64     | 34989  | 2     |
| G700    | 3580   | 1     |
| G708    | 3588   | 1     |
| G709    | 3589   | 1     |
| G710    | 3591   | 1     |
| G711    | 3592   | 1     |
| G712    | 3590   | 1     |
| G713    | 3590   | 2     |

| ICD10CA | ICD9CM | GRADE |
|---------|--------|-------|
| G720    | 3594   | 1     |
| G721    | 3594   | 1     |
| G723    | 3593   | 1     |
| G724    | 3598   | 2     |
| G728    | 3598   | 0     |
| G729    | 3599   | 1     |
| G730    | 3581   | 1     |
| G731    | 3581   | 1     |
| G800    | 3439   | 1     |
| G801    | 3430   | 1     |
| G802    | 3434   | 1     |
| G808    | 3438   | 1     |
| G809    | 3439   | 1     |
| G8100   | 34201  | 1     |
| G8101   | 34202  | 1     |
| G8109   | 34200  | 1     |
| G8110   | 34211  | 1     |
| G8111   | 34212  | 1     |
| G8119   | 34210  | 1     |
| G8190   | 34291  | 1     |
| G8191   | 34292  | 1     |
| G8199   | 34290  | 1     |
| G82013  | 34200  | 0     |
| G82092  | 3441   | 1     |
| G82093  | 3441   | 1     |
| G82193  | 3441   | 1     |
| G82212  | 3441   | 1     |
| G82213  | 3441   | 1     |
| G82221  | 3441   | 1     |
| G82222  | 3441   | 1     |
| G82223  | 3441   | 1     |
| G82291  | 3441   | 1     |
| G82292  | 3441   | 1     |
| G82293  | 3441   | 1     |
| G82491  | 34400  | 1     |
| G82511  | 34403  | 1     |
| G82521  | 34404  | 1     |
| G82591  | 34400  | 1     |
| G830    | 3442   | 1     |
| G831    | 34430  | 2     |
| G8320   | 34441  | 1     |
| G8321   | 34442  | 1     |
| G8322   | 34440  | 1     |

| ICD10CA | ICD9CM | GRADE |
|---------|--------|-------|
| G834    | 34460  | 2     |
| G835    | 34481  | 1     |
| G838    | 34489  | 2     |
| G839    | 3449   | 1     |
| G900    | 3370   | 1     |
| G901    | 7428   | 0     |
| G902    | 3379   | 1     |
| G903    | 3330   | 2     |
| G908    | 3379   | 0     |
| G909    | 3379   | 1     |
| G910    | 3313   | 1     |
| G911    | 3314   | 1     |
| G912    | 3314   | 2     |
| G913    | 3314   | 2     |
| G918    | 3314   | 2     |
| G919    | 3314   | 1     |
| G92     | 34982  | 1     |
| G930    | 3480   | 1     |
| G931    | 3481   | 1     |
| G932    | 3482   | 1     |
| G933    | 78079  | 2     |
| G934    | 3483   | 1     |
| G935    | 3484   | 2     |
| G936    | 3485   | 1     |
| G9380   | 78009  | 1     |
| G9381   | 3488   | 0     |
| G9388   | 3488   | 1     |
| G939    | 3489   | 1     |
| G940    | 3314   | 2     |
| G941    | 3314   | 2     |
| G948    | 3317   | 2     |
| G950    | 3360   | 1     |
| G951    | 3361   | 1     |
| G952    | 3369   | 1     |
| G958    | 3368   | 2     |
| G959    | 3369   | 1     |
| G9602   | 34981  | 1     |
| G9608   | 34981  | 1     |
| G9609   | 34981  | 1     |
| G961    | 3492   | 1     |
| G971    | 3490   | 1     |
| G978    | 99709  | 1     |
| G979    | 99700  | 1     |

| ICD10CA | ICD9CM | GRADE |
|---------|--------|-------|
| G98     | 34989  | 2     |
| G990    | 3371   | 1     |
| G992    | 3363   | 1     |
| H000    | 37311  | 2     |
| H010    | 37300  | 1     |
| H011    | 37332  | 2     |
| H018    | 3738   | 1     |
| H019    | 3739   | 1     |
| H020    | 37400  | 2     |
| H021    | 37410  | 2     |
| H024    | 37430  | 2     |
| H027    | 37456  | 2     |
| H028    | 37489  | 2     |
| H029    | 3749   | 0     |
| H031    | 3734   | 1     |
| H041    | 37515  | 2     |
| H042    | 37520  | 1     |
| H043    | 37530  | 2     |
| H050    | 37600  | 2     |
| H052    | 37630  | 2     |
| H062    | 37621  | 1     |
| H100    | 37203  | 1     |
| H101    | 37205  | 1     |
| H102    | 37200  | 1     |
| H103    | 37200  | 1     |
| H104    | 37210  | 0     |
| H105    | 37220  | 2     |
| H108    | 37239  | 1     |
| H109    | 37230  | 1     |
| H110    | 37240  | 2     |
| H113    | 37272  | 1     |
| H114    | 37274  | 2     |
| H131    | 37215  | 2     |
| H133    | 37230  | 2     |
| H150    | 37900  | 0     |
| H159    | 37919  | 1     |
| H160    | 37000  | 2     |
| H161    | 37020  | 2     |
| H162    | 37040  | 2     |
| H168    | 3708   | 1     |
| H169    | 3709   | 1     |
| H181    | 37123  | 1     |
| H182    | 37120  | 2     |

| ICD10CA | ICD9CM | GRADE |
|---------|--------|-------|
| H184    | 37140  | 0     |
| H185    | 37150  | 2     |
| H187    | 37170  | 2     |
| H188    | 37189  | 2     |
| H189    | 3719   | 1     |
| H191    | 37040  | 1     |
| H192    | 37040  | 2     |
| H201    | 36410  | 1     |
| H209    | 3643   | 1     |
| H213    | 36460  | 2     |
| H250    | 36612  | 0     |
| H251    | 36616  | 1     |
| H258    | 36619  | 1     |
| H259    | 36610  | 1     |
| H268    | 3668   | 0     |
| H269    | 3669   | 1     |
| H270    | 37939  | 0     |
| H280    | 36641  | 1     |
| H309    | 36320  | 1     |
| H311    | 36340  | 0     |
| H318    | 3638   | 0     |
| H332    | 3612   | 1     |
| H335    | 36189  | 1     |
| H342    | 36233  | 2     |
| H348    | 36230  | 2     |
| H350    | 36210  | 2     |
| H352    | 36229  | 2     |
| H353    | 36250  | 2     |
| H354    | 36260  | 2     |
| H355    | 36270  | 2     |
| H356    | 36281  | 1     |
| H358    | 36289  | 2     |
| H359    | 3629   | 1     |
| H360    | 36201  | 1     |
| H400    | 36504  | 0     |
| H401    | 36515  | 2     |
| H402    | 36524  | 2     |
| H405    | 36562  | 2     |
| H408    | 36581  | 2     |
| H409    | 3659   | 1     |
| H420    | 36544  | 2     |
| H431    | 37923  | 1     |
| H433    | 37924  | 2     |

| ICD10CA | ICD9CM | GRADE |
|---------|--------|-------|
| H438    | 37929  | 2     |
| H440    | 36000  | 2     |
| H449    | 3609   | 1     |
| H46     | 37730  | 2     |
| H470    | 37749  | 2     |
| H471    | 37700  | 2     |
| H4728   | 37710  | 0     |
| H477    | 3779   | 1     |
| H490    | 37852  | 2     |
| H492    | 37854  | 1     |
| H509    | 3789   | 1     |
| H521    | 3671   | 1     |
| H524    | 3674   | 0     |
| H530    | 36800  | 0     |
| H531    | 36810  | 2     |
| H532    | 3682   | 1     |
| H534    | 36840  | 2     |
| H538    | 3688   | 1     |
| H539    | 3689   | 1     |
| H540    | 36900  | 2     |
| H541    | 36910  | 2     |
| H542    | 36920  | 2     |
| H543    | 3693   | 1     |
| H544    | 36960  | 2     |
| H547    | 36900  | 0     |
| H549    | 3699   | 1     |
| H55     | 37950  | 2     |
| H570    | 37940  | 2     |
| H571    | 37991  | 1     |
| H578    | 3798   | 1     |
| H579    | 37990  | 2     |
| H588    | 3798   | 1     |
| H5980   | 99882  | 1     |
| H5981   | 36253  | 1     |
| H601    | 38010  | 0     |
| H603    | 38012  | 0     |
| H604    | 38021  | 1     |
| H605    | 38022  | 0     |
| H608    | 38023  | 1     |
| H609    | 38010  | 1     |
| H610    | 38000  | 0     |
| H612    | 3804   | 1     |
| H613    | 38050  | 2     |

| ICD10CA | ICD9CM | GRADE |
|---------|--------|-------|
| H650    | 38101  | 1     |
| H654    | 3813   | 1     |
| H659    | 3814   | 1     |
| H660    | 38200  | 2     |
| H664    | 3824   | 1     |
| H669    | 3829   | 1     |
| H709    | 3839   | 1     |
| H71     | 38532  | 2     |
| H729    | 38420  | 1     |
| H738    | 38481  | 0     |
| H809    | 3879   | 1     |
| H810    | 38600  | 2     |
| H811    | 38611  | 1     |
| H812    | 38612  | 1     |
| H813    | 38610  | 1     |
| H814    | 3862   | 1     |
| H818    | 3868   | 1     |
| H819    | 3869   | 1     |
| H830    | 38630  | 2     |
| H832    | 38650  | 0     |
| H833    | 38810  | 0     |
| H838    | 3888   | 1     |
| H839    | 3889   | 1     |
| H900    | 38901  | 2     |
| H903    | 38911  | 2     |
| H905    | 38910  | 1     |
| H906    | 3892   | 1     |
| H911    | 38801  | 1     |
| H913    | 3897   | 1     |
| H918    | 3898   | 1     |
| H919    | 3899   | 1     |
| H920    | 38870  | 2     |
| H921    | 38860  | 2     |
| H922    | 38869  | 1     |
| H931    | 38830  | 2     |
| H932    | 3888   | 0     |
| I00     | 390    | 1     |
| I050    | 3940   | 1     |
| I051    | 3941   | 1     |
| I052    | 3942   | 1     |
| I058    | 3949   | 1     |
| I059    | 3949   | 1     |
| I060    | 3950   | 1     |

| ICD10CA | ICD9CM | GRADE |
|---------|--------|-------|
| I062    | 3952   | 1     |
| I069    | 3959   | 1     |
| I070    | 3970   | 1     |
| I071    | 3970   | 1     |
| I072    | 3970   | 1     |
| I078    | 3970   | 1     |
| I079    | 3970   | 1     |
| I080    | 3969   | 2     |
| I081    | 3949   | 2     |
| I082    | 3959   | 2     |
| I083    | 3969   | 2     |
| I088    | 39899  | 3     |
| I089    | 3979   | 3     |
| I090    | 3980   | 0     |
| I091    | 3979   | 1     |
| I098    | 39890  | 1     |
| I099    | 39890  | 1     |
| I100    | 4011   | 1     |
| I101    | 4010   | 1     |
| I11     | 40290  | 1     |
| I12     | 40390  | 1     |
| I13     | 40490  | 1     |
| I1500   | 40591  | 1     |
| I1510   | 40599  | 1     |
| I1520   | 40599  | 1     |
| I1580   | 40599  | 1     |
| I1581   | 40509  | 1     |
| I1590   | 40599  | 1     |
| I200    | 4111   | 2     |
| I201    | 4139   | 2     |
| I2080   | 4139   | 1     |
| I2088   | 4139   | 1     |
| I209    | 4139   | 1     |
| I210    | 41010  | 2     |
| I211    | 41040  | 2     |
| I212    | 41080  | 2     |
| I213    | 41090  | 1     |
| I214    | 41070  | 1     |
| I2140   | 41000  | 0     |
| I2141   | 41020  | 0     |
| I2142   | 41050  | 0     |
| I2149   | 41070  | 0     |
| I219    | 41090  | 1     |



| ICD10CA | ICD9CM | GRADE |
|---------|--------|-------|
| I220    | 41012  | 2     |
| I221    | 41080  | 2     |
| I228    | 41082  | 2     |
| I229    | 41092  | 1     |
| I236    | 42979  | 2     |
| I2381   | 4239   | 2     |
| I2382   | 42979  | 1     |
| I2388   | 42979  | 1     |
| I240    | 41181  | 1     |
| I241    | 4110   | 1     |
| I248    | 41189  | 1     |
| I249    | 41189  | 2     |
| I250    | 4292   | 1     |
| I2510   | 41401  | 1     |
| I2511   | 41402  | 1     |
| I2512   | 41403  | 1     |
| I2513   | 41404  | 1     |
| I2514   | 41405  | 1     |
| I2515   | 41400  | 0     |
| I2519   | 41400  | 1     |
| I252    | 412    | 1     |
| I253    | 41410  | 2     |
| I254    | 41411  | 2     |
| I255    | 4148   | 1     |
| I256    | 4148   | 1     |
| I258    | 4148   | 1     |
| I259    | 4149   | 1     |
| I260    | 4150   | 1     |
| I269    | 41519  | 1     |
| I270    | 4160   | 1     |
| I272    | 4168   | 1     |
| I278    | 4168   | 1     |
| I279    | 4169   | 1     |
| I288    | 4178   | 1     |
| I289    | 4179   | 0     |
| I300    | 42091  | 0     |
| I301    | 42099  | 2     |
| I309    | 42090  | 1     |
| I311    | 4232   | 1     |
| I313    | 4239   | 1     |
| I319    | 4239   | 2     |
| I328    | 4200   | 2     |
| I330    | 4210   | 1     |

| ICD10CA | ICD9CM | GRADE |
|---------|--------|-------|
| I339    | 4219   | 1     |
| I340    | 4240   | 1     |
| I341    | 4240   | 1     |
| I342    | 4240   | 2     |
| I348    | 4240   | 1     |
| I349    | 4240   | 1     |
| I350    | 4241   | 1     |
| I351    | 4241   | 1     |
| I352    | 4241   | 1     |
| I358    | 4241   | 1     |
| I359    | 4241   | 1     |
| I360    | 4242   | 1     |
| I361    | 4242   | 1     |
| I368    | 4242   | 1     |
| I369    | 4242   | 1     |
| I370    | 4243   | 1     |
| I371    | 4243   | 1     |
| I38     | 42490  | 1     |
| I394    | 42491  | 3     |
| I412    | 4220   | 2     |
| I420    | 4254   | 2     |
| I421    | 4251   | 1     |
| I422    | 4254   | 1     |
| I424    | 4253   | 1     |
| I425    | 4254   | 1     |
| I426    | 4255   | 1     |
| I427    | 4259   | 0     |
| I428    | 4254   | 1     |
| I429    | 4254   | 2     |
| I430    | 4258   | 2     |
| I431    | 4257   | 1     |
| I432    | 4257   | 1     |
| I438    | 4258   | 1     |
| I440    | 42611  | 1     |
| I441    | 42612  | 2     |
| I442    | 4260   | 1     |
| I443    | 42610  | 1     |
| I444    | 4262   | 1     |
| I445    | 4262   | 0     |
| I446    | 4262   | 1     |
| I447    | 4263   | 1     |
| I450    | 4264   | 1     |
| I451    | 4264   | 1     |

| ICD10CA | ICD9CM | GRADE |
|---------|--------|-------|
| I452    | 42653  | 2     |
| I453    | 42654  | 2     |
| I454    | 42650  | 2     |
| I455    | 4266   | 1     |
| I456    | 4267   | 2     |
| I458    | 42689  | 1     |
| I459    | 4269   | 1     |
| I460    | 4275   | 1     |
| I461    | 4299   | 2     |
| I469    | 4275   | 1     |
| I470    | 42789  | 2     |
| I471    | 4270   | 1     |
| I472    | 4271   | 1     |
| I479    | 4272   | 1     |
| I480    | 42731  | 1     |
| I4800   | 42731  | 0     |
| I4801   | 42731  | 0     |
| I4802   | 42731  | 0     |
| I481    | 42732  | 1     |
| I483    | 42732  | 0     |
| I4890   | 42731  | 0     |
| I4891   | 42732  | 0     |
| I4900   | 42741  | 1     |
| I4901   | 42742  | 1     |
| I491    | 42761  | 2     |
| I492    | 42769  | 2     |
| I493    | 42769  | 1     |
| I494    | 42769  | 2     |
| I495    | 42781  | 1     |
| I498    | 42789  | 1     |
| I499    | 4279   | 1     |
| I500    | 4280   | 1     |
| I501    | 4281   | 1     |
| I509    | 4289   | 1     |
| I510    | 42971  | 1     |
| I511    | 4295   | 1     |
| I513    | 41090  | 2     |
| I514    | 4290   | 1     |
| I515    | 4291   | 1     |
| I516    | 4292   | 1     |
| I517    | 4293   | 1     |
| I518    | 42989  | 1     |
| I519    | 4299   | 1     |

| ICD10CA | ICD9CM | GRADE |
|---------|--------|-------|
| I528    | 4258   | 2     |
| I601    | 430    | 0     |
| I602    | 430    | 1     |
| I607    | 430    | 1     |
| I608    | 430    | 1     |
| I609    | 430    | 1     |
| I610    | 431    | 1     |
| I611    | 431    | 1     |
| I612    | 431    | 1     |
| I613    | 431    | 1     |
| I614    | 431    | 1     |
| I615    | 431    | 1     |
| I616    | 431    | 1     |
| I618    | 431    | 1     |
| I619    | 431    | 1     |
| I620    | 4321   | 1     |
| I629    | 4329   | 1     |
| I630    | 43391  | 2     |
| I631    | 43391  | 2     |
| I632    | 43391  | 2     |
| I633    | 43401  | 1     |
| I634    | 43411  | 1     |
| I635    | 43491  | 1     |
| I636    | 4376   | 2     |
| I638    | 43491  | 1     |
| I639    | 43491  | 1     |
| I64     | 436    | 1     |
| I650    | 43320  | 1     |
| I652    | 43310  | 1     |
| I653    | 43330  | 1     |
| I658    | 43380  | 0     |
| I659    | 43390  | 1     |
| I660    | 43490  | 2     |
| I661    | 43490  | 2     |
| I663    | 43380  | 1     |
| I664    | 43490  | 2     |
| I668    | 43490  | 2     |
| I669    | 43490  | 1     |
| I671    | 4373   | 1     |
| I672    | 4370   | 1     |
| I673    | 4378   | 2     |
| I674    | 4372   | 1     |
| I677    | 4374   | 1     |

| ICD10CA | ICD9CM | GRADE |
|---------|--------|-------|
| I678    | 4378   | 2     |
| I679    | 4379   | 1     |
| I680    | 4378   | 1     |
| I688    | 4378   | 0     |
| I690    | 43889  | 1     |
| I691    | 43889  | 1     |
| I692    | 43889  | 1     |
| I693    | 43889  | 1     |
| I694    | 43889  | 1     |
| I698    | 43889  | 1     |
| I700    | 4400   | 1     |
| I701    | 4401   | 1     |
| I702    | 44020  | 0     |
| I7020   | 44020  | 1     |
| I7021   | 44020  | 2     |
| I708    | 4408   | 1     |
| I709    | 4409   | 1     |
| I710    | 44100  | 2     |
| I711    | 4411   | 1     |
| I712    | 4412   | 1     |
| I713    | 4413   | 1     |
| I714    | 4414   | 1     |
| I715    | 4416   | 2     |
| I716    | 4417   | 2     |
| I718    | 4415   | 0     |
| I719    | 4419   | 1     |
| I720    | 44281  | 1     |
| I721    | 4420   | 1     |
| I722    | 4421   | 1     |
| I723    | 4422   | 1     |
| I724    | 4423   | 1     |
| I728    | 44289  | 1     |
| I729    | 4429   | 1     |
| I730    | 4430   | 1     |
| I731    | 4431   | 1     |
| I738    | 44389  | 1     |
| I739    | 4439   | 1     |
| I740    | 4440   | 1     |
| I741    | 4441   | 1     |
| I742    | 44421  | 1     |
| I743    | 44422  | 1     |
| I744    | 44422  | 2     |
| I745    | 44481  | 1     |

| ICD10CA | ICD9CM | GRADE |
|---------|--------|-------|
| I748    | 44489  | 1     |
| I749    | 4449   | 1     |
| I770    | 4470   | 2     |
| I771    | 4471   | 1     |
| I772    | 4472   | 1     |
| I776    | 4476   | 1     |
| I778    | 4478   | 1     |
| I779    | 4479   | 1     |
| I780    | 4480   | 1     |
| I781    | 4481   | 1     |
| I788    | 4489   | 1     |
| I792    | 44381  | 1     |
| I800    | 4510   | 1     |
| I801    | 45111  | 2     |
| I802    | 45119  | 1     |
| I803    | 4512   | 1     |
| I808    | 45189  | 2     |
| I809    | 4519   | 1     |
| I81     | 452    | 1     |
| I822    | 4532   | 1     |
| I828    | 4538   | 1     |
| I829    | 4539   | 1     |
| I830    | 4540   | 1     |
| I831    | 4541   | 1     |
| I832    | 4542   | 1     |
| I838    | 4549   | 2     |
| I839    | 4549   | 1     |
| I840    | 4551   | 1     |
| I841    | 4552   | 1     |
| I842    | 4550   | 1     |
| I843    | 4554   | 1     |
| I844    | 4555   | 1     |
| I845    | 4553   | 1     |
| I847    | 4557   | 1     |
| I848    | 4558   | 1     |
| I849    | 4556   | 1     |
| I850    | 4560   | 1     |
| I859    | 4561   | 1     |
| I861    | 4564   | 1     |
| I864    | 4568   | 1     |
| I868    | 4568   | 1     |
| I870    | 4591   | 0     |
| I8700   | 4591   | 1     |

| ICD10CA | ICD9CM | GRADE |
|---------|--------|-------|
| I8708   | 4591   | 1     |
| I8709   | 4591   | 1     |
| I871    | 4592   | 1     |
| I872    | 45981  | 1     |
| I878    | 45989  | 2     |
| I890    | 4571   | 1     |
| I898    | 4578   | 1     |
| I899    | 4579   | 1     |
| I950    | 4581   | 1     |
| I951    | 4580   | 1     |
| I952    | 4582   | 1     |
| I958    | 4588   | 1     |
| I959    | 4589   | 1     |
| I970    | 4294   | 1     |
| I971    | 4294   | 1     |
| I972    | 4570   | 1     |
| I978    | 9971   | 1     |
| I979    | 9971   | 1     |
| I982    | 45621  | 1     |
| I983    | 45620  | 1     |
| I99     | 4599   | 2     |
| J00     | 460    | 1     |
| J010    | 4610   | 1     |
| J013    | 4613   | 1     |
| J019    | 4619   | 1     |
| J020    | 0340   | 1     |
| J028    | 462    | 0     |
| J029    | 462    | 1     |
| J040    | 4640   | 1     |
| J041    | 46410  | 1     |
| J051    | 46430  | 1     |
| J068    | 4658   | 0     |
| J069    | 4659   | 1     |
| J09     | 4878   | 1     |
| J100    | 4870   | 1     |
| J101    | 4871   | 1     |
| J108    | 4878   | 1     |
| J110    | 4870   | 1     |
| J111    | 4871   | 1     |
| J118    | 4871   | 0     |
| J120    | 4800   | 0     |
| J121    | 4801   | 1     |
| J122    | 4802   | 1     |

| ICD10CA | ICD9CM | GRADE |
|---------|--------|-------|
| J128    | 4808   | 1     |
| J129    | 4809   | 1     |
| J13     | 481    | 2     |
| J14     | 4822   | 1     |
| J150    | 4820   | 1     |
| J151    | 4821   | 1     |
| J152    | 48240  | 1     |
| J153    | 48232  | 1     |
| J154    | 48239  | 2     |
| J155    | 48282  | 1     |
| J156    | 48283  | 1     |
| J157    | 4830   | 1     |
| J158    | 48289  | 1     |
| J159    | 4829   | 1     |
| J160    | 4831   | 1     |
| J168    | 4838   | 2     |
| J170    | 4848   | 2     |
| J171    | 4808   | 0     |
| J172    | 4847   | 1     |
| J173    | 4848   | 3     |
| J178    | 4848   | 2     |
| J180    | 485    | 1     |
| J181    | 481    | 1     |
| J182    | 514    | 1     |
| J188    | 486    | 1     |
| J189    | 486    | 1     |
| J202    | 4660   | 1     |
| J208    | 4660   | 0     |
| J2088   | 4660   | 2     |
| J209    | 4660   | 1     |
| J210    | 46611  | 0     |
| J219    | 46619  | 1     |
| J22     | 5198   | 2     |
| J300    | 4779   | 1     |
| J304    | 4779   | 1     |
| J310    | 4720   | 1     |
| J312    | 4721   | 1     |
| J320    | 4730   | 1     |
| J322    | 4732   | 1     |
| J323    | 4733   | 0     |
| J324    | 4738   | 1     |
| J328    | 4738   | 1     |
| J329    | 4739   | 1     |



| <b>ICD10CA</b> | <b>ICD9CM</b> | <b>GRADE</b> |
|----------------|---------------|--------------|
| J330           | 4710          | 0            |
| J339           | 4719          | 1            |
| J341           | 4781          | 1            |
| J342           | 470           | 1            |
| J348           | 4781          | 0            |
| J3488          | 4781          | 2            |
| J351           | 47411         | 1            |
| J358           | 4748          | 2            |
| J370           | 4760          | 0            |
| J3801          | 47832         | 1            |
| J3802          | 47834         | 1            |
| J3809          | 47830         | 1            |
| J381           | 4784          | 1            |
| J383           | 4785          | 2            |
| J384           | 4786          | 1            |
| J385           | 47875         | 1            |
| J386           | 47874         | 1            |
| J387           | 47879         | 2            |
| J392           | 47826         | 2            |
| J393           | 4788          | 1            |
| J398           | 4789          | 1            |
| J399           | 5199          | 0            |
| J40            | 490           | 1            |
| J410           | 4910          | 1            |
| J411           | 4911          | 1            |
| J42            | 4919          | 1            |
| J432           | 4928          | 1            |
| J438           | 4928          | 1            |
| J439           | 4928          | 2            |
| J440           | 496           | 1            |
| J441           | 49121         | 2            |
| J448           | 49120         | 2            |
| J449           | 496           | 1            |
| J4500          | 49300         | 1            |
| J4510          | 49310         | 1            |
| J4580          | 49300         | 1            |
| J4590          | 49390         | 1            |
| J4591          | 49391         | 1            |
| J47            | 494           | 1            |
| J60            | 500           | 1            |
| J61            | 501           | 1            |
| J628           | 502           | 1            |
| J64            | 505           | 1            |

| ICD10CA | ICD9CM | GRADE |
|---------|--------|-------|
| J670    | 4950   | 2     |
| J672    | 4952   | 1     |
| J680    | 5060   | 1     |
| J683    | 5063   | 1     |
| J684    | 5064   | 1     |
| J690    | 5070   | 1     |
| J691    | 5071   | 1     |
| J698    | 5078   | 2     |
| J700    | 5080   | 1     |
| J701    | 5081   | 1     |
| J702    | 5088   | 2     |
| J703    | 5088   | 2     |
| J704    | 5088   | 2     |
| J708    | 5088   | 1     |
| J709    | 5089   | 1     |
| J80     | 5185   | 2     |
| J81     | 5184   | 2     |
| J82     | 5183   | 1     |
| J841    | 5163   | 1     |
| J848    | 5168   | 1     |
| J849    | 5169   | 2     |
| J850    | 5130   | 1     |
| J851    | 5130   | 1     |
| J852    | 5130   | 1     |
| J860    | 5100   | 1     |
| J869    | 5109   | 1     |
| J90     | 5119   | 1     |
| J91     | 5119   | 1     |
| J920    | 5110   | 1     |
| J929    | 5110   | 1     |
| J930    | 5120   | 1     |
| J931    | 5128   | 1     |
| J938    | 5128   | 2     |
| J939    | 5128   | 1     |
| J941    | 5110   | 1     |
| J942    | 5118   | 1     |
| J948    | 5118   | 1     |
| J949    | 5110   | 2     |
| J9500   | 51909  | 1     |
| J9501   | 51901  | 1     |
| J9502   | 51902  | 1     |
| J9503   | 51909  | 1     |
| J9508   | 51909  | 1     |

| ICD10CA | ICD9CM | GRADE |
|---------|--------|-------|
| J951    | 5185   | 1     |
| J952    | 5185   | 1     |
| J953    | 5185   | 1     |
| J954    | 9973   | 1     |
| J955    | 47874  | 3     |
| J9580   | 5121   | 1     |
| J9581   | 5185   | 3     |
| J9588   | 9973   | 1     |
| J959    | 9973   | 1     |
| J960    | 51881  | 2     |
| J9600   | 51881  | 0     |
| J9601   | 51881  | 0     |
| J9609   | 51881  | 0     |
| J961    | 51881  | 2     |
| J9610   | 5188   | 0     |
| J9611   | 5188   | 0     |
| J9619   | 5188   | 0     |
| J969    | 51881  | 2     |
| J9690   | 51881  | 0     |
| J9691   | 51881  | 0     |
| J9699   | 51881  | 0     |
| J980    | 5191   | 2     |
| J9810   | 5180   | 1     |
| J9818   | 5180   | 1     |
| J982    | 5181   | 1     |
| J984    | 51889  | 2     |
| J985    | 5193   | 2     |
| J986    | 5194   | 1     |
| J988    | 5198   | 1     |
| J989    | 5199   | 1     |
| J990    | 5178   | 2     |
| J991    | 5172   | 2     |
| J998    | 5178   | 1     |
| K028    | 5210   | 1     |
| K029    | 5210   | 1     |
| K036    | 5236   | 2     |
| K038    | 5218   | 1     |
| K040    | 5220   | 1     |
| K045    | 5226   | 1     |
| K047    | 5225   | 1     |
| K050    | 5230   | 0     |
| K051    | 5231   | 1     |
| K052    | 5233   | 1     |

| ICD10CA | ICD9CM | GRADE |
|---------|--------|-------|
| K053    | 5234   | 1     |
| K055    | 5238   | 1     |
| K056    | 5239   | 1     |
| K060    | 5232   | 1     |
| K062    | 5238   | 2     |
| K068    | 5238   | 2     |
| K069    | 5239   | 1     |
| K0760   | 52469  | 1     |
| K0762   | 52469  | 0     |
| K0763   | 52462  | 1     |
| K0768   | 52469  | 1     |
| K0769   | 52460  | 1     |
| K081    | 5251   | 1     |
| K0887   | 5259   | 1     |
| K0888   | 5258   | 1     |
| K089    | 5259   | 1     |
| K098    | 5284   | 1     |
| K100    | 52689  | 2     |
| K102    | 5264   | 2     |
| K108    | 52689  | 2     |
| K111    | 5271   | 1     |
| K112    | 5272   | 1     |
| K113    | 5273   | 1     |
| K115    | 5275   | 1     |
| K116    | 5276   | 1     |
| K117    | 5277   | 1     |
| K118    | 5278   | 2     |
| K120    | 5282   | 1     |
| K121    | 5280   | 2     |
| K122    | 5283   | 2     |
| K123    | 5280   | 0     |
| K130    | 5285   | 2     |
| K132    | 5286   | 1     |
| K134    | 5289   | 1     |
| K137    | 5289   | 1     |
| K140    | 5290   | 1     |
| K143    | 5293   | 1     |
| K148    | 5298   | 1     |
| K20     | 53010  | 2     |
| K210    | 53011  | 1     |
| K219    | 53081  | 1     |
| K220    | 5300   | 1     |
| K221    | 5302   | 0     |

| ICD10CA | ICD9CM | GRADE |
|---------|--------|-------|
| K2210   | 5302   | 1     |
| K2211   | 5302   | 1     |
| K2213   | 5302   | 1     |
| K2214   | 5302   | 1     |
| K2215   | 5302   | 1     |
| K2217   | 5302   | 1     |
| K2219   | 5302   | 1     |
| K222    | 5303   | 1     |
| K223    | 5304   | 0     |
| K224    | 5305   | 1     |
| K225    | 5306   | 1     |
| K226    | 5307   | 1     |
| K227    | 5302   | 2     |
| K228    | 53089  | 2     |
| K229    | 5309   | 1     |
| K250    | 53100  | 2     |
| K251    | 53110  | 2     |
| K252    | 53120  | 2     |
| K253    | 53130  | 2     |
| K254    | 53140  | 2     |
| K255    | 53150  | 2     |
| K257    | 53170  | 2     |
| K259    | 53190  | 2     |
| K260    | 53200  | 2     |
| K261    | 53210  | 2     |
| K262    | 53220  | 2     |
| K263    | 53230  | 2     |
| K264    | 53240  | 2     |
| K265    | 53250  | 2     |
| K266    | 53260  | 2     |
| K267    | 53270  | 2     |
| K269    | 53290  | 2     |
| K270    | 53300  | 2     |
| K271    | 53310  | 2     |
| K273    | 53330  | 2     |
| K274    | 53340  | 2     |
| K275    | 53350  | 2     |
| K276    | 53360  | 2     |
| K277    | 53370  | 2     |
| K279    | 53390  | 2     |
| K280    | 53400  | 2     |
| K284    | 53440  | 2     |
| K287    | 53470  | 2     |

| ICD10CA | ICD9CM | GRADE |
|---------|--------|-------|
| K289    | 53490  | 2     |
| K290    | 53501  | 1     |
| K291    | 53500  | 1     |
| K292    | 53530  | 2     |
| K293    | 53540  | 2     |
| K294    | 53510  | 2     |
| K295    | 53510  | 2     |
| K296    | 53540  | 2     |
| K297    | 53550  | 2     |
| K298    | 53560  | 2     |
| K299    | 53550  | 2     |
| K30     | 5368   | 1     |
| K310    | 5361   | 1     |
| K311    | 5370   | 1     |
| K314    | 5371   | 1     |
| K315    | 5373   | 2     |
| K316    | 5374   | 1     |
| K317    | 2111   | 1     |
| K318    | 53789  | 0     |
| K3180   | 53783  | 1     |
| K3181   | 53782  | 1     |
| K3188   | 53789  | 1     |
| K319    | 5379   | 1     |
| K350    | 5400   | 0     |
| K351    | 5401   | 0     |
| K37     | 541    | 0     |
| K400    | 55012  | 2     |
| K402    | 55092  | 2     |
| K403    | 55010  | 2     |
| K409    | 55090  | 2     |
| K413    | 55200  | 2     |
| K419    | 55300  | 2     |
| K420    | 5521   | 1     |
| K429    | 5531   | 1     |
| K430    | 55220  | 2     |
| K431    | 55120  | 2     |
| K432    | 55321  | 0     |
| K433    | 55229  | 0     |
| K436    | 55220  | 0     |
| K439    | 55320  | 2     |
| K440    | 5523   | 1     |
| K449    | 5533   | 1     |
| K450    | 5528   | 1     |

| ICD10CA | ICD9CM | GRADE |
|---------|--------|-------|
| K458    | 5538   | 1     |
| K469    | 5539   | 1     |
| K500    | 5550   | 1     |
| K501    | 5551   | 1     |
| K508    | 5559   | 0     |
| K509    | 5559   | 1     |
| K510    | 5560   | 1     |
| K511    | 5561   | 0     |
| K512    | 5562   | 1     |
| K513    | 5563   | 1     |
| K514    | 556    | 0     |
| K518    | 5568   | 2     |
| K519    | 5569   | 1     |
| K520    | 5581   | 1     |
| K521    | 5582   | 1     |
| K522    | 5589   | 1     |
| K528    | 5589   | 1     |
| K529    | 5589   | 2     |
| K550    | 5570   | 1     |
| K551    | 5571   | 1     |
| K552    | 56984  | 0     |
| K5520   | 56985  | 1     |
| K5521   | 56984  | 1     |
| K558    | 56989  | 1     |
| K559    | 5579   | 1     |
| K560    | 5601   | 1     |
| K562    | 5602   | 1     |
| K563    | 56031  | 1     |
| K564    | 56039  | 2     |
| K565    | 56081  | 1     |
| K566    | 56089  | 2     |
| K567    | 5601   | 1     |
| K570    | 56200  | 3     |
| K571    | 56200  | 2     |
| K572    | 56210  | 3     |
| K573    | 56210  | 2     |
| K574    | 56200  | 3     |
| K575    | 56200  | 3     |
| K578    | 56210  | 3     |
| K579    | 56210  | 2     |
| K580    | 5641   | 3     |
| K589    | 5641   | 1     |
| K590    | 5640   | 1     |

| <b>ICD10CA</b> | <b>ICD9CM</b> | <b>GRADE</b> |
|----------------|---------------|--------------|
| K591           | 5645          | 1            |
| K592           | 56481         | 1            |
| K593           | 5647          | 2            |
| K594           | 5646          | 1            |
| K598           | 56489         | 1            |
| K599           | 5649          | 1            |
| K600           | 5650          | 1            |
| K601           | 5650          | 1            |
| K602           | 5650          | 1            |
| K603           | 5651          | 1            |
| K604           | 5651          | 1            |
| K610           | 566           | 1            |
| K611           | 566           | 1            |
| K612           | 566           | 1            |
| K613           | 566           | 1            |
| K620           | 5690          | 1            |
| K621           | 5690          | 1            |
| K623           | 5691          | 1            |
| K624           | 5692          | 1            |
| K625           | 5693          | 1            |
| K626           | 56941         | 1            |
| K627           | 56949         | 2            |
| K628           | 56949         | 2            |
| K629           | 56949         | 0            |
| K630           | 5695          | 1            |
| K631           | 56983         | 1            |
| K632           | 56981         | 1            |
| K633           | 56982         | 1            |
| K635           | 2113          | 1            |
| K638           | 5698          | 0            |
| K6380          | 56985         | 0            |
| K6381          | 56984         | 0            |
| K6388          | 56989         | 1            |
| K639           | 5699          | 1            |
| K6420          | 4553          | 0            |
| K6430          | 4555          | 0            |
| K6431          | 4555          | 0            |
| K645           | 4557          | 0            |
| K648           | 4557          | 0            |
| K649           | 4557          | 0            |
| K650           | 5672          | 1            |
| K658           | 5678          | 2            |
| K659           | 5679          | 1            |



| ICD10CA | ICD9CM | GRADE |
|---------|--------|-------|
| K660    | 5680   | 2     |
| K661    | 56881  | 1     |
| K668    | 56882  | 1     |
| K669    | 5689   | 0     |
| K673    | 5670   | 1     |
| K700    | 5710   | 1     |
| K701    | 5711   | 1     |
| K702    | 5712   | 2     |
| K703    | 5712   | 1     |
| K704    | 5728   | 2     |
| K709    | 5713   | 1     |
| K711    | 5733   | 3     |
| K712    | 5733   | 3     |
| K716    | 5733   | 1     |
| K718    | 5733   | 3     |
| K720    | 570    | 1     |
| K721    | 5728   | 2     |
| K729    | 5728   | 1     |
| K732    | 57149  | 1     |
| K738    | 57149  | 1     |
| K739    | 57140  | 1     |
| K740    | 5715   | 1     |
| K743    | 5716   | 1     |
| K744    | 5716   | 1     |
| K745    | 5716   | 1     |
| K746    | 5715   | 1     |
| K750    | 5720   | 1     |
| K754    | 5733   | 1     |
| K758    | 5733   | 2     |
| K759    | 5733   | 1     |
| K760    | 5718   | 1     |
| K761    | 5730   | 1     |
| K763    | 5734   | 1     |
| K766    | 5723   | 1     |
| K767    | 5724   | 1     |
| K768    | 5738   | 1     |
| K769    | 5739   | 1     |
| K8000   | 57400  | 1     |
| K8001   | 57401  | 1     |
| K8010   | 57410  | 1     |
| K8011   | 57411  | 1     |
| K8020   | 57420  | 1     |
| K8021   | 57421  | 1     |

| ICD10CA | ICD9CM | GRADE |
|---------|--------|-------|
| K8030   | 57450  | 1     |
| K8031   | 57451  | 1     |
| K8040   | 57430  | 1     |
| K8041   | 57431  | 1     |
| K8050   | 57450  | 1     |
| K8051   | 57451  | 1     |
| K8080   | 57490  | 1     |
| K810    | 5750   | 1     |
| K811    | 57511  | 1     |
| K818    | 57510  | 2     |
| K819    | 57510  | 1     |
| K821    | 5753   | 0     |
| K822    | 5754   | 1     |
| K823    | 5755   | 1     |
| K828    | 5758   | 1     |
| K829    | 5759   | 1     |
| K830    | 5761   | 1     |
| K8302   | 5761   | 0     |
| K8308   | 5761   | 0     |
| K831    | 5762   | 1     |
| K834    | 5765   | 0     |
| K838    | 5768   | 1     |
| K839    | 5769   | 1     |
| K85     | 5770   | 0     |
| K850    | 5770   | 2     |
| K851    | 5770   | 2     |
| K852    | 5770   | 2     |
| K858    | 5770   | 2     |
| K859    | 5770   | 2     |
| K860    | 5771   | 2     |
| K861    | 5771   | 1     |
| K862    | 5772   | 1     |
| K863    | 5772   | 1     |
| K868    | 5778   | 1     |
| K869    | 5779   | 1     |
| K900    | 5790   | 1     |
| K901    | 5791   | 0     |
| K903    | 5794   | 1     |
| K904    | 5798   | 0     |
| K908    | 5798   | 2     |
| K909    | 5799   | 1     |
| K910    | 5643   | 1     |
| K911    | 5642   | 1     |

| ICD10CA | ICD9CM | GRADE |
|---------|--------|-------|
| K912    | 5793   | 2     |
| K913    | 9974   | 1     |
| K9140   | 56969  | 1     |
| K9141   | 56961  | 1     |
| K9142   | 56962  | 1     |
| K9143   | 56969  | 1     |
| K9144   | 5696   | 0     |
| K9145   | 56962  | 1     |
| K9161   | 53641  | 1     |
| K9162   | 53642  | 1     |
| K918    | 9974   | 2     |
| K919    | 9974   | 1     |
| K920    | 5780   | 1     |
| K921    | 5781   | 1     |
| K922    | 5789   | 1     |
| K928    | 56989  | 0     |
| K929    | 5699   | 1     |
| L010    | 684    | 1     |
| L020    | 6800   | 1     |
| L021    | 6801   | 1     |
| L022    | 6802   | 1     |
| L023    | 6805   | 1     |
| L024    | 6803   | 1     |
| L028    | 6808   | 0     |
| L029    | 6809   | 1     |
| L0300   | 68100  | 1     |
| L0301   | 68110  | 1     |
| L0310   | 6823   | 1     |
| L0311   | 6826   | 1     |
| L032    | 6820   | 1     |
| L0330   | 6822   | 1     |
| L0331   | 6822   | 1     |
| L0332   | 6822   | 1     |
| L0333   | 6822   | 1     |
| L0334   | 6822   | 1     |
| L0335   | 6825   | 1     |
| L0336   | 6822   | 1     |
| L0339   | 6822   | 1     |
| L038    | 6828   | 2     |
| L039    | 6829   | 1     |
| L043    | 683    | 1     |
| L050    | 6850   | 1     |
| L059    | 6851   | 1     |

| ICD10CA | ICD9CM | GRADE |
|---------|--------|-------|
| L080    | 68609  | 1     |
| L081    | 390    | 0     |
| L088    | 6868   | 1     |
| L089    | 6869   | 1     |
| L100    | 6944   | 1     |
| L104    | 6944   | 1     |
| L1088   | 6944   | 0     |
| L109    | 6944   | 1     |
| L111    | 7018   | 1     |
| L118    | 7018   | 1     |
| L120    | 6945   | 1     |
| L121    | 69461  | 1     |
| L129    | 6945   | 1     |
| L130    | 6940   | 1     |
| L138    | 6948   | 1     |
| L208    | 6918   | 1     |
| L209    | 6918   | 1     |
| L210    | 7048   | 0     |
| L218    | 69018  | 1     |
| L219    | 69010  | 1     |
| L22     | 6910   | 1     |
| L231    | 6924   | 2     |
| L233    | 6923   | 1     |
| L235    | 6924   | 1     |
| L238    | 69289  | 1     |
| L239    | 6929   | 1     |
| L240    | 6920   | 1     |
| L245    | 6924   | 1     |
| L248    | 69289  | 1     |
| L249    | 6929   | 1     |
| L251    | 6923   | 1     |
| L258    | 69289  | 1     |
| L259    | 6929   | 1     |
| L26     | 69589  | 1     |
| L270    | 6930   | 1     |
| L271    | 6930   | 1     |
| L272    | 6931   | 0     |
| L280    | 6983   | 1     |
| L281    | 6983   | 1     |
| L282    | 6982   | 1     |
| L293    | 6980   | 2     |
| L298    | 6988   | 1     |
| L299    | 6989   | 1     |

| ICD10CA | ICD9CM | GRADE |
|---------|--------|-------|
| L300    | 6929   | 1     |
| L302    | 69289  | 2     |
| L303    | 6908   | 1     |
| L304    | 69589  | 1     |
| L308    | 69289  | 1     |
| L309    | 6929   | 1     |
| L400    | 6961   | 1     |
| L401    | 6943   | 1     |
| L405    | 6960   | 1     |
| L408    | 6961   | 1     |
| L409    | 6961   | 1     |
| L410    | 6962   | 1     |
| L413    | 6962   | 1     |
| L438    | 6970   | 1     |
| L439    | 6970   | 1     |
| L441    | 6971   | 1     |
| L500    | 7080   | 1     |
| L503    | 7083   | 0     |
| L508    | 7088   | 1     |
| L509    | 7089   | 1     |
| L511    | 6951   | 1     |
| L519    | 6951   | 1     |
| L52     | 6952   | 0     |
| L538    | 69589  | 1     |
| L539    | 6959   | 1     |
| L561    | 69272  | 2     |
| L568    | 69279  | 1     |
| L570    | 7020   | 1     |
| L578    | 69279  | 1     |
| L580    | 69282  | 0     |
| L598    | 69282  | 1     |
| L600    | 7030   | 1     |
| L602    | 7038   | 1     |
| L603    | 7038   | 1     |
| L608    | 7038   | 1     |
| L630    | 70409  | 1     |
| L659    | 70400  | 1     |
| L711    | 6953   | 1     |
| L719    | 6953   | 1     |
| L720    | 7062   | 1     |
| L721    | 7062   | 1     |
| L728    | 7062   | 1     |
| L738    | 7048   | 1     |

| ICD10CA | ICD9CM | GRADE |
|---------|--------|-------|
| L739    | 7049   | 1     |
| L740    | 7051   | 1     |
| L750    | 70589  | 1     |
| L82     | 70219  | 1     |
| L83     | 7012   | 1     |
| L84     | 700    | 1     |
| L850    | 7011   | 1     |
| L851    | 7011   | 0     |
| L853    | 7068   | 1     |
| L858    | 7028   | 1     |
| L859    | 7018   | 2     |
| L88     | 68601  | 1     |
| L890    | 7070   | 1     |
| L891    | 7070   | 1     |
| L892    | 7070   | 1     |
| L893    | 7070   | 1     |
| L894    | 7070   | 0     |
| L895    | 7070   | 0     |
| L898    | 7070   | 1     |
| L899    | 7070   | 1     |
| L900    | 7010   | 1     |
| L905    | 7092   | 1     |
| L918    | 7018   | 1     |
| L929    | 7099   | 2     |
| L930    | 6954   | 1     |
| L931    | 6954   | 1     |
| L932    | 6954   | 0     |
| L940    | 7010   | 1     |
| L948    | 7098   | 3     |
| L958    | 7091   | 2     |
| L959    | 7091   | 2     |
| L97     | 7071   | 1     |
| L970    | 7071   | 0     |
| L971    | 7071   | 0     |
| L972    | 7071   | 0     |
| L973    | 7071   | 0     |
| L974    | 7071   | 0     |
| L978    | 7071   | 0     |
| L979    | 7071   | 0     |
| L980    | 6861   | 1     |
| L982    | 69589  | 2     |
| L984    | 7079   | 2     |
| L988    | 7098   | 1     |

| ICD10CA | ICD9CM | GRADE |
|---------|--------|-------|
| L989    | 7099   | 1     |
| L998    | 7098   | 3     |
| M0000   | 71109  | 1     |
| M0001   | 71101  | 1     |
| M0003   | 71103  | 1     |
| M0005   | 71105  | 1     |
| M0006   | 71106  | 1     |
| M0025   | 71105  | 1     |
| M0080   | 71109  | 2     |
| M0085   | 71105  | 2     |
| M0086   | 7114   | 0     |
| M0087   | 7114   | 0     |
| M0091   | 71101  | 1     |
| M0092   | 71102  | 1     |
| M0093   | 71103  | 1     |
| M0094   | 71104  | 1     |
| M0095   | 71105  | 1     |
| M0096   | 71106  | 1     |
| M0097   | 71107  | 1     |
| M0113   | 71143  | 2     |
| M0115   | 151    | 0     |
| M0116   | 71146  | 2     |
| M0185   | 71185  | 1     |
| M0365   | 71185  | 2     |
| M050    | 7141   | 1     |
| M051    | 71481  | 1     |
| M052    | 71489  | 2     |
| M053    | 7142   | 2     |
| M058    | 7140   | 2     |
| M059    | 7140   | 2     |
| M060    | 7140   | 2     |
| M061    | 7140   | 2     |
| M063    | 7140   | 2     |
| M064    | 71489  | 1     |
| M068    | 7140   | 2     |
| M069    | 7140   | 2     |
| M070    | 7133   | 2     |
| M073    | 7133   | 2     |
| M074    | 7131   | 1     |
| M080    | 71430  | 1     |
| M1000   | 2740   | 1     |
| M1002   | 2740   | 1     |
| M1003   | 2740   | 1     |

| ICD10CA | ICD9CM | GRADE |
|---------|--------|-------|
| M1004   | 2740   | 1     |
| M1005   | 2740   | 1     |
| M1006   | 2740   | 1     |
| M1007   | 2740   | 1     |
| M1008   | 27489  | 0     |
| M1009   | 2740   | 1     |
| M1016   | 9849   | 2     |
| M1017   | 9849   | 2     |
| M1037   | 27489  | 2     |
| M1090   | 2749   | 1     |
| M1091   | 2749   | 1     |
| M1092   | 2749   | 1     |
| M1093   | 2749   | 1     |
| M1094   | 2749   | 1     |
| M1095   | 2749   | 1     |
| M1096   | 2749   | 1     |
| M1097   | 2749   | 1     |
| M1098   | 2749   | 2     |
| M1099   | 2749   | 1     |
| M1105   | 27549  | 2     |
| M1120   | 27549  | 2     |
| M1123   | 27549  | 2     |
| M1124   | 27549  | 2     |
| M1125   | 27549  | 2     |
| M1126   | 27549  | 2     |
| M1127   | 27549  | 2     |
| M1128   | 27549  | 2     |
| M1129   | 27549  | 2     |
| M1183   | 71283  | 0     |
| M1185   | 71285  | 1     |
| M1186   | 71286  | 1     |
| M1187   | 71287  | 1     |
| M1190   | 71299  | 1     |
| M1193   | 71293  | 1     |
| M1194   | 71294  | 0     |
| M1195   | 71295  | 0     |
| M1200   | 7144   | 0     |
| M1219   | 71600  | 0     |
| M1225   | 71925  | 1     |
| M1252   | 71612  | 1     |
| M1253   | 71613  | 1     |
| M1281   | 71681  | 2     |
| M130    | 71650  | 1     |



| <b>ICD10CA</b> | <b>ICD9CM</b> | <b>GRADE</b> |
|----------------|---------------|--------------|
| M1300          | 71690         | 0            |
| M1306          | 71696         | 0            |
| M1309          | 71690         | 0            |
| M1316          | 71666         | 1            |
| M1380          | 71689         | 2            |
| M1381          | 71681         | 2            |
| M1382          | 71682         | 2            |
| M1384          | 71684         | 2            |
| M1385          | 71685         | 2            |
| M1386          | 71686         | 2            |
| M1388          | 71688         | 2            |
| M1389          | 71680         | 2            |
| M1390          | 71699         | 1            |
| M1391          | 71691         | 1            |
| M1392          | 71692         | 0            |
| M1393          | 71693         | 1            |
| M1394          | 71694         | 1            |
| M1395          | 71695         | 1            |
| M1396          | 71696         | 1            |
| M1397          | 71697         | 1            |
| M1398          | 71698         | 1            |
| M1399          | 71690         | 1            |
| M142           | 7130          | 1            |
| M145           | 7130          | 1            |
| M146           | 7135          | 3            |
| M148           | 7138          | 1            |
| M150           | 71500         | 2            |
| M154           | 71589         | 2            |
| M158           | 71650         | 1            |
| M159           | 71650         | 1            |
| M160           | 71515         | 1            |
| M161           | 71515         | 1            |
| M162           | 71535         | 2            |
| M163           | 71535         | 2            |
| M165           | 71525         | 1            |
| M166           | 71525         | 1            |
| M167           | 71525         | 1            |
| M169           | 71535         | 1            |
| M170           | 71516         | 1            |
| M171           | 71516         | 1            |
| M172           | 71536         | 0            |
| M173           | 71526         | 1            |
| M175           | 71526         | 1            |

| ICD10CA | ICD9CM | GRADE |
|---------|--------|-------|
| M179    | 71536  | 1     |
| M180    | 71514  | 1     |
| M181    | 71514  | 1     |
| M189    | 71534  | 1     |
| M190    | 71518  | 1     |
| M191    | 71520  | 1     |
| M192    | 71520  | 1     |
| M198    | 71590  | 2     |
| M199    | 71590  | 1     |
| M200    | 73620  | 2     |
| M201    | 7350   | 2     |
| M204    | 7354   | 1     |
| M205    | 7358   | 1     |
| M206    | 7359   | 0     |
| M210    | 73679  | 1     |
| M211    | 73679  | 2     |
| M212    | 7369   | 1     |
| M213    | 73605  | 1     |
| M214    | 734    | 0     |
| M216    | 73670  | 1     |
| M217    | 73681  | 1     |
| M2181   | 73689  | 1     |
| M2182   | 73689  | 1     |
| M2183   | 73689  | 1     |
| M2185   | 73689  | 1     |
| M2186   | 73689  | 1     |
| M2189   | 73689  | 1     |
| M219    | 7369   | 1     |
| M220    | 71836  | 2     |
| M221    | 71836  | 1     |
| M222    | 71996  | 0     |
| M224    | 7177   | 1     |
| M2320   | 7170   | 1     |
| M2323   | 7170   | 1     |
| M2326   | 7170   | 1     |
| M2333   | 7173   | 1     |
| M234    | 7176   | 1     |
| M235    | 71880  | 1     |
| M2361   | 71789  | 2     |
| M2363   | 71789  | 2     |
| M2364   | 71781  | 0     |
| M238    | 71789  | 1     |
| M2401   | 71811  | 1     |

| ICD10CA | ICD9CM | GRADE |
|---------|--------|-------|
| M2402   | 71812  | 1     |
| M2403   | 71813  | 1     |
| M2405   | 71815  | 1     |
| M2408   | 71818  | 1     |
| M2415   | 71805  | 1     |
| M2425   | 7289   | 2     |
| M2435   | 71825  | 1     |
| M2441   | 71831  | 1     |
| M2445   | 71835  | 1     |
| M2446   | 71836  | 1     |
| M2450   | 71849  | 1     |
| M2451   | 71841  | 0     |
| M2452   | 71842  | 0     |
| M2453   | 71843  | 1     |
| M2454   | 71844  | 1     |
| M2455   | 71845  | 1     |
| M2456   | 71846  | 1     |
| M2457   | 71847  | 1     |
| M2459   | 71840  | 0     |
| M2465   | 71855  | 1     |
| M2466   | 71856  | 1     |
| M2467   | 71857  | 1     |
| M247    | 71865  | 2     |
| M2481   | 71881  | 2     |
| M2485   | 71885  | 2     |
| M2501   | 71911  | 1     |
| M2502   | 71912  | 0     |
| M2505   | 71915  | 1     |
| M2527   | 71887  | 1     |
| M2531   | 71881  | 2     |
| M2532   | 71882  | 2     |
| M2534   | 71884  | 2     |
| M2535   | 71885  | 2     |
| M2536   | 71886  | 2     |
| M2537   | 71887  | 2     |
| M2540   | 71909  | 1     |
| M2541   | 71901  | 1     |
| M2542   | 71902  | 1     |
| M2545   | 71905  | 1     |
| M2546   | 71906  | 1     |
| M2547   | 71907  | 1     |
| M2550   | 71949  | 1     |
| M2551   | 71941  | 1     |

| ICD10CA | ICD9CM | GRADE |
|---------|--------|-------|
| M2552   | 71942  | 1     |
| M2553   | 71943  | 1     |
| M2555   | 71945  | 1     |
| M2556   | 71946  | 1     |
| M2557   | 71947  | 1     |
| M2558   | 71948  | 1     |
| M2559   | 71940  | 1     |
| M2565   | 71955  | 1     |
| M2566   | 71956  | 1     |
| M2575   | 72691  | 2     |
| M2578   | 72691  | 2     |
| M2581   | 71981  | 1     |
| M2582   | 71982  | 1     |
| M2583   | 71983  | 1     |
| M2585   | 71985  | 1     |
| M2586   | 71986  | 1     |
| M2588   | 71988  | 1     |
| M2591   | 71991  | 1     |
| M2592   | 71992  | 1     |
| M2593   | 71993  | 1     |
| M2595   | 71995  | 1     |
| M2596   | 71996  | 1     |
| M300    | 4460   | 1     |
| M301    | 4464   | 1     |
| M310    | 44620  | 2     |
| M311    | 4466   | 1     |
| M313    | 4464   | 1     |
| M314    | 4467   | 0     |
| M315    | 4465   | 1     |
| M316    | 4465   | 1     |
| M317    | 4460   | 2     |
| M318    | 4478   | 2     |
| M319    | 4475   | 1     |
| M321    | 7100   | 2     |
| M328    | 7100   | 1     |
| M329    | 7100   | 1     |
| M331    | 7103   | 1     |
| M332    | 7104   | 1     |
| M341    | 7101   | 2     |
| M348    | 7101   | 1     |
| M349    | 7101   | 1     |
| M350    | 7102   | 2     |
| M352    | 1361   | 1     |

| ICD10CA | ICD9CM | GRADE |
|---------|--------|-------|
| M353    | 725    | 1     |
| M354    | 72889  | 2     |
| M359    | 7109   | 2     |
| M361    | 7132   | 2     |
| M363    | 7132   | 1     |
| M4003   | 73710  | 0     |
| M4014   | 73719  | 2     |
| M4015   | 73719  | 0     |
| M4019   | 73719  | 2     |
| M4020   | 73719  | 2     |
| M4023   | 73719  | 0     |
| M4024   | 73719  | 2     |
| M4025   | 73719  | 2     |
| M4029   | 73719  | 2     |
| M4134   | 73734  | 1     |
| M4154   | 73739  | 2     |
| M4155   | 73743  | 0     |
| M4156   | 73730  | 2     |
| M4157   | 73730  | 2     |
| M4159   | 73739  | 2     |
| M4186   | 73739  | 1     |
| M4190   | 73739  | 1     |
| M4193   | 73739  | 0     |
| M4194   | 73739  | 1     |
| M4195   | 73739  | 1     |
| M4196   | 73739  | 1     |
| M4199   | 73739  | 1     |
| M4302   | 7384   | 2     |
| M4306   | 7384   | 2     |
| M4307   | 7384   | 2     |
| M4309   | 7384   | 2     |
| M4312   | 7384   | 1     |
| M4316   | 7384   | 1     |
| M4317   | 7384   | 1     |
| M4319   | 7384   | 1     |
| M4322   | 7249   | 1     |
| M4323   | 7249   | 1     |
| M4326   | 7249   | 1     |
| M4329   | 7249   | 1     |
| M4352   | 7248   | 2     |
| M436    | 7235   | 1     |
| M4386   | 7378   | 1     |
| M4392   | 7379   | 1     |

| ICD10CA | ICD9CM | GRADE |
|---------|--------|-------|
| M45     | 7200   | 1     |
| M4606   | 7201   | 1     |
| M4607   | 7201   | 1     |
| M461    | 7202   | 0     |
| M4625   | 73028  | 1     |
| M4628   | 73028  | 1     |
| M4636   | 72293  | 0     |
| M4642   | 72291  | 0     |
| M4647   | 72293  | 1     |
| M4649   | 72290  | 1     |
| M4690   | 7209   | 1     |
| M4692   | 7209   | 1     |
| M4696   | 7209   | 1     |
| M4697   | 7209   | 0     |
| M4699   | 7209   | 1     |
| M4709   | 7249   | 0     |
| M4712   | 7211   | 1     |
| M4717   | 72142  | 0     |
| M4722   | 7218   | 2     |
| M4726   | 7218   | 2     |
| M4780   | 72190  | 2     |
| M4782   | 7210   | 1     |
| M4783   | 7210   | 0     |
| M4785   | 7212   | 2     |
| M4786   | 7213   | 1     |
| M4787   | 7213   | 1     |
| M4789   | 72190  | 1     |
| M4792   | 72190  | 1     |
| M4793   | 7210   | 0     |
| M4794   | 72190  | 1     |
| M4795   | 72190  | 1     |
| M4796   | 72190  | 1     |
| M4797   | 72190  | 1     |
| M4798   | 72190  | 0     |
| M4799   | 72190  | 1     |
| M4800   | 72409  | 1     |
| M4802   | 7230   | 1     |
| M4803   | 72401  | 1     |
| M4804   | 72401  | 1     |
| M4805   | 72401  | 2     |
| M4806   | 72402  | 1     |
| M4807   | 72402  | 2     |
| M4808   | 72409  | 0     |

| ICD10CA | ICD9CM | GRADE |
|---------|--------|-------|
| M4809   | 72400  | 1     |
| M4819   | 7216   | 1     |
| M4825   | 7215   | 1     |
| M4840   | 73313  | 2     |
| M4844   | 73313  | 2     |
| M4845   | 73313  | 2     |
| M4846   | 73313  | 2     |
| M4849   | 8058   | 0     |
| M4850   | 73313  | 0     |
| M4854   | 73313  | 2     |
| M4855   | 73313  | 2     |
| M4856   | 73313  | 2     |
| M4857   | 73313  | 2     |
| M4882   | 7218   | 1     |
| M4886   | 7218   | 1     |
| M4896   | 7209   | 0     |
| M490    | 73743  | 2     |
| M495    | 73313  | 3     |
| M500    | 72271  | 1     |
| M501    | 72291  | 2     |
| M502    | 7220   | 1     |
| M503    | 7224   | 1     |
| M509    | 72291  | 0     |
| M510    | 72273  | 2     |
| M511    | 72210  | 1     |
| M512    | 72210  | 1     |
| M513    | 72251  | 2     |
| M518    | 72293  | 2     |
| M519    | 72290  | 1     |
| M5321   | 7249   | 1     |
| M5322   | 7249   | 1     |
| M5326   | 7246   | 0     |
| M5380   | 7248   | 1     |
| M5382   | 7238   | 0     |
| M5400   | 7236   | 0     |
| M5412   | 7234   | 1     |
| M5413   | 7244   | 2     |
| M5414   | 7244   | 1     |
| M5416   | 7244   | 1     |
| M5417   | 7244   | 1     |
| M5419   | 7244   | 2     |
| M542    | 7231   | 1     |
| M543    | 7243   | 1     |

| ICD10CA | ICD9CM | GRADE |
|---------|--------|-------|
| M544    | 7243   | 2     |
| M545    | 7242   | 1     |
| M546    | 7241   | 1     |
| M548    | 7245   | 2     |
| M549    | 7245   | 2     |
| M6005   | 7280   | 1     |
| M6006   | 7280   | 0     |
| M6008   | 7280   | 0     |
| M6025   | 72882  | 1     |
| M6086   | 7291   | 0     |
| M6088   | 7291   | 0     |
| M6089   | 7291   | 1     |
| M6090   | 7291   | 1     |
| M6098   | 7291   | 1     |
| M6099   | 7291   | 1     |
| M6155   | 72819  | 1     |
| M6195   | 72810  | 1     |
| M6208   | 72884  | 1     |
| M6215   | 72883  | 1     |
| M6225   | 72889  | 2     |
| M6226   | 72889  | 2     |
| M6227   | 72889  | 2     |
| M6235   | 7283   | 1     |
| M6236   | 7283   | 1     |
| M6239   | 7283   | 1     |
| M6244   | 72885  | 0     |
| M6245   | 72885  | 1     |
| M6246   | 72885  | 1     |
| M6247   | 72885  | 0     |
| M6250   | 7282   | 1     |
| M6252   | 7282   | 1     |
| M6256   | 7282   | 1     |
| M6258   | 7282   | 1     |
| M6259   | 7282   | 1     |
| M6261   | 8409   | 0     |
| M6263   | 8419   | 0     |
| M6265   | 72889  | 1     |
| M6268   | 72889  | 1     |
| M6280   | 72889  | 1     |
| M6281   | 72889  | 1     |
| M6282   | 72889  | 1     |
| M6283   | 72889  | 1     |
| M6284   | 72889  | 1     |



| ICD10CA | ICD9CM | GRADE |
|---------|--------|-------|
| M6285   | 72889  | 1     |
| M6286   | 72889  | 1     |
| M6287   | 72889  | 1     |
| M6288   | 72889  | 1     |
| M6289   | 72889  | 1     |
| M6290   | 7289   | 1     |
| M6292   | 7289   | 1     |
| M6293   | 7289   | 1     |
| M6295   | 7289   | 1     |
| M6298   | 7289   | 1     |
| M6299   | 7289   | 1     |
| M6515   | 72709  | 1     |
| M653    | 72703  | 1     |
| M6580   | 72709  | 1     |
| M6581   | 72709  | 1     |
| M6585   | 72709  | 1     |
| M6586   | 72709  | 1     |
| M6589   | 72709  | 1     |
| M6595   | 72700  | 1     |
| M6596   | 72700  | 1     |
| M6597   | 72700  | 1     |
| M660    | 72751  | 0     |
| M6624   | 72763  | 1     |
| M6642   | 72769  | 1     |
| M6645   | 72769  | 1     |
| M6655   | 72760  | 1     |
| M670    | 72781  | 1     |
| M6715   | 72781  | 1     |
| M6743   | 72742  | 1     |
| M6745   | 72742  | 1     |
| M6785   | 72789  | 1     |
| M702    | 72633  | 1     |
| M703    | 72633  | 1     |
| M704    | 72665  | 1     |
| M705    | 72660  | 1     |
| M706    | 7265   | 1     |
| M707    | 7265   | 1     |
| M7105   | 72789  | 1     |
| M7112   | 7273   | 1     |
| M7113   | 7273   | 1     |
| M7115   | 7273   | 1     |
| M7116   | 7273   | 1     |
| M7117   | 7273   | 1     |

| ICD10CA | ICD9CM | GRADE |
|---------|--------|-------|
| M712    | 72751  | 1     |
| M7138   | 72749  | 2     |
| M7155   | 7265   | 2     |
| M7185   | 72789  | 1     |
| M7195   | 7279   | 2     |
| M720    | 7286   | 1     |
| M722    | 72871  | 1     |
| M7265   | 72886  | 1     |
| M7296   | 72879  | 2     |
| M7299   | 7299   | 0     |
| M750    | 7260   | 2     |
| M751    | 72610  | 1     |
| M753    | 72611  | 2     |
| M754    | 7262   | 2     |
| M755    | 72610  | 1     |
| M758    | 7262   | 2     |
| M759    | 7262   | 1     |
| M760    | 7265   | 1     |
| M761    | 7265   | 1     |
| M765    | 72664  | 1     |
| M766    | 72671  | 1     |
| M779    | 72690  | 1     |
| M7900   | 7290   | 1     |
| M7902   | 7290   | 1     |
| M7907   | 7290   | 1     |
| M7908   | 7290   | 1     |
| M7909   | 7290   | 1     |
| M7910   | 7291   | 0     |
| M7911   | 7291   | 1     |
| M7915   | 7291   | 1     |
| M7916   | 7291   | 0     |
| M7918   | 7291   | 0     |
| M7919   | 7291   | 1     |
| M7920   | 7292   | 1     |
| M7926   | 7292   | 1     |
| M7927   | 3558   | 0     |
| M7928   | 7292   | 1     |
| M7929   | 7292   | 1     |
| M7960   | 7295   | 1     |
| M7961   | 7295   | 1     |
| M797    | 7291   | 1     |
| M7980   | 7299   | 1     |
| M7981   | 7299   | 1     |

| ICD10CA | ICD9CM | GRADE |
|---------|--------|-------|
| M7982   | 7299   | 1     |
| M7983   | 7299   | 1     |
| M7984   | 7299   | 1     |
| M7985   | 7299   | 1     |
| M7986   | 7299   | 1     |
| M7987   | 7299   | 1     |
| M7989   | 7299   | 1     |
| M7998   | 7299   | 0     |
| M8000   | 73319  | 2     |
| M8005   | 73314  | 2     |
| M8008   | 73319  | 2     |
| M8020   | 73303  | 0     |
| M8025   | 73303  | 0     |
| M8028   | 73303  | 0     |
| M8035   | 73314  | 2     |
| M8040   | 73319  | 2     |
| M8045   | 73314  | 2     |
| M8048   | 73309  | 0     |
| M8049   | 73310  | 2     |
| M8053   | 73312  | 2     |
| M8055   | 73314  | 2     |
| M8058   | 73319  | 2     |
| M8080   | 73309  | 0     |
| M8083   | 73312  | 2     |
| M8085   | 73314  | 2     |
| M8088   | 73319  | 2     |
| M8089   | 73309  | 0     |
| M8090   | 73319  | 2     |
| M8091   | 73300  | 0     |
| M8092   | 73311  | 2     |
| M8093   | 73312  | 2     |
| M8095   | 73314  | 2     |
| M8096   | 73316  | 2     |
| M8097   | 73316  | 2     |
| M8098   | 73319  | 2     |
| M8099   | 73310  | 2     |
| M810    | 73301  | 1     |
| M811    | 73300  | 1     |
| M812    | 73303  | 1     |
| M813    | 73309  | 0     |
| M814    | 73309  | 1     |
| M815    | 73302  | 1     |
| M816    | 73309  | 1     |

| ICD10CA | ICD9CM | GRADE |
|---------|--------|-------|
| M818    | 73309  | 1     |
| M819    | 73300  | 1     |
| M820    | 73300  | 1     |
| M821    | 73300  | 1     |
| M828    | 73309  | 3     |
| M831    | 2682   | 1     |
| M839    | 2682   | 1     |
| M8401   | 73381  | 1     |
| M8402   | 73381  | 1     |
| M8403   | 73381  | 1     |
| M8404   | 73381  | 1     |
| M8405   | 73381  | 1     |
| M8408   | 73381  | 1     |
| M8410   | 73382  | 1     |
| M8411   | 73382  | 1     |
| M8412   | 73382  | 1     |
| M8413   | 73382  | 1     |
| M8415   | 73382  | 1     |
| M8416   | 73382  | 1     |
| M8417   | 73382  | 1     |
| M8418   | 73382  | 1     |
| M8422   | 73382  | 1     |
| M8423   | 73382  | 0     |
| M8425   | 73382  | 1     |
| M8426   | 73382  | 0     |
| M8428   | 73382  | 1     |
| M8435   | 73314  | 2     |
| M8438   | 73319  | 2     |
| M8440   | 73310  | 1     |
| M8441   | 73319  | 1     |
| M8442   | 73311  | 1     |
| M8445   | 73314  | 2     |
| M8446   | 73316  | 0     |
| M8448   | 73319  | 2     |
| M8449   | 73310  | 1     |
| M8485   | 73399  | 1     |
| M8486   | 73399  | 1     |
| M8563   | 73329  | 1     |
| M8565   | 73329  | 1     |
| M8568   | 73329  | 1     |
| M8580   | 73399  | 1     |
| M8581   | 73399  | 1     |
| M8582   | 73399  | 1     |

| ICD10CA | ICD9CM | GRADE |
|---------|--------|-------|
| M8583   | 73399  | 1     |
| M8585   | 73399  | 1     |
| M8586   | 73399  | 1     |
| M8587   | 73399  | 1     |
| M8588   | 73399  | 1     |
| M8589   | 73399  | 1     |
| M8595   | 73390  | 1     |
| M8599   | 73390  | 1     |
| M8605   | 73005  | 1     |
| M8615   | 73005  | 1     |
| M8616   | 73006  | 1     |
| M8617   | 73007  | 1     |
| M8618   | 73008  | 1     |
| M8645   | 73015  | 1     |
| M8646   | 73016  | 1     |
| M8647   | 73017  | 1     |
| M8648   | 73018  | 1     |
| M8662   | 73012  | 0     |
| M8664   | 73014  | 1     |
| M8665   | 73015  | 1     |
| M8666   | 73016  | 1     |
| M8667   | 73017  | 1     |
| M8668   | 73018  | 1     |
| M8681   | 73021  | 0     |
| M8685   | 73025  | 1     |
| M8686   | 73026  | 1     |
| M8687   | 73027  | 1     |
| M8688   | 73028  | 1     |
| M8689   | 73020  | 0     |
| M8690   | 73029  | 2     |
| M8691   | 73021  | 2     |
| M8695   | 73025  | 2     |
| M8696   | 73026  | 2     |
| M8697   | 73027  | 2     |
| M8698   | 73028  | 2     |
| M8699   | 73020  | 2     |
| M8705   | 73342  | 2     |
| M8715   | 73015  | 1     |
| M8725   | 73015  | 1     |
| M8726   | 73016  | 1     |
| M8730   | 73019  | 1     |
| M8735   | 73015  | 1     |
| M8738   | 73018  | 1     |

| ICD10CA | ICD9CM | GRADE |
|---------|--------|-------|
| M8785   | 73015  | 1     |
| M8787   | 73017  | 1     |
| M8790   | 73019  | 2     |
| M8792   | 73012  | 2     |
| M8795   | 73015  | 2     |
| M8796   | 73016  | 2     |
| M8797   | 73017  | 2     |
| M8798   | 73018  | 2     |
| M8799   | 73010  | 2     |
| M880    | 7310   | 1     |
| M888    | 7310   | 1     |
| M889    | 7310   | 1     |
| M890    | 7337   | 0     |
| M8900   | 7337   | 2     |
| M8901   | 7337   | 2     |
| M8902   | 7337   | 2     |
| M8955   | 73399  | 1     |
| M8969   | 73070  | 3     |
| M8980   | 73399  | 0     |
| M8985   | 73399  | 2     |
| M8986   | 73399  | 2     |
| M8988   | 73399  | 2     |
| M8989   | 73390  | 0     |
| M8995   | 73390  | 1     |
| M8996   | 73390  | 1     |
| M8998   | 73390  | 1     |
| M8999   | 73390  | 1     |
| M900    | 73080  | 1     |
| M907    | 73319  | 3     |
| M908    | 7318   | 1     |
| M911    | 7321   | 1     |
| M918    | 7321   | 1     |
| M939    | 7329   | 1     |
| M940    | 7336   | 1     |
| M941    | 73399  | 0     |
| M9425   | 73392  | 1     |
| M9485   | 73399  | 1     |
| M9488   | 73399  | 1     |
| M9489   | 73390  | 0     |
| M959    | 7389   | 1     |
| M960    | 73382  | 2     |
| M966    | 99678  | 2     |
| M968    | 99799  | 2     |

| ICD10CA | ICD9CM | GRADE |
|---------|--------|-------|
| M969    | 99799  | 2     |
| N000    | 58089  | 2     |
| N017    | 5834   | 1     |
| N018    | 5834   | 1     |
| N020    | 5997   | 2     |
| N022    | 5997   | 2     |
| N028    | 5997   | 2     |
| N029    | 5997   | 2     |
| N031    | 58289  | 1     |
| N033    | 5820   | 1     |
| N035    | 5822   | 1     |
| N037    | 5820   | 1     |
| N038    | 5820   | 2     |
| N039    | 5829   | 2     |
| N048    | 58189  | 2     |
| N049    | 5819   | 2     |
| N052    | 5831   | 1     |
| N053    | 5830   | 1     |
| N055    | 5832   | 1     |
| N058    | 5830   | 1     |
| N059    | 5839   | 1     |
| N080    | 58181  | 2     |
| N081    | 58389  | 3     |
| N082    | 58389  | 3     |
| N083    | 25040  | 0     |
| N0831   | 58189  | 3     |
| N0832   | 58189  | 3     |
| N0833   | 58189  | 3     |
| N0834   | 58189  | 3     |
| N0835   | 58189  | 3     |
| N0838   | 58189  | 3     |
| N0839   | 58189  | 3     |
| N084    | 58181  | 2     |
| N085    | 58281  | 2     |
| N088    | 58389  | 3     |
| N10     | 59010  | 2     |
| N110    | 5900   | 0     |
| N111    | 59000  | 2     |
| N118    | 59000  | 2     |
| N119    | 59000  | 2     |
| N12     | 59080  | 1     |
| N130    | 591    | 1     |
| N131    | 591    | 1     |

| ICD10CA | ICD9CM | GRADE |
|---------|--------|-------|
| N132    | 591    | 1     |
| N133    | 591    | 2     |
| N134    | 5935   | 1     |
| N135    | 5933   | 2     |
| N136    | 59080  | 1     |
| N138    | 5996   | 2     |
| N139    | 5996   | 2     |
| N140    | 58389  | 1     |
| N141    | 58389  | 1     |
| N151    | 5902   | 1     |
| N158    | 59080  | 2     |
| N159    | 58389  | 0     |
| N160    | 59080  | 3     |
| N161    | 59080  | 3     |
| N162    | 59080  | 3     |
| N163    | 58181  | 2     |
| N164    | 59080  | 3     |
| N170    | 5845   | 1     |
| N171    | 5846   | 1     |
| N172    | 5847   | 1     |
| N178    | 5848   | 1     |
| N179    | 5849   | 1     |
| N180    | 585    | 0     |
| N181    | 5829   | 0     |
| N182    | 585    | 3     |
| N183    | 585    | 3     |
| N184    | 585    | 3     |
| N185    | 585    | 3     |
| N188    | 585    | 0     |
| N189    | 585    | 1     |
| N19     | 586    | 1     |
| N200    | 5920   | 1     |
| N201    | 5921   | 1     |
| N202    | 5920   | 2     |
| N209    | 5929   | 1     |
| N210    | 5941   | 2     |
| N211    | 5942   | 1     |
| N23     | 7880   | 1     |
| N250    | 5880   | 1     |
| N251    | 5881   | 1     |
| N258    | 5888   | 1     |
| N259    | 5889   | 1     |
| N280    | 59381  | 1     |



| ICD10CA | ICD9CM | GRADE |
|---------|--------|-------|
| N281    | 5932   | 1     |
| N2888   | 59389  | 1     |
| N289    | 5939   | 2     |
| N290    | 58381  | 2     |
| N291    | 59389  | 2     |
| N298    | 59389  | 3     |
| N300    | 5950   | 1     |
| N301    | 5951   | 1     |
| N302    | 5952   | 1     |
| N304    | 59582  | 1     |
| N308    | 59589  | 1     |
| N309    | 5959   | 1     |
| N311    | 59654  | 2     |
| N312    | 59653  | 1     |
| N318    | 59659  | 2     |
| N319    | 59654  | 2     |
| N320    | 5960   | 1     |
| N321    | 5961   | 1     |
| N322    | 5962   | 1     |
| N323    | 5963   | 1     |
| N324    | 5966   | 1     |
| N328    | 5968   | 1     |
| N329    | 5969   | 1     |
| N338    | 5968   | 0     |
| N340    | 5970   | 1     |
| N342    | 59789  | 1     |
| N350    | 5981   | 1     |
| N351    | 59800  | 2     |
| N358    | 5988   | 1     |
| N359    | 5989   | 1     |
| N360    | 5991   | 1     |
| N362    | 5993   | 1     |
| N363    | 5995   | 1     |
| N368    | 59984  | 2     |
| N370    | 59789  | 3     |
| N390    | 5990   | 1     |
| N391    | 7910   | 1     |
| N392    | 5936   | 1     |
| N393    | 78832  | 0     |
| N3930   | 78839  | 1     |
| N3939   | 6256   | 1     |
| N394    | 78839  | 2     |
| N398    | 59989  | 2     |

| ICD10CA | ICD9CM | GRADE |
|---------|--------|-------|
| N399    | 5999   | 1     |
| N40     | 600    | 1     |
| N410    | 6010   | 1     |
| N411    | 6011   | 1     |
| N412    | 6012   | 1     |
| N413    | 6013   | 1     |
| N418    | 6018   | 1     |
| N419    | 6019   | 1     |
| N420    | 6020   | 1     |
| N421    | 6021   | 1     |
| N4280   | 6028   | 1     |
| N4288   | 6028   | 1     |
| N429    | 6029   | 1     |
| N432    | 6038   | 0     |
| N433    | 6039   | 1     |
| N434    | 6081   | 1     |
| N4502   | 6040   | 1     |
| N4590   | 60490  | 1     |
| N4591   | 60490  | 1     |
| N4592   | 60490  | 1     |
| N470    | 605    | 1     |
| N471    | 605    | 1     |
| N478    | 605    | 1     |
| N480    | 6070   | 1     |
| N481    | 6071   | 1     |
| N4820   | 6072   | 1     |
| N4821   | 6072   | 1     |
| N4828   | 6072   | 1     |
| N483    | 6073   | 1     |
| N485    | 60789  | 1     |
| N486    | 60781  | 1     |
| N488    | 60789  | 1     |
| N489    | 6079   | 1     |
| N492    | 6084   | 1     |
| N493    | 60883  | 1     |
| N500    | 6083   | 0     |
| N5010   | 60883  | 1     |
| N5018   | 60883  | 1     |
| N508    | 60889  | 2     |
| N509    | 6089   | 1     |
| N512    | 6071   | 3     |
| N518    | 60881  | 0     |
| N600    | 6100   | 1     |

| ICD10CA | ICD9CM | GRADE |
|---------|--------|-------|
| N601    | 6101   | 0     |
| N608    | 6108   | 1     |
| N61     | 6110   | 1     |
| N62     | 6111   | 1     |
| N63     | 61172  | 1     |
| N643    | 6116   | 1     |
| N645    | 61179  | 1     |
| N648    | 6118   | 2     |
| N649    | 6119   | 1     |
| N730    | 6143   | 0     |
| N736    | 6146   | 1     |
| N738    | 6148   | 1     |
| N739    | 6149   | 1     |
| N760    | 61610  | 1     |
| N761    | 61610  | 1     |
| N762    | 61610  | 1     |
| N764    | 6164   | 1     |
| N765    | 6168   | 1     |
| N766    | 61650  | 1     |
| N768    | 61610  | 0     |
| N7688   | 61611  | 0     |
| N770    | 61651  | 1     |
| N771    | 61611  | 1     |
| N808    | 6178   | 1     |
| N810    | 6180   | 0     |
| N811    | 6180   | 1     |
| N812    | 6182   | 1     |
| N813    | 6183   | 1     |
| N814    | 6184   | 1     |
| N816    | 6180   | 1     |
| N818    | 6188   | 2     |
| N819    | 6189   | 1     |
| N820    | 6190   | 1     |
| N821    | 6190   | 1     |
| N822    | 6191   | 1     |
| N823    | 6191   | 1     |
| N828    | 6198   | 0     |
| N829    | 6199   | 1     |
| N832    | 6202   | 1     |
| N838    | 6208   | 2     |
| N839    | 6209   | 1     |
| N841    | 6227   | 1     |
| N850    | 6213   | 1     |

| ICD10CA | ICD9CM | GRADE |
|---------|--------|-------|
| N851    | 6213   | 1     |
| N86     | 6220   | 1     |
| N895    | 6232   | 1     |
| N896    | 6233   | 0     |
| N898    | 6238   | 2     |
| N899    | 6239   | 1     |
| N900    | 6248   | 2     |
| N904    | 6240   | 1     |
| N905    | 6241   | 1     |
| N906    | 6243   | 1     |
| N907    | 6248   | 1     |
| N908    | 6248   | 2     |
| N909    | 6239   | 0     |
| N920    | 6262   | 0     |
| N930    | 6267   | 1     |
| N938    | 6268   | 1     |
| N939    | 6269   | 1     |
| N948    | 6258   | 1     |
| N950    | 6271   | 1     |
| N952    | 6273   | 1     |
| N990    | 9975   | 1     |
| N991    | 5982   | 1     |
| N993    | 6185   | 1     |
| N994    | 6146   | 2     |
| N9950   | 9975   | 1     |
| N9951   | 9975   | 1     |
| N9952   | 9975   | 1     |
| N998    | 9975   | 2     |
| N999    | 9975   | 2     |
| P140    | 7676   | 1     |
| Q039    | 7423   | 1     |
| Q055    | 74191  | 1     |
| Q057    | 74193  | 1     |
| Q059    | 74190  | 2     |
| Q061    | 74259  | 0     |
| Q063    | 74259  | 1     |
| Q068    | 74259  | 1     |
| Q070    | 74100  | 2     |
| Q181    | 74446  | 0     |
| Q210    | 7454   | 1     |
| Q211    | 7455   | 1     |
| Q213    | 7452   | 1     |
| Q218    | 7454   | 2     |

| ICD10CA | ICD9CM | GRADE |
|---------|--------|-------|
| Q225    | 7462   | 1     |
| Q231    | 7464   | 1     |
| Q239    | 7469   | 0     |
| Q245    | 74685  | 1     |
| Q248    | 74689  | 2     |
| Q249    | 7469   | 1     |
| Q250    | 7470   | 1     |
| Q253    | 74722  | 1     |
| Q256    | 7473   | 1     |
| Q2731   | 74764  | 1     |
| Q2732   | 74761  | 1     |
| Q282    | 74781  | 1     |
| Q283    | 74789  | 2     |
| Q333    | 7485   | 1     |
| Q334    | 74861  | 1     |
| Q339    | 74860  | 1     |
| Q359    | 74900  | 1     |
| Q385    | 75026  | 2     |
| Q394    | 7503   | 1     |
| Q396    | 7504   | 1     |
| Q428    | 7512   | 1     |
| Q431    | 7513   | 1     |
| Q433    | 7514   | 1     |
| Q438    | 7515   | 1     |
| Q446    | 75162  | 0     |
| Q501    | 7520   | 1     |
| Q525    | 75249  | 1     |
| Q529    | 7529   | 2     |
| Q531    | 75251  | 1     |
| Q540    | 75261  | 1     |
| Q600    | 7530   | 1     |
| Q602    | 7530   | 0     |
| Q605    | 7530   | 1     |
| Q611    | 75314  | 0     |
| Q612    | 75313  | 1     |
| Q613    | 75312  | 1     |
| Q614    | 75315  | 0     |
| Q615    | 75316  | 0     |
| Q619    | 75310  | 1     |
| Q623    | 75323  | 1     |
| Q630    | 7533   | 1     |
| Q631    | 7533   | 1     |
| Q638    | 7533   | 1     |

| ICD10CA | ICD9CM | GRADE |
|---------|--------|-------|
| Q640    | 75262  | 1     |
| Q650    | 75430  | 1     |
| Q652    | 75430  | 1     |
| Q658    | 75563  | 2     |
| Q665    | 75461  | 1     |
| Q667    | 75471  | 1     |
| Q668    | 75479  | 2     |
| Q669    | 75479  | 1     |
| Q675    | 7542   | 1     |
| Q676    | 75481  | 1     |
| Q711    | 75523  | 0     |
| Q712    | 75521  | 1     |
| Q741    | 75564  | 0     |
| Q742    | 75569  | 1     |
| Q749    | 7559   | 1     |
| Q751    | 7560   | 0     |
| Q761    | 75616  | 1     |
| Q766    | 7563   | 1     |
| Q774    | 7564   | 1     |
| Q780    | 75651  | 1     |
| Q782    | 75652  | 1     |
| Q788    | 75653  | 1     |
| Q790    | 7566   | 1     |
| Q791    | 7566   | 1     |
| Q809    | 7571   | 1     |
| Q822    | 75733  | 1     |
| Q828    | 75739  | 2     |
| Q850    | 23771  | 1     |
| Q851    | 7595   | 1     |
| Q860    | 76071  | 1     |
| Q872    | 75989  | 1     |
| Q874    | 75982  | 1     |
| Q878    | 75989  | 1     |
| Q890    | 7590   | 1     |
| Q891    | 7591   | 1     |
| Q893    | 7593   | 1     |
| Q909    | 7580   | 1     |
| Q935    | 75889  | 0     |
| Q992    | 75983  | 0     |
| Q999    | 7589   | 1     |
| R000    | 7850   | 1     |
| R001    | 42789  | 1     |
| R002    | 7851   | 1     |

| <b>ICD10CA</b> | <b>ICD9CM</b> | <b>GRADE</b> |
|----------------|---------------|--------------|
| R008           | 7853          | 1            |
| R010           | 7852          | 1            |
| R011           | 7852          | 2            |
| R02            | 7854          | 1            |
| R030           | 7962          | 1            |
| R031           | 7963          | 1            |
| R040           | 7847          | 1            |
| R042           | 7863          | 1            |
| R048           | 7863          | 2            |
| R05            | 7862          | 1            |
| R060           | 78605         | 1            |
| R061           | 7861          | 1            |
| R062           | 78609         | 1            |
| R063           | 78604         | 1            |
| R064           | 78601         | 1            |
| R066           | 7868          | 1            |
| R068           | 78609         | 2            |
| R070           | 7841          | 1            |
| R071           | 78652         | 1            |
| R072           | 78651         | 1            |
| R073           | 78659         | 1            |
| R074           | 78650         | 1            |
| R090           | 7990          | 1            |
| R091           | 5110          | 1            |
| R092           | 7991          | 1            |
| R093           | 7864          | 1            |
| R098           | 7867          | 2            |
| R100           | 78907         | 1            |
| R1010          | 78901         | 1            |
| R1011          | 78902         | 1            |
| R1012          | 78906         | 1            |
| R1019          | 78909         | 1            |
| R102           | 78909         | 2            |
| R1030          | 78903         | 1            |
| R1031          | 78904         | 1            |
| R1032          | 78905         | 1            |
| R1039          | 78909         | 1            |
| R104           | 78900         | 1            |
| R110           | 78703         | 1            |
| R111           | 78702         | 1            |
| R112           | 78703         | 1            |
| R113           | 78701         | 1            |
| R12            | 7871          | 1            |

| ICD10CA | ICD9CM | GRADE |
|---------|--------|-------|
| R130    | 7872   | 1     |
| R132    | 7872   | 1     |
| R138    | 7872   | 1     |
| R14     | 7873   | 1     |
| R15     | 7876   | 1     |
| R160    | 7891   | 1     |
| R161    | 7892   | 1     |
| R162    | 7891   | 2     |
| R17     | 7824   | 1     |
| R18     | 7895   | 1     |
| R190    | 78937  | 2     |
| R194    | 78799  | 1     |
| R195    | 7877   | 0     |
| R1950   | 7877   | 1     |
| R1958   | 7877   | 1     |
| R198    | 78799  | 1     |
| R202    | 7820   | 1     |
| R208    | 7820   | 1     |
| R21     | 7821   | 1     |
| R220    | 7822   | 1     |
| R221    | 7822   | 1     |
| R222    | 7822   | 1     |
| R223    | 7822   | 1     |
| R224    | 7822   | 1     |
| R229    | 7822   | 1     |
| R230    | 7825   | 1     |
| R232    | 78262  | 1     |
| R233    | 7827   | 1     |
| R234    | 7828   | 1     |
| R238    | 7828   | 1     |
| R251    | 7810   | 1     |
| R252    | 7810   | 2     |
| R253    | 7810   | 1     |
| R258    | 7810   | 1     |
| R260    | 7812   | 1     |
| R261    | 7812   | 1     |
| R262    | 71970  | 1     |
| R263    | 71970  | 3     |
| R2681   | 7812   | 0     |
| R2682   | 7812   | 1     |
| R2688   | 7812   | 1     |
| R270    | 7813   | 1     |
| R278    | 7813   | 1     |



| ICD10CA | ICD9CM | GRADE |
|---------|--------|-------|
| R291    | 7816   | 1     |
| R292    | 7961   | 0     |
| R296    | 7819   | 2     |
| R298    | 7819   | 1     |
| R300    | 7881   | 1     |
| R309    | 7881   | 1     |
| R310    | 5997   | 1     |
| R311    | 5997   | 1     |
| R318    | 5997   | 1     |
| R32     | 78830  | 1     |
| R33     | 78829  | 2     |
| R34     | 7885   | 1     |
| R350    | 78843  | 1     |
| R358    | 78842  | 1     |
| R3910   | 78869  | 1     |
| R3911   | 78862  | 1     |
| R3912   | 78821  | 1     |
| R3913   | 78869  | 1     |
| R3914   | 78835  | 1     |
| R3918   | 78869  | 1     |
| R392    | 7889   | 1     |
| R398    | 7889   | 1     |
| R400    | 78009  | 1     |
| R401    | 78009  | 1     |
| R4020   | 78003  | 1     |
| R4029   | 78001  | 1     |
| R410    | 2989   | 2     |
| R411    | 7809   | 1     |
| R412    | 7809   | 1     |
| R413    | 7809   | 1     |
| R416    | 7818   | 1     |
| R4180   | 78002  | 1     |
| R4188   | 7809   | 1     |
| R42     | 7804   | 1     |
| R438    | 7811   | 1     |
| R440    | 7801   | 1     |
| R441    | 36816  | 3     |
| R442    | 7801   | 1     |
| R443    | 7801   | 1     |
| R448    | 7819   | 3     |
| R451    | 7992   | 3     |
| R452    | 7998   | 3     |
| R453    | 7998   | 3     |

| ICD10CA | ICD9CM | GRADE |
|---------|--------|-------|
| R454    | 7998   | 3     |
| R455    | 7998   | 3     |
| R456    | 7998   | 3     |
| R458    | 7998   | 3     |
| R460    | 7998   | 3     |
| R462    | 7998   | 3     |
| R465    | 7998   | 3     |
| R467    | 7998   | 3     |
| R4680   | 7809   | 3     |
| R4688   | 7809   | 3     |
| R470    | 7845   | 2     |
| R471    | 7845   | 1     |
| R478    | 7845   | 1     |
| R480    | 78461  | 1     |
| R482    | 78469  | 1     |
| R488    | 78469  | 1     |
| R490    | 78449  | 1     |
| R491    | 78441  | 1     |
| R492    | 78449  | 1     |
| R498    | 78449  | 1     |
| R500    | 7806   | 0     |
| R501    | 7806   | 0     |
| R502    | 7806   | 1     |
| R508    | 7806   | 1     |
| R509    | 7806   | 1     |
| R51     | 7840   | 1     |
| R520    | 7809   | 1     |
| R521    | 7809   | 1     |
| R522    | 7809   | 1     |
| R529    | 7809   | 1     |
| R53     | 78079  | 1     |
| R54     | 797    | 1     |
| R55     | 7802   | 1     |
| R560    | 78031  | 0     |
| R568    | 7803   | 0     |
| R5680   | 78039  | 2     |
| R5688   | 78039  | 1     |
| R570    | 78551  | 1     |
| R571    | 78559  | 1     |
| R572    | 0389   | 2     |
| R578    | 78559  | 1     |
| R579    | 78550  | 1     |
| R58     | 4590   | 1     |

| ICD10CA | ICD9CM | GRADE |
|---------|--------|-------|
| R590    | 7856   | 1     |
| R591    | 7856   | 1     |
| R599    | 7856   | 0     |
| R600    | 7823   | 1     |
| R601    | 7823   | 1     |
| R609    | 7823   | 1     |
| R619    | 7808   | 1     |
| R628    | 7834   | 2     |
| R629    | 7834   | 1     |
| R630    | 7830   | 1     |
| R631    | 7835   | 1     |
| R633    | 7833   | 1     |
| R634    | 7832   | 1     |
| R636    | 7839   | 3     |
| R638    | 7839   | 1     |
| R64     | 7994   | 1     |
| R650    | 7998   | 3     |
| R651    | 7998   | 3     |
| R652    | 7998   | 3     |
| R653    | 7998   | 3     |
| R659    | 7998   | 3     |
| R680    | 7809   | 1     |
| R682    | 5277   | 3     |
| R688    | 7809   | 1     |
| R69     | 7999   | 1     |
| R700    | 7901   | 1     |
| R71     | 7900   | 1     |
| R72     | 2888   | 3     |
| R730    | 7902   | 1     |
| R73800  | 2719   | 3     |
| R73801  | 2719   | 3     |
| R73802  | 2719   | 3     |
| R73811  | 2719   | 3     |
| R73812  | 2719   | 3     |
| R739    | 7906   | 1     |
| R740    | 7904   | 1     |
| R748    | 7905   | 1     |
| R749    | 7905   | 1     |
| R75     | V08    | 0     |
| R760    | 79579  | 1     |
| R761    | 7955   | 1     |
| R768    | 79579  | 1     |
| R770    | 79579  | 3     |

| ICD10CA | ICD9CM | GRADE |
|---------|--------|-------|
| R771    | 2738   | 3     |
| R778    | 79099  | 3     |
| R781    | 7960   | 2     |
| R785    | 7960   | 2     |
| R788    | 79099  | 1     |
| R789    | 79099  | 1     |
| R790    | 7906   | 1     |
| R798    | 7906   | 1     |
| R799    | 7906   | 1     |
| R80     | 7910   | 1     |
| R821    | 7913   | 1     |
| R824    | 7916   | 1     |
| R827    | 7919   | 1     |
| R829    | 7919   | 1     |
| R845    | 7929   | 2     |
| R855    | 7969   | 0     |
| R864    | 7969   | 0     |
| R865    | 7922   | 1     |
| R891    | 7969   | 0     |
| R895    | 7929   | 2     |
| R900    | 7842   | 2     |
| R908    | 79401  | 1     |
| R91     | 7931   | 1     |
| R930    | 7930   | 0     |
| R931    | 7932   | 1     |
| R932    | 7933   | 1     |
| R933    | 7934   | 1     |
| R934    | 7935   | 1     |
| R935    | 7936   | 1     |
| R937    | 7937   | 1     |
| R938    | 7939   | 2     |
| R940    | 79402  | 1     |
| R941    | 79410  | 0     |
| R942    | 7942   | 1     |
| R943    | 79430  | 0     |
| R9430   | 79439  | 1     |
| R9431   | 79439  | 1     |
| R9438   | 79439  | 1     |
| R944    | 7944   | 1     |
| R945    | 7948   | 1     |
| R946    | 7945   | 1     |
| R947    | 79439  | 0     |
| R948    | 7949   | 2     |

| ICD10CA | ICD9CM | GRADE |
|---------|--------|-------|
| R960    | 7981   | 1     |
| R961    | 7982   | 1     |
| R98     | 7989   | 1     |
| R99     | 7999   | 1     |
| S000    | 9108   | 2     |
| S001    | 9211   | 2     |
| S002    | 9180   | 1     |
| S003    | 9108   | 2     |
| S004    | 9108   | 2     |
| S005    | 9108   | 2     |
| S007    | 9108   | 2     |
| S008    | 9108   | 2     |
| S009    | 9108   | 2     |
| S0100   | 8730   | 1     |
| S0101   | 8731   | 1     |
| S0110   | 8700   | 1     |
| S0120   | 87320  | 1     |
| S0121   | 87330  | 0     |
| S0130   | 87200  | 1     |
| S0131   | 8729   | 0     |
| S0140   | 87341  | 1     |
| S0150   | 87343  | 1     |
| S0151   | 87353  | 0     |
| S0170   | 8738   | 1     |
| S0180   | 8738   | 1     |
| S0181   | 8739   | 0     |
| S0190   | 8738   | 1     |
| S02000  | 80001  | 1     |
| S02001  | 80051  | 1     |
| S02100  | 80101  | 1     |
| S02101  | 8015   | 0     |
| S02200  | 8020   | 1     |
| S02201  | 8021   | 1     |
| S02300  | 8026   | 1     |
| S02301  | 8027   | 0     |
| S02400  | 8024   | 1     |
| S02410  | 8024   | 1     |
| S02420  | 8024   | 1     |
| S02430  | 8024   | 1     |
| S02440  | 8024   | 1     |
| S02480  | 8024   | 1     |
| S02481  | 8025   | 1     |
| S02490  | 8024   | 1     |

| ICD10CA | ICD9CM | GRADE |
|---------|--------|-------|
| S025    | 87363  | 1     |
| S02600  | 80220  | 1     |
| S02610  | 80224  | 1     |
| S02620  | 80228  | 1     |
| S02670  | 80229  | 1     |
| S02700  | 80401  | 1     |
| S02701  | 80451  | 1     |
| S02890  | 8028   | 2     |
| S02900  | 80300  | 2     |
| S030    | 8300   | 2     |
| S032    | 87363  | 2     |
| S0458   | 9514   | 1     |
| S050    | 9212   | 2     |
| S051    | 9213   | 2     |
| S052    | 8711   | 0     |
| S053    | 8710   | 2     |
| S058    | 9219   | 2     |
| S059    | 9219   | 2     |
| S060    | 8500   | 1     |
| S06000  | 85001  | 0     |
| S06010  | 85012  | 0     |
| S06200  | 85401  | 0     |
| S06210  | 85402  | 0     |
| S06220  | 85403  | 0     |
| S06230  | 85404  | 0     |
| S06240  | 85405  | 0     |
| S0625   | 85181  | 1     |
| S0626   | 85191  | 1     |
| S06300  | 85401  | 0     |
| S06310  | 85402  | 0     |
| S06340  | 85405  | 0     |
| S0635   | 85401  | 1     |
| S06390  | 85406  | 0     |
| S064    | 85241  | 1     |
| S065    | 85221  | 1     |
| S06500  | 85221  | 0     |
| S06510  | 85222  | 0     |
| S06530  | 85224  | 0     |
| S06540  | 85225  | 0     |
| S06541  | 85235  | 0     |
| S06590  | 85226  | 0     |
| S066    | 85201  | 1     |
| S06600  | 85201  | 0     |

| ICD10CA | ICD9CM | GRADE |
|---------|--------|-------|
| S06610  | 85202  | 0     |
| S06640  | 85205  | 0     |
| S06690  | 85206  | 0     |
| S06800  | 85401  | 0     |
| S06830  | 85404  | 0     |
| S0685   | 85301  | 1     |
| S0686   | 85311  | 1     |
| S069    | 85401  | 2     |
| S06900  | 85401  | 0     |
| S090    | 90089  | 2     |
| S0918   | 95901  | 0     |
| S097    | 85400  | 2     |
| S098    | 85400  | 2     |
| S099    | 85409  | 2     |
| S101    | 9108   | 2     |
| S108    | 9108   | 2     |
| S1121   | 8745   | 1     |
| S1190   | 8748   | 0     |
| S12000  | 80501  | 1     |
| S12100  | 80502  | 1     |
| S12200  | 80503  | 1     |
| S12210  | 80505  | 1     |
| S12700  | 80508  | 1     |
| S12900  | 80500  | 1     |
| S131    | 83900  | 2     |
| S133    | 83908  | 2     |
| S140    | 95204  | 0     |
| S1411   | 95203  | 1     |
| S1418   | 95204  | 1     |
| S1438   | 9534   | 1     |
| S151    | 90089  | 2     |
| S159    | 9009   | 1     |
| S198    | 95909  | 1     |
| S199    | 95909  | 1     |
| S200    | 9220   | 1     |
| S201    | 9118   | 2     |
| S202    | 9221   | 1     |
| S203    | 9118   | 2     |
| S204    | 9118   | 2     |
| S208    | 9118   | 2     |
| S2110   | 8750   | 1     |
| S2120   | 8760   | 2     |
| S2190   | 8750   | 0     |

| ICD10CA | ICD9CM | GRADE |
|---------|--------|-------|
| S22000  | 8052   | 1     |
| S22010  | 8052   | 1     |
| S22011  | 8053   | 1     |
| S22090  | 8052   | 1     |
| S22100  | 8052   | 1     |
| S22200  | 8072   | 1     |
| S22300  | 80700  | 1     |
| S22400  | 80704  | 1     |
| S22401  | 80714  | 1     |
| S22410  | 80705  | 1     |
| S22490  | 80709  | 1     |
| S22500  | 8074   | 1     |
| S22800  | 80700  | 0     |
| S22900  | 8072   | 2     |
| S232    | 83969  | 0     |
| S2410   | 95211  | 1     |
| S2411   | 3369   | 0     |
| S2418   | 95214  | 1     |
| S250    | 9010   | 1     |
| S26000  | 86100  | 1     |
| S26800  | 86101  | 1     |
| S26810  | 86102  | 1     |
| S26880  | 86100  | 0     |
| S26890  | 86100  | 1     |
| S27000  | 8600   | 1     |
| S27100  | 8602   | 1     |
| S27101  | 8603   | 1     |
| S27200  | 8604   | 1     |
| S27201  | 8605   | 1     |
| S27300  | 86121  | 1     |
| S27380  | 86120  | 1     |
| S27680  | 86229  | 1     |
| S27690  | 86229  | 1     |
| S27800  | 8620   | 1     |
| S27810  | 86222  | 1     |
| S27850  | 8620   | 1     |
| S27860  | 86222  | 1     |
| S27890  | 86229  | 1     |
| S297    | 9598   | 0     |
| S298    | 9591   | 0     |
| S299    | 9591   | 1     |
| S300    | 92232  | 1     |
| S301    | 9222   | 1     |



| ICD10CA | ICD9CM | GRADE |
|---------|--------|-------|
| S3020   | 9224   | 1     |
| S3021   | 9224   | 1     |
| S3022   | 9224   | 1     |
| S3028   | 9224   | 1     |
| S3080   | 9118   | 1     |
| S3081   | 9118   | 1     |
| S3082   | 9118   | 1     |
| S3083   | 9118   | 1     |
| S3085   | 9118   | 0     |
| S3088   | 9118   | 1     |
| S309    | 9118   | 2     |
| S31000  | 8760   | 1     |
| S31001  | 8761   | 0     |
| S31101  | 8793   | 1     |
| S31130  | 8794   | 1     |
| S31131  | 8793   | 0     |
| S31190  | 8792   | 1     |
| S31191  | 8793   | 1     |
| S31200  | 8780   | 1     |
| S31300  | 8782   | 1     |
| S31400  | 8784   | 1     |
| S31701  | 8797   | 2     |
| S31800  | 8792   | 1     |
| S32000  | 8054   | 1     |
| S32010  | 8054   | 1     |
| S32020  | 8054   | 1     |
| S32030  | 8054   | 1     |
| S32040  | 8054   | 1     |
| S32090  | 8054   | 1     |
| S32100  | 8056   | 1     |
| S32101  | 8057   | 1     |
| S32200  | 8056   | 1     |
| S32300  | 80841  | 1     |
| S32400  | 8080   | 1     |
| S32401  | 8081   | 1     |
| S32500  | 8082   | 1     |
| S32501  | 8083   | 1     |
| S32700  | 80849  | 1     |
| S32701  | 80859  | 1     |
| S32800  | 8088   | 1     |
| S332    | 83949  | 2     |
| S333    | 83961  | 2     |
| S334    | 9591   | 0     |

| ICD10CA | ICD9CM | GRADE |
|---------|--------|-------|
| S337    | 8472   | 2     |
| S3418   | 9522   | 1     |
| S3428   | 9533   | 1     |
| S3468   | 9565   | 2     |
| S3488   | 9565   | 2     |
| S352    | 90220  | 2     |
| S355    | 90256  | 2     |
| S358    | 90289  | 2     |
| S36000  | 86501  | 1     |
| S36010  | 86502  | 1     |
| S36020  | 86503  | 1     |
| S36030  | 86504  | 1     |
| S36090  | 86509  | 1     |
| S36091  | 86519  | 1     |
| S36110  | 86402  | 1     |
| S36150  | 86400  | 1     |
| S36170  | 86802  | 0     |
| S36190  | 86802  | 1     |
| S36210  | 8676   | 0     |
| S36240  | 86384  | 1     |
| S36290  | 86384  | 1     |
| S36310  | 8630   | 1     |
| S36410  | 86321  | 1     |
| S36460  | 86320  | 0     |
| S36461  | 86339  | 1     |
| S36490  | 86320  | 0     |
| S36510  | 86340  | 1     |
| S36511  | 86350  | 1     |
| S36600  | 86345  | 1     |
| S36610  | 86345  | 1     |
| S36690  | 86345  | 1     |
| S36800  | 86800  | 1     |
| S36810  | 86800  | 1     |
| S36890  | 86800  | 0     |
| S36910  | 86800  | 1     |
| S36990  | 86800  | 0     |
| S37000  | 86600  | 1     |
| S37010  | 86602  | 0     |
| S37090  | 86600  | 1     |
| S37111  | 8673   | 0     |
| S37190  | 8672   | 1     |
| S37200  | 8670   | 1     |
| S37210  | 8670   | 1     |

| ICD10CA | ICD9CM | GRADE |
|---------|--------|-------|
| S37211  | 8671   | 0     |
| S37290  | 8670   | 1     |
| S37300  | 8670   | 1     |
| S37310  | 8670   | 1     |
| S37390  | 8670   | 1     |
| S37700  | 8678   | 0     |
| S37800  | 8676   | 1     |
| S37900  | 8678   | 1     |
| S381    | 92611  | 2     |
| S3908   | 8479   | 2     |
| S397    | 9591   | 0     |
| S398    | 9591   | 2     |
| S399    | 9591   | 2     |
| S400    | 92300  | 2     |
| S407    | 9128   | 2     |
| S408    | 9128   | 2     |
| S409    | 9128   | 2     |
| S4100   | 88000  | 1     |
| S4101   | 88010  | 1     |
| S4110   | 88003  | 1     |
| S4170   | 88009  | 1     |
| S42000  | 81001  | 1     |
| S42010  | 81012  | 1     |
| S42020  | 81003  | 1     |
| S42090  | 81000  | 1     |
| S42100  | 81101  | 1     |
| S42110  | 81102  | 1     |
| S42120  | 81103  | 1     |
| S42180  | 81109  | 1     |
| S42190  | 81100  | 1     |
| S42200  | 81201  | 1     |
| S42201  | 81211  | 1     |
| S42210  | 81200  | 1     |
| S42220  | 81203  | 1     |
| S42221  | 81213  | 1     |
| S42280  | 81200  | 1     |
| S42281  | 81210  | 1     |
| S42290  | 81200  | 1     |
| S42291  | 81210  | 1     |
| S42300  | 81221  | 1     |
| S42301  | 81231  | 1     |
| S42390  | 81220  | 1     |
| S42391  | 81230  | 1     |

| ICD10CA | ICD9CM | GRADE |
|---------|--------|-------|
| S42400  | 81241  | 1     |
| S42401  | 81251  | 1     |
| S42410  | 81242  | 1     |
| S42411  | 81252  | 1     |
| S42420  | 81243  | 1     |
| S42421  | 81253  | 1     |
| S42430  | 81244  | 1     |
| S42480  | 81240  | 1     |
| S42481  | 81250  | 1     |
| S42490  | 81240  | 1     |
| S42700  | 8180   | 2     |
| S42800  | 81209  | 1     |
| S42900  | 81200  | 1     |
| S43000  | 83101  | 1     |
| S43010  | 83102  | 1     |
| S43020  | 83103  | 1     |
| S43090  | 83100  | 1     |
| S43100  | 83104  | 1     |
| S43200  | 83961  | 1     |
| S43380  | 83100  | 1     |
| S43402  | 8409   | 1     |
| S436    | 84849  | 2     |
| S4379   | 8409   | 1     |
| S4408   | 9552   | 1     |
| S4418   | 9551   | 1     |
| S4428   | 9553   | 1     |
| S451    | 9031   | 1     |
| S458    | 9038   | 1     |
| S4600   | 88020  | 2     |
| S4608   | 9592   | 1     |
| S4610   | 8408   | 0     |
| S4618   | 9592   | 1     |
| S4620   | 88020  | 2     |
| S4628   | 9592   | 1     |
| S4630   | 9592   | 1     |
| S4680   | 8408   | 0     |
| S4688   | 9592   | 1     |
| S4698   | 9592   | 1     |
| S481    | 88000  | 2     |
| S497    | 9592   | 1     |
| S498    | 9592   | 1     |
| S499    | 9592   | 1     |
| S500    | 92311  | 2     |

| ICD10CA | ICD9CM | GRADE |
|---------|--------|-------|
| S501    | 92311  | 2     |
| S507    | 9138   | 2     |
| S508    | 9138   | 2     |
| S509    | 9138   | 2     |
| S5100   | 88101  | 1     |
| S5101   | 88111  | 1     |
| S5170   | 8840   | 1     |
| S5171   | 8841   | 1     |
| S5180   | 88100  | 1     |
| S5181   | 88110  | 1     |
| S5190   | 88100  | 1     |
| S5191   | 88110  | 1     |
| S52000  | 81301  | 1     |
| S52001  | 81311  | 1     |
| S52010  | 81302  | 1     |
| S52020  | 81303  | 1     |
| S52021  | 81313  | 1     |
| S52080  | 81304  | 1     |
| S52090  | 81300  | 1     |
| S52091  | 81310  | 1     |
| S52100  | 81305  | 1     |
| S52110  | 81306  | 1     |
| S52120  | 81308  | 1     |
| S52180  | 81307  | 1     |
| S52190  | 81307  | 1     |
| S52200  | 81322  | 1     |
| S52201  | 81332  | 1     |
| S52300  | 81321  | 1     |
| S52301  | 81331  | 1     |
| S52400  | 81323  | 1     |
| S52401  | 81333  | 1     |
| S52500  | 81341  | 1     |
| S52501  | 81351  | 1     |
| S52580  | 81342  | 1     |
| S52581  | 81352  | 1     |
| S52590  | 81340  | 1     |
| S52591  | 81350  | 1     |
| S52600  | 81344  | 1     |
| S52601  | 81354  | 1     |
| S52700  | 81380  | 1     |
| S52701  | 81390  | 1     |
| S52800  | 81380  | 1     |
| S52801  | 81390  | 1     |

| ICD10CA | ICD9CM | GRADE |
|---------|--------|-------|
| S52900  | 81380  | 1     |
| S530    | 83209  | 0     |
| S53110  | 83202  | 1     |
| S53180  | 83209  | 0     |
| S53190  | 83200  | 1     |
| S5348   | 8418   | 1     |
| S5349   | 8419   | 1     |
| S5408   | 9552   | 1     |
| S5418   | 9551   | 1     |
| S5488   | 9557   | 1     |
| S551    | 9032   | 1     |
| S552    | 9039   | 2     |
| S558    | 9038   | 1     |
| S5620   | 88120  | 2     |
| S5650   | 88120  | 2     |
| S597    | 9593   | 1     |
| S598    | 9593   | 1     |
| S599    | 9593   | 1     |
| S600    | 9233   | 1     |
| S602    | 92320  | 2     |
| S608    | 9138   | 2     |
| S609    | 9138   | 2     |
| S6100   | 8830   | 1     |
| S6101   | 8831   | 1     |
| S612    | 88102  | 1     |
| S6171   | 8841   | 1     |
| S6180   | 88102  | 1     |
| S6181   | 8841   | 0     |
| S6190   | 88102  | 1     |
| S6191   | 88112  | 1     |
| S62000  | 81401  | 1     |
| S62100  | 81402  | 1     |
| S62110  | 81403  | 1     |
| S62130  | 81405  | 1     |
| S62140  | 81406  | 1     |
| S62180  | 81409  | 1     |
| S62190  | 81400  | 1     |
| S62200  | 81501  | 1     |
| S62201  | 81511  | 1     |
| S62210  | 81503  | 1     |
| S62220  | 81504  | 1     |
| S62270  | 81509  | 0     |
| S62290  | 81500  | 1     |

| ICD10CA | ICD9CM | GRADE |
|---------|--------|-------|
| S62300  | 81502  | 1     |
| S62310  | 81503  | 1     |
| S62311  | 81513  | 1     |
| S62320  | 81504  | 1     |
| S62321  | 81514  | 1     |
| S62370  | 81509  | 1     |
| S62390  | 81500  | 1     |
| S62391  | 81510  | 0     |
| S62400  | 81509  | 1     |
| S62410  | 81503  | 1     |
| S62420  | 81504  | 1     |
| S62490  | 81500  | 1     |
| S62500  | 81601  | 1     |
| S62510  | 81602  | 1     |
| S62511  | 81612  | 1     |
| S62590  | 81600  | 1     |
| S62600  | 81601  | 1     |
| S62601  | 81611  | 1     |
| S62610  | 81602  | 1     |
| S62670  | 81603  | 1     |
| S62690  | 81600  | 1     |
| S62691  | 81610  | 1     |
| S62700  | 81603  | 1     |
| S62800  | 81400  | 1     |
| S62801  | 81410  | 1     |
| S63000  | 83301  | 1     |
| S63020  | 83303  | 1     |
| S63080  | 83309  | 1     |
| S63090  | 83300  | 1     |
| S63100  | 83401  | 1     |
| S63110  | 83402  | 1     |
| S63111  | 83412  | 1     |
| S63190  | 83400  | 1     |
| S634    | 84212  | 1     |
| S6358   | 84209  | 1     |
| S6359   | 84200  | 1     |
| S6371   | 84210  | 0     |
| S6378   | 84219  | 1     |
| S6410   | 9551   | 0     |
| S6418   | 9551   | 1     |
| S6630   | 8832   | 2     |
| S6638   | 9595   | 2     |
| S6660   | 84209  | 0     |

| ICD10CA | ICD9CM | GRADE |
|---------|--------|-------|
| S6670   | 88122  | 2     |
| S6690   | 88122  | 2     |
| S670    | 9273   | 1     |
| S681    | 8860   | 2     |
| S682    | 8860   | 2     |
| S698    | 9593   | 2     |
| S699    | 9593   | 2     |
| S700    | 92400  | 2     |
| S701    | 92400  | 2     |
| S707    | 9168   | 2     |
| S708    | 9168   | 2     |
| S709    | 9168   | 2     |
| S7100   | 8900   | 1     |
| S7101   | 8901   | 1     |
| S7110   | 8900   | 1     |
| S7111   | 8901   | 1     |
| S7170   | 8940   | 0     |
| S72000  | 82001  | 1     |
| S72001  | 82011  | 1     |
| S72010  | 82003  | 1     |
| S72011  | 82013  | 1     |
| S72080  | 82009  | 1     |
| S72081  | 82019  | 1     |
| S72090  | 82000  | 1     |
| S72091  | 82010  | 1     |
| S72100  | 82021  | 1     |
| S72101  | 82031  | 1     |
| S72190  | 82020  | 1     |
| S72191  | 82030  | 1     |
| S72200  | 82022  | 1     |
| S72201  | 82032  | 1     |
| S72300  | 82101  | 1     |
| S72301  | 82111  | 1     |
| S72400  | 82122  | 1     |
| S72410  | 82121  | 1     |
| S72411  | 82131  | 1     |
| S72420  | 82123  | 1     |
| S72421  | 82133  | 1     |
| S72490  | 82120  | 1     |
| S72491  | 82130  | 1     |
| S72700  | 82100  | 2     |
| S72701  | 82110  | 2     |
| S72800  | 82100  | 1     |



| ICD10CA | ICD9CM | GRADE |
|---------|--------|-------|
| S72801  | 82110  | 1     |
| S72900  | 82100  | 1     |
| S72901  | 82110  | 1     |
| S73000  | 83501  | 1     |
| S73080  | 83503  | 1     |
| S73090  | 83500  | 1     |
| S7311   | 8431   | 0     |
| S7318   | 8438   | 1     |
| S7319   | 8439   | 1     |
| S7408   | 9560   | 1     |
| S7418   | 9561   | 1     |
| S7488   | 9565   | 1     |
| S750    | 9040   | 2     |
| S757    | 9047   | 1     |
| S758    | 9047   | 1     |
| S759    | 9048   | 1     |
| S7600   | 8902   | 2     |
| S7608   | 9596   | 1     |
| S7610   | 8902   | 2     |
| S7618   | 9596   | 1     |
| S7620   | 8902   | 2     |
| S7628   | 9596   | 1     |
| S7630   | 8902   | 2     |
| S7638   | 9596   | 1     |
| S7640   | 8902   | 2     |
| S7648   | 9596   | 1     |
| S7670   | 8902   | 2     |
| S7678   | 9596   | 1     |
| S770    | 92801  | 0     |
| S797    | 9596   | 1     |
| S798    | 9596   | 1     |
| S799    | 9596   | 1     |
| S800    | 92410  | 2     |
| S801    | 92410  | 2     |
| S807    | 9168   | 2     |
| S808    | 9168   | 2     |
| S809    | 9168   | 2     |
| S8100   | 8910   | 1     |
| S8101   | 8911   | 1     |
| S8170   | 8910   | 1     |
| S8171   | 8911   | 1     |
| S8180   | 8910   | 1     |
| S8181   | 8911   | 1     |

| ICD10CA | ICD9CM | GRADE |
|---------|--------|-------|
| S8190   | 8910   | 1     |
| S8191   | 8911   | 1     |
| S82000  | 8220   | 1     |
| S82001  | 8221   | 1     |
| S82100  | 82300  | 1     |
| S82101  | 82310  | 1     |
| S82200  | 82320  | 1     |
| S82201  | 82330  | 1     |
| S82300  | 8248   | 1     |
| S82301  | 8249   | 1     |
| S82400  | 82381  | 1     |
| S82401  | 82391  | 1     |
| S82500  | 8240   | 1     |
| S82501  | 8241   | 1     |
| S82600  | 8242   | 1     |
| S82601  | 8243   | 1     |
| S82700  | 8270   | 1     |
| S82800  | 8244   | 1     |
| S82801  | 8245   | 1     |
| S82810  | 8246   | 1     |
| S82811  | 8247   | 1     |
| S82820  | 8240   | 1     |
| S82821  | 8249   | 0     |
| S82890  | 8248   | 1     |
| S82891  | 8249   | 1     |
| S82900  | 82300  | 1     |
| S82901  | 82310  | 1     |
| S83000  | 8363   | 1     |
| S83100  | 83651  | 1     |
| S83190  | 83650  | 1     |
| S8320   | 8360   | 1     |
| S8321   | 8361   | 1     |
| S8329   | 8362   | 0     |
| S833    | 8362   | 0     |
| S83400  | 8440   | 1     |
| S83410  | 8441   | 1     |
| S83411  | 8441   | 1     |
| S83500  | 8442   | 1     |
| S83501  | 8442   | 1     |
| S83580  | 8442   | 1     |
| S83590  | 8442   | 0     |
| S836    | 8448   | 2     |
| S8408   | 9562   | 1     |

| ICD10CA | ICD9CM | GRADE |
|---------|--------|-------|
| S8418   | 9563   | 1     |
| S8428   | 9564   | 0     |
| S8498   | 9569   | 0     |
| S851    | 90452  | 2     |
| S853    | 9043   | 1     |
| S8608   | 84509  | 1     |
| S8610   | 8912   | 2     |
| S8678   | 9597   | 1     |
| S8680   | 8912   | 2     |
| S8688   | 9597   | 1     |
| S8698   | 8942   | 0     |
| S878    | 92810  | 1     |
| S897    | 9597   | 1     |
| S898    | 9597   | 1     |
| S899    | 9597   | 1     |
| S900    | 92420  | 2     |
| S903    | 92420  | 2     |
| S907    | 9198   | 2     |
| S908    | 9168   | 2     |
| S909    | 9168   | 2     |
| S9100   | 8910   | 1     |
| S9110   | 8930   | 0     |
| S9111   | 8931   | 1     |
| S9120   | 8930   | 1     |
| S9130   | 8920   | 1     |
| S9131   | 8921   | 1     |
| S9172   | 8940   | 1     |
| S92000  | 8250   | 1     |
| S92001  | 8251   | 1     |
| S92100  | 82521  | 1     |
| S92101  | 82531  | 1     |
| S92200  | 82522  | 1     |
| S92210  | 82523  | 1     |
| S92220  | 82524  | 1     |
| S92290  | 82520  | 1     |
| S92300  | 82525  | 1     |
| S92301  | 82535  | 1     |
| S92400  | 8260   | 1     |
| S92500  | 8260   | 1     |
| S92700  | 8270   | 2     |
| S92900  | 82520  | 0     |
| S93000  | 8370   | 1     |
| S93001  | 8371   | 1     |

| ICD10CA | ICD9CM | GRADE |
|---------|--------|-------|
| S93100  | 83805  | 0     |
| S93300  | 83802  | 1     |
| S93310  | 83806  | 0     |
| S9348   | 84509  | 1     |
| S9349   | 84500  | 1     |
| S936    | 84510  | 2     |
| S9428   | 9563   | 1     |
| S9498   | 9569   | 1     |
| S9680   | 8932   | 2     |
| S9690   | 8932   | 2     |
| S971    | 9283   | 1     |
| S981    | 8950   | 2     |
| S998    | 9597   | 1     |
| S999    | 9597   | 1     |
| T000    | 9108   | 2     |
| T002    | 9198   | 2     |
| T003    | 9198   | 2     |
| T006    | 9198   | 2     |
| T008    | 9198   | 2     |
| T009    | 9248   | 1     |
| T0120   | 8840   | 1     |
| T0130   | 8940   | 1     |
| T0160   | 8840   | 3     |
| T0180   | 8798   | 1     |
| T0190   | 8798   | 1     |
| T0220   | 8180   | 1     |
| T0230   | 8270   | 1     |
| T0240   | 8190   | 1     |
| T0250   | 8280   | 1     |
| T0251   | 8281   | 1     |
| T0260   | 8280   | 1     |
| T0270   | 8280   | 1     |
| T0280   | 8280   | 1     |
| T0281   | 8281   | 1     |
| T0290   | 8280   | 1     |
| T041    | 9268   | 0     |
| T043    | 9288   | 1     |
| T047    | 9290   | 1     |
| T062    | 9578   | 1     |
| T063    | 9049   | 2     |
| T068    | 9598   | 1     |
| T07     | 9598   | 1     |
| T080    | 8058   | 1     |

| ICD10CA | ICD9CM | GRADE |
|---------|--------|-------|
| T090    | 9118   | 2     |
| T098    | 9591   | 1     |
| T099    | 9591   | 0     |
| T100    | 8180   | 0     |
| T110    | 9198   | 2     |
| T111    | 8840   | 2     |
| T119    | 9599   | 2     |
| T130    | 9168   | 2     |
| T131    | 8940   | 1     |
| T132    | 8398   | 2     |
| T133    | 9569   | 1     |
| T138    | 9597   | 1     |
| T140    | 9198   | 1     |
| T141    | 8798   | 1     |
| T143    | 8398   | 0     |
| T144    | 9579   | 1     |
| T146    | 8489   | 1     |
| T149    | 9599   | 1     |
| T16     | 931    | 0     |
| T172    | 9330   | 1     |
| T173    | 9331   | 1     |
| T174    | 9340   | 1     |
| T175    | 9341   | 1     |
| T178    | 9348   | 1     |
| T179    | 9349   | 1     |
| T181    | 9351   | 1     |
| T182    | 9352   | 1     |
| T183    | 936    | 1     |
| T184    | 936    | 1     |
| T188    | 938    | 1     |
| T189    | 938    | 1     |
| T190    | 9390   | 1     |
| T191    | 9390   | 1     |
| T202    | 94120  | 0     |
| T203    | 94130  | 0     |
| T210    | 94202  | 2     |
| T212    | 94224  | 2     |
| T213    | 94230  | 0     |
| T222    | 94324  | 2     |
| T223    | 94335  | 0     |
| T232    | 94428  | 2     |
| T233    | 94438  | 0     |
| T240    | 94509  | 2     |

| ICD10CA | ICD9CM | GRADE |
|---------|--------|-------|
| T242    | 94529  | 2     |
| T246    | 94529  | 2     |
| T250    | 94502  | 2     |
| T252    | 94522  | 2     |
| T280    | 9470   | 0     |
| T290    | 9460   | 0     |
| T302    | 9492   | 1     |
| T303    | 9493   | 0     |
| T3100   | 94800  | 1     |
| T3101   | 94800  | 0     |
| T3110   | 94810  | 1     |
| T3134   | 94833  | 0     |
| T3200   | 94800  | 1     |
| T335    | 9991   | 0     |
| T345    | 9911   | 2     |
| T348    | 9912   | 2     |
| T350    | 9913   | 1     |
| T354    | 9911   | 1     |
| T355    | 9912   | 1     |
| T360    | 9600   | 0     |
| T368    | 9608   | 1     |
| T380    | 9620   | 1     |
| T381    | 9627   | 1     |
| T383    | 9623   | 1     |
| T386    | 9629   | 1     |
| T390    | 9651   | 1     |
| T391    | 9654   | 1     |
| T393    | 96561  | 1     |
| T398    | 9657   | 2     |
| T402    | 96509  | 2     |
| T404    | 96509  | 2     |
| T406    | 9658   | 1     |
| T412    | 9684   | 1     |
| T413    | 9689   | 1     |
| T420    | 9661   | 1     |
| T421    | 9663   | 1     |
| T424    | 9694   | 1     |
| T426    | 9663   | 2     |
| T427    | 9679   | 2     |
| T428    | 9664   | 1     |
| T430    | 9690   | 1     |
| T432    | 9690   | 1     |
| T434    | 9692   | 1     |

| ICD10CA | ICD9CM | GRADE |
|---------|--------|-------|
| T435    | 9693   | 1     |
| T438    | 9698   | 1     |
| T447    | 9720   | 2     |
| T450    | 9630   | 1     |
| T451    | 9631   | 1     |
| T455    | 9642   | 1     |
| T457    | 9643   | 1     |
| T460    | 9721   | 1     |
| T461    | 9729   | 0     |
| T462    | 9720   | 1     |
| T464    | 9729   | 2     |
| T465    | 9726   | 1     |
| T480    | 9750   | 1     |
| T486    | 9757   | 1     |
| T500    | 9620   | 1     |
| T501    | 9744   | 1     |
| T502    | 9742   | 2     |
| T503    | 9745   | 1     |
| T507    | 9700   | 1     |
| T509    | 9779   | 2     |
| T510    | 9800   | 1     |
| T658    | 98989  | 1     |
| T66     | 990    | 1     |
| T670    | 9920   | 1     |
| T68     | 9916   | 1     |
| T71     | 9947   | 1     |
| T730    | 9942   | 1     |
| T740    | 99552  | 2     |
| T741    | 99554  | 2     |
| T742    | 99583  | 2     |
| T743    | 99582  | 0     |
| T748    | 99559  | 1     |
| T749    | 99550  | 1     |
| T754    | 9948   | 1     |
| T782    | 9950   | 1     |
| T783    | 9951   | 1     |
| T784    | 9953   | 1     |
| T788    | 99589  | 1     |
| T789    | 9952   | 1     |
| T790    | 9580   | 1     |
| T791    | 9581   | 1     |
| T792    | 9582   | 1     |
| T793    | 9583   | 1     |

| ICD10CA | ICD9CM | GRADE |
|---------|--------|-------|
| T794    | 9584   | 1     |
| T795    | 9585   | 1     |
| T796    | 9586   | 2     |
| T797    | 9587   | 1     |
| T798    | 9588   | 1     |
| T801    | 9992   | 1     |
| T802    | 9993   | 1     |
| T803    | 9996   | 1     |
| T805    | 9994   | 1     |
| T806    | 9995   | 1     |
| T808    | 9998   | 1     |
| T809    | 9998   | 2     |
| T810    | 99811  | 1     |
| T811    | 9980   | 1     |
| T812    | 9982   | 1     |
| T813    | 9983   | 1     |
| T814    | 99859  | 1     |
| T8152   | 9984   | 0     |
| T8157   | 9984   | 0     |
| T8158   | 9984   | 1     |
| T8159   | 9984   | 1     |
| T817    | 9972   | 2     |
| T8180   | 9999   | 1     |
| T8181   | 99881  | 1     |
| T8182   | 9986   | 1     |
| T8188   | 99889  | 1     |
| T819    | 9989   | 1     |
| T820    | 99602  | 1     |
| T821    | 99601  | 2     |
| T822    | 99603  | 2     |
| T823    | 9961   | 1     |
| T824    | 9961   | 1     |
| T825    | 99609  | 1     |
| T826    | 99661  | 1     |
| T827    | 99661  | 2     |
| T828    | 99672  | 2     |
| T829    | 99674  | 2     |
| T830    | 99631  | 2     |
| T831    | 99630  | 2     |
| T834    | 99630  | 2     |
| T835    | 99665  | 1     |
| T836    | 99665  | 1     |
| T838    | 99676  | 1     |



| ICD10CA | ICD9CM | GRADE |
|---------|--------|-------|
| T839    | 99676  | 1     |
| T8400   | 9964   | 1     |
| T8401   | 9964   | 1     |
| T8402   | 9964   | 1     |
| T8403   | 9964   | 1     |
| T8404   | 9964   | 1     |
| T8405   | 9964   | 1     |
| T8408   | 9964   | 1     |
| T8410   | 9964   | 1     |
| T8411   | 9964   | 1     |
| T8412   | 9964   | 1     |
| T8413   | 9964   | 1     |
| T8414   | 9964   | 1     |
| T8415   | 9964   | 1     |
| T8419   | 9964   | 1     |
| T8420   | 9964   | 1     |
| T8422   | 9964   | 1     |
| T8423   | 9964   | 1     |
| T8424   | 9964   | 1     |
| T8428   | 9964   | 1     |
| T843    | 9964   | 1     |
| T844    | 9964   | 1     |
| T8453   | 99666  | 1     |
| T8454   | 99666  | 1     |
| T8455   | 99666  | 1     |
| T8459   | 99666  | 1     |
| T8460   | 99667  | 1     |
| T8461   | 99667  | 1     |
| T8463   | 99667  | 1     |
| T8464   | 99667  | 1     |
| T8468   | 99667  | 1     |
| T847    | 99667  | 1     |
| T848    | 99678  | 1     |
| T849    | 99677  | 1     |
| T850    | 9962   | 1     |
| T852    | 99653  | 1     |
| T853    | 99653  | 2     |
| T855    | 99659  | 1     |
| T856    | 99659  | 1     |
| T857    | 99669  | 1     |
| T858    | 99679  | 2     |
| T859    | 99679  | 1     |
| T86101  | 99681  | 1     |

| ICD10CA | ICD9CM | GRADE |
|---------|--------|-------|
| T86200  | 99683  | 1     |
| T86841  | 99652  | 2     |
| T86881  | 99652  | 2     |
| T8742   | 99762  | 1     |
| T8746   | 99762  | 0     |
| T8747   | 99762  | 1     |
| T8748   | 99762  | 1     |
| T8752   | 99769  | 0     |
| T8756   | 99769  | 1     |
| T8757   | 99769  | 1     |
| T8758   | 99769  | 1     |
| T8762   | 99760  | 1     |
| T8767   | 99760  | 1     |
| T8768   | 99760  | 1     |
| T880    | 9993   | 1     |
| T882    | 9954   | 1     |
| T883    | 99589  | 1     |
| T884    | 99889  | 1     |
| T885    | 99589  | 1     |
| T886    | 9950   | 1     |
| T887    | 9952   | 1     |
| T888    | 9999   | 1     |
| T889    | 9989   | 2     |
| T902    | 9050   | 1     |
| T904    | 9060   | 1     |
| T905    | 9070   | 1     |
| T908    | 9083   | 2     |
| T909    | 9070   | 2     |
| T910    | 9060   | 2     |
| T911    | 9051   | 1     |
| T912    | 9051   | 1     |
| T913    | 9072   | 1     |
| T918    | 9073   | 2     |
| T921    | 9052   | 1     |
| T922    | 9052   | 1     |
| T928    | 9083   | 2     |
| T931    | 9053   | 1     |
| T932    | 9054   | 1     |
| T933    | 9056   | 2     |
| T934    | 9075   | 1     |
| T935    | 9058   | 2     |
| T939    | 9089   | 1     |
| T941    | 9089   | 1     |

| ICD10CA | ICD9CM | GRADE |
|---------|--------|-------|
| T951    | 9068   | 0     |
| T958    | 9068   | 1     |
| T970    | 9091   | 1     |
| T981    | 9099   | 1     |
| T983    | 9093   | 1     |
| U0490   | 51882  | 0     |
| U0491   | 07989  | 2     |
| U800    | V090   | 0     |
| U801    | V090   | 0     |
| U808    | V090   | 0     |
| U810    | V0980  | 0     |
| U818    | V0980  | 0     |
| U820    | V0980  | 3     |
| U821    | V0980  | 3     |
| U822    | V0980  | 3     |
| U823    | V0980  | 3     |
| U828    | V0980  | 0     |
| U830    | V0980  | 3     |
| U831    | V0980  | 3     |
| U832    | V0980  | 3     |
| U837    | V0980  | 3     |
| U838    | V0980  | 3     |
| U839    | V0980  | 3     |
| U847    | V0980  | 3     |
| U848    | V0980  | 3     |
| U85     | V0980  | 3     |
| U88     | V0991  | 0     |
| U898    | V0980  | 0     |
| U899    | V0990  | 0     |
| U980    | E8490  | 1     |
| U981    | E8497  | 1     |
| U982    | E8496  | 1     |
| U983    | E8494  | 1     |
| U984    | E8495  | 1     |
| U985    | E8496  | 1     |
| U986    | E8493  | 1     |
| U987    | E8491  | 1     |
| U988    | E8498  | 1     |
| U989    | E8499  | 1     |
| V010    | E8260  | 1     |
| V011    | E8260  | 1     |
| V019    | E8260  | 1     |
| V020    | E8227  | 1     |

| ICD10CA | ICD9CM | GRADE |
|---------|--------|-------|
| V021    | E8147  | 1     |
| V029    | E8147  | 1     |
| V030    | E8227  | 1     |
| V031    | E8147  | 1     |
| V039    | E8147  | 1     |
| V040    | E8227  | 1     |
| V041    | E8147  | 1     |
| V049    | E8147  | 1     |
| V060    | E8290  | 1     |
| V090    | E8257  | 1     |
| V091    | E8257  | 1     |
| V092    | E8147  | 1     |
| V093    | E8147  | 1     |
| V099    | E8147  | 1     |
| V100    | E8261  | 1     |
| V104    | E8261  | 1     |
| V112    | E8261  | 1     |
| V114    | E8261  | 1     |
| V130    | E8226  | 1     |
| V134    | E8136  | 1     |
| V139    | E8136  | 1     |
| V144    | E8136  | 1     |
| V164    | E8261  | 1     |
| V170    | E8261  | 1     |
| V174    | E8261  | 1     |
| V180    | E8261  | 1     |
| V181    | E8261  | 1     |
| V182    | E8261  | 1     |
| V183    | E8261  | 1     |
| V184    | E8261  | 1     |
| V189    | E8261  | 1     |
| V192    | E8226  | 1     |
| V193    | E8261  | 1     |
| V198    | E8261  | 1     |
| V199    | E8261  | 1     |
| V200    | E8222  | 1     |
| V220    | E8222  | 1     |
| V233    | E8122  | 1     |
| V234    | E8122  | 1     |
| V239    | E8122  | 1     |
| V244    | E8122  | 1     |
| V254    | E8102  | 1     |
| V260    | E8222  | 1     |

| ICD10CA | ICD9CM | GRADE |
|---------|--------|-------|
| V270    | E8232  | 1     |
| V274    | E8152  | 1     |
| V280    | E8252  | 1     |
| V283    | E8179  | 1     |
| V284    | E8182  | 1     |
| V285    | E8183  | 1     |
| V289    | E8189  | 1     |
| V292    | E8229  | 1     |
| V293    | E8259  | 1     |
| V298    | E8122  | 1     |
| V299    | E8192  | 1     |
| V300    | E8220  | 1     |
| V304    | E8148  | 1     |
| V320    | E8220  | 1     |
| V330    | E8220  | 1     |
| V345    | E8129  | 1     |
| V360    | E8220  | 1     |
| V370    | E8230  | 1     |
| V380    | E8250  | 1     |
| V382    | E8258  | 1     |
| V384    | E8179  | 1     |
| V385    | E8180  | 1     |
| V398    | E8128  | 1     |
| V402    | E8228  | 1     |
| V404    | E8148  | 1     |
| V405    | E8140  | 1     |
| V407    | E8148  | 1     |
| V430    | E8220  | 1     |
| V432    | E8228  | 1     |
| V434    | E8128  | 1     |
| V435    | E8120  | 1     |
| V436    | E8121  | 1     |
| V437    | E8128  | 1     |
| V439    | E8129  | 1     |
| V445    | E8120  | 1     |
| V446    | E8121  | 1     |
| V464    | E8138  | 1     |
| V470    | E8230  | 1     |
| V474    | E8158  | 1     |
| V475    | E8150  | 1     |
| V476    | E8151  | 1     |
| V479    | E8159  | 1     |
| V480    | E8250  | 1     |

| ICD10CA | ICD9CM | GRADE |
|---------|--------|-------|
| V481    | E8251  | 1     |
| V482    | E8258  | 1     |
| V483    | E8259  | 1     |
| V484    | E8178  | 1     |
| V485    | E8160  | 1     |
| V486    | E8161  | 1     |
| V487    | E8168  | 1     |
| V492    | E8229  | 1     |
| V493    | E8229  | 1     |
| V494    | E8120  | 1     |
| V495    | E8120  | 1     |
| V496    | E8129  | 1     |
| V498    | E8128  | 1     |
| V499    | E8199  | 1     |
| V504    | E8148  | 1     |
| V534    | E8128  | 1     |
| V535    | E8120  | 1     |
| V536    | E8121  | 1     |
| V545    | E8120  | 1     |
| V580    | E8250  | 1     |
| V581    | E8251  | 1     |
| V582    | E8258  | 1     |
| V583    | E8259  | 1     |
| V584    | E8179  | 1     |
| V586    | E8161  | 1     |
| V587    | E8168  | 1     |
| V590    | E8220  | 1     |
| V593    | E8259  | 1     |
| V598    | E8128  | 1     |
| V599    | E8199  | 1     |
| V600    | E8220  | 1     |
| V635    | E8120  | 1     |
| V644    | E8128  | 1     |
| V654    | E8108  | 1     |
| V675    | E8150  | 1     |
| V682    | E8258  | 1     |
| V684    | E8178  | 1     |
| V686    | E8161  | 1     |
| V704    | E8148  | 1     |
| V736    | E8121  | 1     |
| V746    | E8121  | 1     |
| V774    | E8158  | 1     |
| V781    | E8251  | 1     |

| ICD10CA | ICD9CM | GRADE |
|---------|--------|-------|
| V782    | E8258  | 1     |
| V784    | E8178  | 1     |
| V786    | E8161  | 1     |
| V792    | E8229  | 1     |
| V793    | E8259  | 1     |
| V794    | E8120  | 1     |
| V795    | E8121  | 1     |
| V798    | E8198  | 1     |
| V799    | E8199  | 1     |
| V800    | E8272  | 1     |
| V809    | E8272  | 1     |
| V814    | E8048  | 1     |
| V815    | E8048  | 1     |
| V816    | E8048  | 1     |
| V819    | E8078  | 1     |
| V824    | E8294  | 1     |
| V825    | E8294  | 1     |
| V829    | E8294  | 1     |
| V834    | E846   | 1     |
| V835    | E846   | 1     |
| V837    | E846   | 1     |
| V840    | E8190  | 1     |
| V844    | E9190  | 1     |
| V845    | E9190  | 1     |
| V846    | E9190  | 1     |
| V847    | E9190  | 1     |
| V849    | E9190  | 1     |
| V857    | E8218  | 1     |
| V8600   | E8190  | 1     |
| V8608   | E8190  | 1     |
| V864    | E8219  | 1     |
| V8650   | E8210  | 1     |
| V8658   | E8210  | 1     |
| V8660   | E8211  | 1     |
| V8668   | E8211  | 1     |
| V867    | E8218  | 1     |
| V8690   | E8219  | 1     |
| V8698   | E8219  | 1     |
| V878    | E8189  | 1     |
| V879    | E8299  | 1     |
| V882    | E8229  | 1     |
| V888    | E8259  | 1     |
| V890    | E8259  | 1     |

| ICD10CA | ICD9CM | GRADE |
|---------|--------|-------|
| V892    | E8199  | 1     |
| V893    | E8299  | 1     |
| V899    | E848   | 1     |
| V902    | E8309  | 1     |
| V911    | E8319  | 1     |
| V923    | E8329  | 1     |
| V929    | E8329  | 1     |
| V930    | E8389  | 1     |
| V931    | E8389  | 1     |
| V932    | E8389  | 1     |
| V933    | E8389  | 1     |
| V934    | E8389  | 1     |
| V939    | E8389  | 1     |
| V941    | E8389  | 1     |
| V942    | E8389  | 1     |
| V943    | E8389  | 1     |
| V944    | E8389  | 1     |
| V946    | E8389  | 1     |
| V949    | E8389  | 1     |
| V951    | E8419  | 1     |
| V952    | E8415  | 1     |
| V971    | E8439  | 1     |
| V98     | E848   | 1     |
| W00     | E888   | 1     |
| W01     | E885   | 1     |
| W0200   | E888   | 2     |
| W0201   | E888   | 2     |
| W0202   | E888   | 2     |
| W0203   | E888   | 2     |
| W0204   | E888   | 2     |
| W0208   | E888   | 2     |
| W03     | E8869  | 1     |
| W04     | E888   | 1     |
| W0500   | E8843  | 1     |
| W0501   | E888   | 2     |
| W0502   | E888   | 2     |
| W0504   | E888   | 3     |
| W0508   | E888   | 2     |
| W0509   | E888   | 2     |
| W06     | E8844  | 1     |
| W07     | E8842  | 1     |
| W08     | E8845  | 1     |
| W0901   | E8840  | 3     |



| ICD10CA | ICD9CM | GRADE |
|---------|--------|-------|
| W10     | E8809  | 1     |
| W11     | E8810  | 1     |
| W12     | E8811  | 1     |
| W13     | E882   | 1     |
| W14     | E8849  | 1     |
| W15     | E8841  | 1     |
| W16     | E8830  | 1     |
| W17     | E8849  | 1     |
| W18     | E888   | 1     |
| W19     | E888   | 1     |
| W20     | E916   | 1     |
| W2100   | E9170  | 1     |
| W2108   | E9170  | 1     |
| W2109   | E9170  | 1     |
| W2200   | E9170  | 1     |
| W2201   | E9170  | 1     |
| W2202   | E9170  | 1     |
| W2203   | E9170  | 1     |
| W2205   | E9170  | 1     |
| W2207   | E9170  | 1     |
| W2208   | E9179  | 1     |
| W2209   | E9179  | 1     |
| W23     | E918   | 1     |
| W24     | E9192  | 1     |
| W25     | E9208  | 1     |
| W28     | E9200  | 1     |
| W30     | E9190  | 1     |
| W31     | E9199  | 1     |
| W3408   | E9228  | 1     |
| W44     | E915   | 1     |
| W45     | E9208  | 1     |
| W46     | E9205  | 1     |
| W49     | E9288  | 1     |
| W50     | E9179  | 1     |
| W5100   | E9170  | 1     |
| W5102   | E9170  | 1     |
| W5105   | E9170  | 1     |
| W5107   | E9170  | 1     |
| W5108   | E9179  | 1     |
| W5109   | E9179  | 1     |
| W52     | E9171  | 1     |
| W54     | E9060  | 1     |
| W55     | E9065  | 1     |

| <b>ICD10CA</b> | <b>ICD9CM</b> | <b>GRADE</b> |
|----------------|---------------|--------------|
| W57            | E9064         | 1            |
| W59            | E9062         | 1            |
| W60            | E9208         | 1            |
| W64            | E9068         | 2            |
| W70            | E9108         | 1            |
| W74            | E9109         | 1            |
| W75            | E9130         | 1            |
| W77            | E9133         | 1            |
| W78            | E911          | 1            |
| W79            | E911          | 1            |
| W80            | E912          | 1            |
| W84            | E9139         | 1            |
| W86            | E9258         | 1            |
| W87            | E9259         | 1            |
| W89            | E9262         | 1            |
| W91            | E9269         | 1            |
| X09            | E899          | 1            |
| X10            | E9240         | 1            |
| X11            | E9242         | 1            |
| X12            | E9240         | 1            |
| X1505          | E9248         | 3            |
| X16            | E9248         | 1            |
| X18            | E9240         | 1            |
| X19            | E9249         | 1            |
| X30            | E9000         | 1            |
| X31            | E9010         | 1            |
| X36            | E9098         | 1            |
| X3701          | E9080         | 1            |
| X3708          | E9089         | 1            |
| X3709          | E9089         | 1            |
| X39            | E9288         | 1            |
| X40            | E8509         | 2            |
| X41            | E8550         | 2            |
| X42            | E8508         | 2            |
| X43            | E8554         | 2            |
| X44            | E8589         | 2            |
| X46            | E8624         | 2            |
| X49            | E8668         | 2            |
| X50            | E927          | 1            |
| X51            | E903          | 1            |
| X53            | E9041         | 1            |
| X54            | E9042         | 1            |
| X57            | E9049         | 1            |

| <b>ICD10CA</b> | <b>ICD9CM</b> | <b>GRADE</b> |
|----------------|---------------|--------------|
| X58            | E9288         | 1            |
| X590           | E887          | 1            |
| X599           | E9289         | 1            |
| X61            | E9504         | 2            |
| X62            | E9504         | 1            |
| X64            | E9504         | 1            |
| X65            | E9509         | 1            |
| X78            | E956          | 1            |
| X79            | E9588         | 1            |
| X80            | E9579         | 1            |
| X83            | E9588         | 1            |
| Y00            | E9682         | 1            |
| Y01            | E9681         | 1            |
| Y02            | E9688         | 1            |
| Y03            | E9688         | 1            |
| Y04            | E9600         | 1            |
| Y060           | E9684         | 1            |
| Y068           | E9684         | 1            |
| Y070           | E9673         | 1            |
| Y073           | E9671         | 1            |
| Y078           | E9671         | 1            |
| Y079           | E9679         | 1            |
| Y08            | E9688         | 1            |
| Y09            | E9689         | 1            |
| Y11            | E9804         | 2            |
| Y12            | E9804         | 1            |
| Y14            | E9805         | 1            |
| Y15            | E9809         | 1            |
| Y18            | E9807         | 1            |
| Y19            | E9809         | 1            |
| Y30            | E9879         | 1            |
| Y31            | E9880         | 1            |
| Y33            | E9888         | 1            |
| Y34            | E9889         | 1            |
| Y400           | E9300         | 1            |
| Y401           | E9305         | 1            |
| Y403           | E9303         | 1            |
| Y405           | E9306         | 1            |
| Y406           | E9306         | 1            |
| Y407           | E9301         | 1            |
| Y408           | E9308         | 1            |
| Y409           | E9309         | 1            |
| Y410           | E9310         | 1            |

| ICD10CA | ICD9CM | GRADE |
|---------|--------|-------|
| Y411    | E9306  | 1     |
| Y412    | E9314  | 1     |
| Y415    | E9317  | 1     |
| Y418    | E9319  | 1     |
| Y419    | E9319  | 1     |
| Y420    | E9320  | 1     |
| Y421    | E9327  | 1     |
| Y422    | E9328  | 1     |
| Y423    | E9323  | 1     |
| Y424    | E9322  | 1     |
| Y427    | E9321  | 1     |
| Y428    | E9329  | 1     |
| Y430    | E9330  | 1     |
| Y431    | E9331  | 1     |
| Y433    | E9307  | 1     |
| Y434    | E9331  | 1     |
| Y435    | E9332  | 2     |
| Y436    | E9334  | 1     |
| Y440    | E9340  | 1     |
| Y441    | E9341  | 2     |
| Y442    | E9342  | 1     |
| Y443    | E9345  | 2     |
| Y444    | E9342  | 1     |
| Y445    | E9344  | 1     |
| Y446    | E9347  | 1     |
| Y449    | E9348  | 1     |
| Y450    | E9352  | 1     |
| Y451    | E9353  | 1     |
| Y452    | E9356  | 1     |
| Y453    | E9358  | 1     |
| Y455    | E9352  | 2     |
| Y458    | E9358  | 1     |
| Y459    | E9359  | 1     |
| Y462    | E9361  | 1     |
| Y464    | E9363  | 1     |
| Y465    | E9363  | 1     |
| Y466    | E9363  | 1     |
| Y467    | E9364  | 1     |
| Y468    | E9380  | 1     |
| Y470    | E9370  | 1     |
| Y471    | E9394  | 1     |
| Y472    | E9371  | 1     |
| Y473    | E9372  | 1     |

| <b>ICD10CA</b> | <b>ICD9CM</b> | <b>GRADE</b> |
|----------------|---------------|--------------|
| Y475           | E9376         | 1            |
| Y478           | E9378         | 1            |
| Y479           | E9379         | 1            |
| Y480           | E9382         | 1            |
| Y481           | E9383         | 1            |
| Y482           | E9384         | 1            |
| Y483           | E9389         | 1            |
| Y484           | E9389         | 1            |
| Y485           | E9458         | 1            |
| Y490           | E9390         | 1            |
| Y491           | E9390         | 1            |
| Y492           | E9390         | 1            |
| Y493           | E9391         | 1            |
| Y494           | E9392         | 1            |
| Y495           | E9393         | 1            |
| Y498           | E9398         | 1            |
| Y499           | E9399         | 1            |
| Y500           | E9400         | 1            |
| Y501           | E9401         | 1            |
| Y510           | E9410         | 1            |
| Y512           | E9423         | 1            |
| Y513           | E9411         | 1            |
| Y514           | E9428         | 1            |
| Y516           | E9413         | 1            |
| Y517           | E9413         | 1            |
| Y518           | E9413         | 1            |
| Y519           | E9419         | 1            |
| Y520           | E9421         | 1            |
| Y521           | E9426         | 1            |
| Y522           | E9420         | 1            |
| Y523           | E9424         | 1            |
| Y524           | E9426         | 1            |
| Y525           | E9426         | 1            |
| Y526           | E9422         | 1            |
| Y529           | E9429         | 1            |
| Y530           | E9430         | 1            |
| Y531           | E9430         | 1            |
| Y532           | E9431         | 1            |
| Y533           | E9433         | 1            |
| Y534           | E9433         | 1            |
| Y536           | E9435         | 1            |
| Y539           | E9439         | 1            |
| Y540           | E9320         | 1            |

| ICD10CA | ICD9CM | GRADE |
|---------|--------|-------|
| Y541    | E9444  | 1     |
| Y542    | E9442  | 1     |
| Y543    | E9443  | 1     |
| Y544    | E9444  | 1     |
| Y545    | E9444  | 1     |
| Y546    | E9445  | 1     |
| Y547    | E9326  | 1     |
| Y548    | E9447  | 1     |
| Y549    | E9446  | 1     |
| Y551    | E9452  | 1     |
| Y556    | E9457  | 1     |
| Y560    | E9460  | 1     |
| Y561    | E9461  | 1     |
| Y563    | E9463  | 1     |
| Y568    | E9468  | 1     |
| Y571    | E9471  | 1     |
| Y572    | E9472  | 1     |
| Y575    | E9478  | 1     |
| Y577    | E9335  | 1     |
| Y578    | E9478  | 1     |
| Y579    | E9479  | 1     |
| Y600    | E8700  | 1     |
| Y604    | E8704  | 1     |
| Y606    | E8705  | 1     |
| Y607    | E8707  | 1     |
| Y608    | E8708  | 1     |
| Y609    | E8709  | 1     |
| Y610    | E8710  | 1     |
| Y616    | E8715  | 1     |
| Y620    | E8720  | 1     |
| Y628    | E8728  | 1     |
| Y630    | E8730  | 1     |
| Y631    | E8731  | 1     |
| Y635    | E8735  | 1     |
| Y636    | E8736  | 1     |
| Y638    | E8738  | 1     |
| Y649    | E8759  | 1     |
| Y650    | E8760  | 1     |
| Y654    | E8764  | 1     |
| Y655    | E8765  | 1     |
| Y658    | E8768  | 1     |
| Y69     | E8769  | 1     |
| Y703    | E8788  | 3     |

| ICD10CA | ICD9CM | GRADE |
|---------|--------|-------|
| Y711    | E8789  | 3     |
| Y712    | E8789  | 3     |
| Y718    | E8789  | 3     |
| Y731    | E8799  | 3     |
| Y732    | E8781  | 3     |
| Y733    | E8789  | 3     |
| Y738    | E8799  | 3     |
| Y762    | E8781  | 3     |
| Y780    | E8799  | 1     |
| Y783    | E8799  | 3     |
| Y791    | E8799  | 3     |
| Y792    | E8799  | 3     |
| Y793    | E8799  | 3     |
| Y798    | E8799  | 3     |
| Y800    | E8799  | 3     |
| Y802    | E8799  | 3     |
| Y813    | E8799  | 3     |
| Y821    | E8799  | 3     |
| Y822    | E8799  | 3     |
| Y823    | E8799  | 3     |
| Y828    | E8799  | 1     |
| Y830    | E8780  | 1     |
| Y831    | E8781  | 1     |
| Y832    | E8782  | 1     |
| Y833    | E8783  | 1     |
| Y834    | E8784  | 1     |
| Y835    | E8785  | 1     |
| Y836    | E8786  | 1     |
| Y838    | E8788  | 1     |
| Y839    | E8789  | 1     |
| Y840    | E8790  | 1     |
| Y841    | E8791  | 1     |
| Y842    | E8792  | 1     |
| Y8438   | E8793  | 1     |
| Y844    | E8794  | 1     |
| Y845    | E8795  | 1     |
| Y846    | E8796  | 1     |
| Y847    | E8797  | 1     |
| Y848    | E8798  | 1     |
| Y849    | E8799  | 1     |
| Y850    | E9290  | 1     |
| Y859    | E9291  | 1     |
| Y86     | E9298  | 1     |

| ICD10CA | ICD9CM | GRADE |
|---------|--------|-------|
| Y872    | E989   | 1     |
| Y880    | E9479  | 1     |
| Y882    | E8799  | 1     |
| Y883    | E8799  | 1     |
| Y899    | E9299  | 1     |
| Y900    | E9809  | 3     |
| Y901    | E9809  | 3     |
| Y902    | E9809  | 3     |
| Y907    | E9809  | 3     |
| Y909    | E9809  | 3     |
| Y919    | E9809  | 1     |
| Y95     | 1369   | 3     |
| Z005    | V708   | 1     |
| Z006    | V707   | 1     |
| Z008    | V706   | 1     |
| Z010    | V720   | 1     |
| Z016    | V725   | 1     |
| Z018    | V7285  | 1     |
| Z022    | V703   | 1     |
| Z029    | V703   | 1     |
| Z031    | V711   | 1     |
| Z032    | V7109  | 2     |
| Z033    | V718   | 1     |
| Z034    | V717   | 1     |
| Z035    | V717   | 1     |
| Z036    | V718   | 1     |
| Z038    | V718   | 1     |
| Z039    | V719   | 1     |
| Z040    | V704   | 1     |
| Z043    | V714   | 1     |
| Z0450   | V716   | 1     |
| Z0458   | V716   | 1     |
| Z048    | V718   | 1     |
| Z049    | V719   | 1     |
| Z080    | V670   | 1     |
| Z082    | V672   | 1     |
| Z090    | V670   | 1     |
| Z092    | V672   | 1     |
| Z094    | V674   | 1     |
| Z098    | V6759  | 2     |
| Z111    | V741   | 1     |
| Z114    | V7389  | 2     |
| Z115    | V7389  | 1     |



| ICD10CA | ICD9CM | GRADE |
|---------|--------|-------|
| Z121    | V7649  | 2     |
| Z138    | V779   | 2     |
| Z200    | V010   | 1     |
| Z201    | V011   | 1     |
| Z205    | V017   | 2     |
| Z208    | V018   | 1     |
| Z21     | 79571  | 1     |
| Z221    | V023   | 1     |
| Z22300  | V0259  | 3     |
| Z22301  | V0259  | 3     |
| Z22302  | V0259  | 3     |
| Z22303  | V0259  | 3     |
| Z22304  | V0259  | 3     |
| Z22308  | V0259  | 3     |
| Z22309  | V0259  | 3     |
| Z2238   | V0259  | 1     |
| Z2250   | V0261  | 1     |
| Z2251   | V0262  | 1     |
| Z2258   | V0269  | 1     |
| Z228    | V029   | 1     |
| Z235    | V037   | 1     |
| Z238    | V0389  | 2     |
| Z251    | V048   | 1     |
| Z258    | V058   | 1     |
| Z290    | V070   | 1     |
| Z291    | V072   | 1     |
| Z292    | V0739  | 2     |
| Z298    | V078   | 2     |
| Z305    | V2542  | 1     |
| Z308    | V258   | 1     |
| Z408    | V078   | 1     |
| Z430    | V550   | 1     |
| Z431    | V551   | 1     |
| Z432    | V552   | 1     |
| Z433    | V553   | 1     |
| Z434    | V554   | 1     |
| Z435    | V555   | 1     |
| Z436    | V556   | 1     |
| Z441    | V521   | 1     |
| Z448    | V528   | 1     |
| Z450    | V5331  | 1     |
| Z452    | V539   | 1     |
| Z458    | V539   | 1     |

| ICD10CA | ICD9CM | GRADE |
|---------|--------|-------|
| Z463    | V523   | 1     |
| Z465    | V535   | 2     |
| Z466    | V536   | 1     |
| Z467    | V537   | 1     |
| Z468    | V538   | 1     |
| Z470    | V540   | 1     |
| Z478    | V548   | 1     |
| Z479    | V549   | 1     |
| Z480    | V583   | 1     |
| Z488    | V5849  | 2     |
| Z489    | V5849  | 1     |
| Z490    | V568   | 3     |
| Z491    | V560   | 1     |
| Z492    | V568   | 1     |
| Z500    | V5789  | 2     |
| Z501    | V571   | 1     |
| Z502    | V5789  | 1     |
| Z504    | V5789  | 1     |
| Z505    | V573   | 1     |
| Z507    | V5721  | 2     |
| Z508    | V5789  | 2     |
| Z509    | V579   | 1     |
| Z510    | V580   | 1     |
| Z511    | V581   | 1     |
| Z512    | V581   | 1     |
| Z513    | V582   | 1     |
| Z514    | V5889  | 1     |
| Z515    | V667   | 1     |
| Z51800  | V5889  | 1     |
| Z51808  | V5889  | 1     |
| Z5188   | V5889  | 1     |
| Z522    | V592   | 1     |
| Z525    | V595   | 1     |
| Z528    | V598   | 1     |
| Z529    | V599   | 1     |
| Z530    | V641   | 1     |
| Z531    | V642   | 1     |
| Z532    | V642   | 1     |
| Z538    | V643   | 1     |
| Z539    | V643   | 1     |
| Z540    | V660   | 1     |
| Z541    | V661   | 1     |
| Z543    | V663   | 1     |

| ICD10CA | ICD9CM | GRADE |
|---------|--------|-------|
| Z544    | V664   | 1     |
| Z547    | V666   | 1     |
| Z548    | V665   | 1     |
| Z549    | V669   | 1     |
| Z559    | V623   | 1     |
| Z571    | V153   | 1     |
| Z579    | V1589  | 1     |
| Z585    | V1589  | 3     |
| Z587    | V1582  | 3     |
| Z588    | V1589  | 3     |
| Z590    | V600   | 1     |
| Z591    | V601   | 1     |
| Z592    | V608   | 1     |
| Z593    | V606   | 1     |
| Z596    | V602   | 1     |
| Z598    | V608   | 1     |
| Z599    | V609   | 1     |
| Z602    | V603   | 1     |
| Z603    | V624   | 1     |
| Z604    | V624   | 1     |
| Z608    | V624   | 2     |
| Z609    | V624   | 2     |
| Z630    | V6110  | 1     |
| Z632    | V618   | 1     |
| Z633    | V618   | 2     |
| Z634    | V618   | 2     |
| Z635    | V610   | 1     |
| Z636    | V6149  | 1     |
| Z637    | V6149  | 1     |
| Z638    | V618   | 1     |
| Z639    | V619   | 1     |
| Z652    | V6289  | 2     |
| Z653    | V625   | 1     |
| Z654    | V6289  | 1     |
| Z658    | V6289  | 1     |
| Z659    | V629   | 1     |
| Z710    | V651   | 1     |
| Z711    | V655   | 1     |
| Z713    | V653   | 1     |
| Z714    | V6542  | 2     |
| Z716    | V6542  | 2     |
| Z718    | V6549  | 2     |
| Z719    | V659   | 1     |

| ICD10CA | ICD9CM | GRADE |
|---------|--------|-------|
| Z720    | V698   | 3     |
| Z721    | V698   | 3     |
| Z722    | V698   | 3     |
| Z723    | V690   | 3     |
| Z724    | V691   | 3     |
| Z726    | V693   | 3     |
| Z728    | V698   | 3     |
| Z729    | V699   | 3     |
| Z731    | V6289  | 3     |
| Z733    | V698   | 1     |
| Z735    | V698   | 3     |
| Z736    | V658   | 3     |
| Z738    | V698   | 3     |
| Z739    | V699   | 3     |
| Z740    | V608   | 1     |
| Z741    | V608   | 1     |
| Z742    | V604   | 1     |
| Z743    | V608   | 1     |
| Z748    | V608   | 1     |
| Z749    | V608   | 3     |
| Z750    | V631   | 1     |
| Z751    | V632   | 1     |
| Z752    | V638   | 1     |
| Z753    | V630   | 2     |
| Z754    | V638   | 1     |
| Z755    | V605   | 1     |
| Z758    | V638   | 1     |
| Z759    | V639   | 1     |
| Z764    | V650   | 1     |
| Z800    | V160   | 1     |
| Z801    | V161   | 1     |
| Z803    | V163   | 1     |
| Z8041   | V1642  | 1     |
| Z8048   | V1649  | 1     |
| Z805    | V1659  | 1     |
| Z806    | V166   | 1     |
| Z808    | V168   | 1     |
| Z809    | V169   | 1     |
| Z820    | V172   | 1     |
| Z821    | V190   | 1     |
| Z823    | V171   | 1     |
| Z824    | V173   | 2     |
| Z833    | V180   | 1     |

| <b>ICD10CA</b> | <b>ICD9CM</b> | <b>GRADE</b> |
|----------------|---------------|--------------|
| Z840           | V194          | 1            |
| Z848           | V198          | 1            |
| Z850           | V1009         | 2            |
| Z851           | V1011         | 2            |
| Z852           | V1029         | 2            |
| Z853           | V103          | 1            |
| Z854           | V1049         | 2            |
| Z855           | V1059         | 2            |
| Z856           | V1069         | 2            |
| Z857           | V1079         | 2            |
| Z858           | V1089         | 2            |
| Z859           | V109          | 1            |
| Z8600          | V138          | 3            |
| Z8601          | V138          | 3            |
| Z8602          | V138          | 3            |
| Z861           | V1209         | 2            |
| Z862           | V123          | 2            |
| Z863           | V122          | 2            |
| Z8640          | V1589         | 2            |
| Z8641          | V1589         | 2            |
| Z8642          | V1582         | 1            |
| Z8648          | V1589         | 2            |
| Z865           | V118          | 1            |
| Z866           | V1240         | 1            |
| Z8670          | V1251         | 1            |
| Z8678          | V1259         | 1            |
| Z870           | V126          | 1            |
| Z8710          | V1271         | 1            |
| Z8718          | V1279         | 1            |
| Z872           | V133          | 1            |
| Z873           | V135          | 1            |
| Z874           | V1309         | 2            |
| Z877           | V1369         | 1            |
| Z878           | V138          | 1            |
| Z880           | V140          | 1            |
| Z881           | V141          | 1            |
| Z882           | V142          | 1            |
| Z883           | V143          | 1            |
| Z884           | V144          | 1            |
| Z885           | V145          | 1            |
| Z888           | V148          | 1            |
| Z890           | V4962         | 2            |
| Z891           | V4963         | 2            |

| <b>ICD10CA</b> | <b>ICD9CM</b> | <b>GRADE</b> |
|----------------|---------------|--------------|
| Z892           | V4960         | 1            |
| Z893           | V4960         | 1            |
| Z894           | V4974         | 2            |
| Z895           | V4975         | 1            |
| Z896           | V4976         | 1            |
| Z897           | V4970         | 1            |
| Z899           | V4970         | 3            |
| Z900           | 7388          | 2            |
| Z901           | V4571         | 1            |
| Z902           | 51889         | 1            |
| Z903           | V4589         | 2            |
| Z904           | V4572         | 2            |
| Z905           | V4573         | 1            |
| Z906           | 5968          | 3            |
| Z907           | V475          | 2            |
| Z908           | V470          | 2            |
| Z910           | V150          | 1            |
| Z911           | V1581         | 1            |
| Z912           | V1589         | 1            |
| Z913           | V1589         | 2            |
| Z914           | V1549         | 1            |
| Z915           | V1589         | 1            |
| Z916           | V155          | 1            |
| Z918           | V1589         | 1            |
| Z920           | V157          | 1            |
| Z921           | V1589         | 3            |
| Z9220          | V1589         | 1            |
| Z9221          | V1589         | 1            |
| Z9222          | V1589         | 1            |
| Z9228          | V1589         | 1            |
| Z923           | V153          | 1            |
| Z924           | V152          | 1            |
| Z925           | V1589         | 3            |
| Z926           | V1589         | 1            |
| Z928           | V1589         | 3            |
| Z930           | V440          | 1            |
| Z931           | V441          | 1            |
| Z932           | V442          | 1            |
| Z933           | V443          | 1            |
| Z934           | V444          | 1            |
| Z935           | V4450         | 1            |
| Z936           | V446          | 1            |
| Z938           | V448          | 1            |

| ICD10CA | ICD9CM | GRADE |
|---------|--------|-------|
| Z939    | V449   | 1     |
| Z940    | V420   | 1     |
| Z941    | V421   | 1     |
| Z942    | V426   | 1     |
| Z944    | V427   | 1     |
| Z947    | V425   | 1     |
| Z9480   | V4281  | 1     |
| Z950    | V4501  | 1     |
| Z951    | V4581  | 1     |
| Z952    | V433   | 1     |
| Z953    | V422   | 1     |
| Z954    | V433   | 1     |
| Z955    | V434   | 2     |
| Z958    | V434   | 2     |
| Z959    | V434   | 2     |
| Z960    | V435   | 1     |
| Z961    | V431   | 1     |
| Z962    | V4389  | 2     |
| Z9660   | V4364  | 1     |
| Z9661   | V4365  | 1     |
| Z9668   | V4369  | 1     |
| Z9669   | V4360  | 1     |
| Z967    | V4389  | 3     |
| Z968    | V4389  | 2     |
| Z969    | V4389  | 3     |
| Z970    | V430   | 1     |
| Z971    | V437   | 1     |
| Z972    | V4389  | 3     |
| Z974    | V498   | 2     |
| Z975    | V4551  | 2     |
| Z978    | V499   | 2     |
| Z980    | V453   | 1     |
| Z981    | V454   | 1     |
| Z982    | V452   | 1     |
| Z988    | V4589  | 1     |
| Z991    | V461   | 1     |
| Z992    | V451   | 1     |
| Z993    | V468   | 1     |
| Z998    | V468   | 1     |

| CCI        | ICD9CM | GRADE |
|------------|--------|-------|
| 1AA13HAC2  | 3898   | 0     |
| 1AA35HAK0  | 9922   | 2     |
| 1AA35HAM0  | 9925   | 2     |
| 1AA52HA    | 0124   | 1     |
| 1AA52SE    | 0131   | 1     |
| 1AA52SETS  | 0131   | 1     |
| 1AA52SZ    | 0131   | 1     |
| 1AA52SZTS  | 0131   | 1     |
| 1AA80SZ    | 0212   | 1     |
| 1AA80SZXXA | 0212   | 0     |
| 1AA80SZXXN | 0212   | 1     |
| 1AA87SZ    | 0151   | 1     |
| 1AA87SZXXA | 0151   | 1     |
| 1AA87SZXXK | 0151   | 1     |
| 1AC52DA    | 0239   | 0     |
| 1AC52MBSJ  | 022    | 1     |
| 1AC52MESJ  | 0234   | 1     |
| 1AC52SE    | 022    | 1     |
| 1AC52SESJ  | 0234   | 0     |
| 1AC53DAPL  | 0118   | 2     |
| 1AC53SZPL  | 0118   | 2     |
| 1AC54MESJ  | 0242   | 1     |
| 1AC54MQSJ  | 0242   | 1     |
| 1AC55SZSJ  | 0243   | 2     |
| 1AC87SZGX  | 0159   | 2     |
| 1AF87DAGX  | 0763   | 1     |
| 1AJ87SZGX  | 0159   | 2     |
| 1AN09JADV  | 9427   | 1     |
| 1AN27JA    | 9229   | 2     |
| 1AN27JADA  | 9229   | 0     |
| 1AN27JADE  | 9229   | 0     |
| 1AN27JADG  | 9229   | 0     |
| 1AN27JX    | 9232   | 2     |
| 1AN52SZTS  | 0772   | 1     |
| 1AN87SZAZ  | 0159   | 2     |
| 1AN87SZGX  | 0159   | 2     |
| 1AW27JA    | 9229   | 2     |
| 1AW72DAGX  | 0353   | 2     |
| 1AW72LAGX  | 0353   | 2     |
| 1AW72WKGX  | 0309   | 0     |
| 1AX11HAP1  | 0391   | 1     |
| 1AX11HAP2  | 0391   | 0     |
| 1AX35HAJ2  | 0392   | 0     |



| CCI        | ICD9CM | GRADE |
|------------|--------|-------|
| 1AX35HAP0  | 9929   | 2     |
| 1AX35HAP1  | 9929   | 3     |
| 1AX35HAP2  | 9929   | 3     |
| 1AX35HAT9  | 9929   | 2     |
| 1AX35HHP0  | 9929   | 2     |
| 1AX35HHP1  | 9929   | 3     |
| 1AX35HHP2  | 9929   | 3     |
| 1AX35HHT9  | 9929   | 2     |
| 1AX52HA    | 0309   | 1     |
| 1AX52LA    | 0309   | 1     |
| 1AX53DAFT  | 0390   | 1     |
| 1AX53LAFT  | 0390   | 1     |
| 1AX53LAQK  | 8606   | 2     |
| 1AX87WKGX  | 034    | 1     |
| 1BB35HAJ2  | 0489   | 0     |
| 1BB53LADV  | 0492   | 1     |
| 1BB59HABD  | 042    | 1     |
| 1BG35HAJ2  | 0392   | 0     |
| 1BG35HAP1  | 0391   | 2     |
| 1BM11HAP1  | 0481   | 2     |
| 1BM35HAJ2  | 0489   | 0     |
| 1BM35HAP1  | 0481   | 3     |
| 1BM72LA    | 0449   | 2     |
| 1BM80LA    | 043    | 2     |
| 1BN72LA    | 0449   | 2     |
| 1BN80LA    | 0479   | 0     |
| 1BN87LAXXE | 0407   | 2     |
| 1BN87WF    | 0407   | 2     |
| 1BS11HAP1  | 0481   | 2     |
| 1BS11HAP2  | 0481   | 0     |
| 1BS35HAP1  | 0481   | 2     |
| 1BS72LA    | 0449   | 2     |
| 1BT11HAP1  | 0481   | 2     |
| 1BT35HAJ2  | 0481   | 2     |
| 1BT35HAP1  | 0481   | 2     |
| 1BT72LA    | 0449   | 2     |
| 1BX35HAP1  | 0481   | 2     |
| 1BX72LA    | 0449   | 1     |
| 1CC80LA    | 1159   | 0     |
| 1CC80LAW4  | 1159   | 1     |
| 1CC85LAXXK | 1164   | 1     |
| 1CD53LAKT  | 1449   | 1     |
| 1CH87LAAG  | 1214   | 1     |

| <b>CCI</b> | <b>ICD9CM</b> | <b>GRADE</b> |
|------------|---------------|--------------|
| 1CJ52HA    | 1291          | 1            |
| 1CJ52LAAG  | 1254          | 2            |
| 1CJ52WJ    | 1264          | 1            |
| 1CL53LALN  | 1370          | 0            |
| 1CL55LALN  | 138           | 1            |
| 1CL89NPLM  | 1371          | 2            |
| 1CL89NPLN  | 1371          | 2            |
| 1CL89NV    | 1311          | 1            |
| 1CL89NVLP  | 1319          | 0            |
| 1CL89VR    | 1341          | 1            |
| 1CL89VRLM  | 1371          | 2            |
| 1CL89VRLN  | 1371          | 2            |
| 1CL89VRLP  | 1341          | 0            |
| 1CM35HAQ5  | 9929          | 1            |
| 1CM35HAV0  | 1475          | 1            |
| 1CM89LL    | 1473          | 1            |
| 1CM89PF    | 1474          | 1            |
| 1CM89PFG2  | 1474          | 1            |
| 1CM89PFV0  | 1479          | 0            |
| 1CN59LAAG  | 1424          | 1            |
| 1CN59LAGY  | 1429          | 1            |
| 1CN72LA    | 149           | 1            |
| 1CP80LA    | 1689          | 2            |
| 1CP80LAXXN | 1689          | 2            |
| 1CQ35HAL7  | 1691          | 1            |
| 1CQ35HAT9  | 1691          | 1            |
| 1CS35HAT9  | 1091          | 1            |
| 1CS35JAQ5  | 1099          | 0            |
| 1CX52LA    | 0809          | 2            |
| 1CX55JAFF  | 9738          | 1            |
| 1CX59JAGX  | 0825          | 1            |
| 1CX74RZ    | 0838          | 1            |
| 1CX74TV    | 0849          | 0            |
| 1CX74UO    | 0842          | 1            |
| 1CX74UX    | 0842          | 1            |
| 1CX74WQ    | 0852          | 1            |
| 1CX80LA    | 0881          | 1            |
| 1CX80WJXXE | 0889          | 1            |
| 1CX87LA    | 0821          | 1            |
| 1CX87LAXXA | 0821          | 1            |
| 1CX88UDXXE | 0824          | 2            |
| 1CX88VPXXE | 0823          | 2            |
| 1CZ27JA    | 9229          | 0            |

| <b>CCI</b> | <b>ICD9CM</b> | <b>GRADE</b> |
|------------|---------------|--------------|
| 1CZ52LA    | 1699          | 2            |
| 1DA52HA    | 189           | 2            |
| 1DA80LA    | 1879          | 1            |
| 1DA80LAXXA | 1879          | 2            |
| 1DA87LA    | 1829          | 1            |
| 1DE35CAD3  | 9652          | 1            |
| 1DE35CAZ9  | 9929          | 2            |
| 1DE57BAGX  | 9652          | 1            |
| 1DE57BAZ9  | 9811          | 0            |
| 1DE57CAD1  | 9652          | 1            |
| 1DE57CAGX  | 9652          | 2            |
| 1DE57CATJ  | 9811          | 0            |
| 1DE57CAZ9  | 9652          | 1            |
| 1DE86MG    | 186           | 0            |
| 1DF53JATS  | 2001          | 1            |
| 1DF80XGXXA | 194           | 1            |
| 1EA55LAKD  | 0299          | 2            |
| 1EA55LANW  | 0207          | 0            |
| 1EA74LANWG | 0202          | 1            |
| 1EA80LANW  | 0205          | 1            |
| 1EA87LA    | 0125          | 1            |
| 1EB73LA    | 7672          | 1            |
| 1EC73LA    | 7679          | 2            |
| 1EC74LAKDN | 7679          | 2            |
| 1EC74LANW  | 7679          | 2            |
| 1EC74LANWA | 7679          | 2            |
| 1ED74LANW  | 7674          | 1            |
| 1EE55LANW  | 7697          | 2            |
| 1EE73JA    | 7675          | 1            |
| 1EE74LANW  | 7676          | 1            |
| 1EE74LANWA | 7676          | 1            |
| 1EE87LA    | 7631          | 0            |
| 1EF03JAFA  | 247           | 1            |
| 1EH74LANW  | 7674          | 2            |
| 1EL52WK    | 8303          | 2            |
| 1EL72JA    | 765           | 0            |
| 1EL73JA    | 7693          | 1            |
| 1EM80LA    | 245           | 1            |
| 1EN80LA    | 245           | 1            |
| 1EP09JADV  | 9339          | 0            |
| 1EP35HAL7  | 9957          | 1            |
| 1EQ27JA    | 9229          | 2            |
| 1EQ52HA    | 8395          | 2            |

| CCI        | ICD9CM | GRADE |
|------------|--------|-------|
| 1EQ52LA    | 8309   | 2     |
| 1EQ87LA    | 8349   | 2     |
| 1ES87LA    | 215    | 1     |
| 1ET13CABC  | 2109   | 2     |
| 1ET13CAC2  | 2109   | 1     |
| 1ET13CAGX  | 2109   | 1     |
| 1ET13CAHB  | 2103   | 1     |
| 1ET13CANP  | 2101   | 2     |
| 1ET13CAZ9  | 2109   | 1     |
| 1ET55CANP  | 9732   | 0     |
| 1ET59BAGX  | 2131   | 2     |
| 1ET59LAGX  | 2162   | 2     |
| 1ET73JA    | 2171   | 1     |
| 1ET80LA    | 2187   | 1     |
| 1ET87BAGX  | 2131   | 1     |
| 1EY87BA    | 2260   | 2     |
| 1FA52CATJ  | 9653   | 1     |
| 1FA53CANB  | 9601   | 1     |
| 1FA87BAAG  | 2933   | 1     |
| 1FD80LA    | 242    | 1     |
| 1FE38JAPM  | 9997   | 2     |
| 1FE57JA    | 2309   | 2     |
| 1FE89LA    | 2319   | 1     |
| 1FE89WL    | 2319   | 1     |
| 1FF89LL    | 2373   | 1     |
| 1FG27JADE  | 9229   | 0     |
| 1FG35HAP1  | 9929   | 3     |
| 1FG59JAX7  | 2799   | 0     |
| 1FG80LA    | 2752   | 1     |
| 1FH80LAXXE | 8669   | 0     |
| 1FH87LA    | 2749   | 1     |
| 1FJ13JAGX  | 3998   | 1     |
| 1FJ27JA    | 9229   | 2     |
| 1FM35HAL7  | 9929   | 2     |
| 1FM50CABP  | 2691   | 1     |
| 1FM52HA    | 2699   | 1     |
| 1FM89LA    | 2632   | 0     |
| 1FP27JA    | 9229   | 2     |
| 1FU27JA    | 9229   | 2     |
| 1FU52HA    | 0601   | 0     |
| 1FU59CAV1  | 9228   | 2     |
| 1FU87NZ    | 0639   | 1     |
| 1FU89NZ    | 064    | 1     |

| <b>CCI</b> | <b>ICD9CM</b> | <b>GRADE</b> |
|------------|---------------|--------------|
| 1FV87NZ    | 0689          | 1            |
| 1FV89NZ    | 0681          | 1            |
| 1FX27JADE  | 9229          | 0            |
| 1FX50BABP  | 2991          | 1            |
| 1FX56CA    | 9813          | 1            |
| 1FX87BA    | 2933          | 1            |
| 1FX87LA    | 2933          | 1            |
| 1GA87BA    | 3009          | 2            |
| 1GA87BAAG  | 3009          | 2            |
| 1GE87BA    | 3029          | 1            |
| 1GJ50BANR  | 3199          | 2            |
| 1GJ50CANG  | 9604          | 1            |
| 1GJ50CATS  | 3199          | 0            |
| 1GJ52CATJ  | 9656          | 2            |
| 1GJ53BAPM  | 3195          | 1            |
| 1GJ53LAPM  | 3195          | 1            |
| 1GJ54JANG  | 9723          | 1            |
| 1GJ54JATS  | 9723          | 1            |
| 1GJ55BANR  | 9739          | 1            |
| 1GJ55CAEB  | 9739          | 2            |
| 1GJ55CANG  | 9739          | 1            |
| 1GJ55CATS  | 9739          | 1            |
| 1GJ55JAEB  | 9739          | 2            |
| 1GJ55LAPM  | 313           | 2            |
| 1GJ56BA    | 9815          | 1            |
| 1GJ56BATJ  | 9815          | 1            |
| 1GJ56CA    | 9815          | 1            |
| 1GJ56JACD  | 9815          | 1            |
| 1GJ77HA    | 3129          | 1            |
| 1GJ77LA    | 3129          | 1            |
| 1GJ77LALG  | 311           | 1            |
| 1GJ80DA    | 3179          | 1            |
| 1GJ80LA    | 3179          | 0            |
| 1GJ82LA    | 3172          | 1            |
| 1GJ86ME    | 3173          | 1            |
| 1GJ87LA    | 315           | 1            |
| 1GM35BAD2  | 9605          | 1            |
| 1GM52BATJ  | 9605          | 1            |
| 1GM52CATJ  | 9605          | 1            |
| 1GM56BA    | 9815          | 1            |
| 1GM56BATJ  | 9815          | 1            |
| 1GR35BAD2  | 9656          | 2            |
| 1GR87QB    | 323           | 1            |

| CCI        | ICD9CM | GRADE |
|------------|--------|-------|
| 1GR89QB    | 324    | 1     |
| 1GT27JA    | 9229   | 2     |
| 1GT27JADC  | 9229   | 0     |
| 1GT27JADE  | 9229   | 0     |
| 1GT27JX    | 9229   | 0     |
| 1GT35CAT9  | 9929   | 2     |
| 1GT52DA    | 331    | 1     |
| 1GT52HA    | 3393   | 1     |
| 1GT52HHTJ  | 3393   | 2     |
| 1GT56DA    | 331    | 1     |
| 1GT59DAGX  | 3228   | 1     |
| 1GV35HA1C  | 9929   | 0     |
| 1GV35HAC1  | 9929   | 0     |
| 1GV52DA    | 3409   | 2     |
| 1GV52DATS  | 3404   | 1     |
| 1GV52HA    | 3491   | 1     |
| 1GV52HAHE  | 3409   | 1     |
| 1GV52HATK  | 3409   | 1     |
| 1GV52LA    | 3409   | 1     |
| 1GV52LATS  | 3404   | 1     |
| 1GV55JATS  | 9741   | 1     |
| 1GV59HAZ9  | 346    | 1     |
| 1GV80LA    | 3493   | 0     |
| 1GV87DA    | 3459   | 0     |
| 1GV87LA    | 3459   | 0     |
| 1GW52DA    | 3491   | 0     |
| 1GX80LB    | 3484   | 1     |
| 1GX80LBXXN | 537    | 1     |
| 1GX80QB    | 3482   | 1     |
| 1GX80QF    | 5380   | 1     |
| 1GX80QFXXN | 3484   | 0     |
| 1GY13LA    | 3499   | 0     |
| 1GY72LA    | 3499   | 0     |
| 1GZ02YC    | 9318   | 0     |
| 1GZ02YD    | 9318   | 0     |
| 1GZ12ZZ    | 9399   | 2     |
| 1GZ30CJ    | 9393   | 1     |
| 1GZ30JH    | 9393   | 1     |
| 1GZ31CAEP  | 9393   | 1     |
| 1GZ31CAMP  | 9399   | 0     |
| 1GZ31CAND  | 9391   | 1     |
| 1GZ31CAPK  | 9399   | 2     |
| 1GZ31CBEP  | 9393   | 1     |

| CCI        | ICD9CM | GRADE |
|------------|--------|-------|
| 1GZ31CBND  | 9390   | 2     |
| 1GZ31CRND  | 9391   | 1     |
| 1GZ31GPND  | 9391   | 1     |
| 1GZ31JANC  | 9399   | 2     |
| 1GZ32CAMU  | 9396   | 0     |
| 1GZ32CAMX  | 9395   | 1     |
| 1GZ35CAR3  | 9394   | 1     |
| 1GZ35CAT9  | 9394   | 1     |
| 1GZ38JAND  | 9391   | 2     |
| 1GZ52JM    | 9399   | 0     |
| 1HA52DA    | 3712   | 1     |
| 1HA52HA    | 370    | 1     |
| 1HA52HATS  | 370    | 1     |
| 1HA52QB    | 3712   | 1     |
| 1HA59HAZ9  | 3733   | 1     |
| 1HA80QB    | 374    | 0     |
| 1HA87DA    | 3731   | 1     |
| 1HB53LAJA  | 3770   | 1     |
| 1HB54LAJA  | 3775   | 1     |
| 1HD53GRJA  | 3770   | 1     |
| 1HD54GRJA  | 3775   | 1     |
| 1HH59DAGX  | 3799   | 2     |
| 1HH59GPAW  | 3734   | 1     |
| 1HH59GPGX  | 3734   | 2     |
| 1HM80LA    | 374    | 2     |
| 1HM80LAXXL | 374    | 2     |
| 1HP78LA    | 3534   | 0     |
| 1HP80LA    | 374    | 2     |
| 1HS80LA    | 3514   | 1     |
| 1HU80LA    | 3512   | 1     |
| 1HU80LAFE  | 3512   | 1     |
| 1HU90LAXXL | 3523   | 1     |
| 1HV80GPBD  | 3596   | 2     |
| 1HV80LA    | 3511   | 1     |
| 1HV90GPXXL | 3522   | 0     |
| 1HV90LACF  | 3522   | 1     |
| 1HV90LACFL | 3511   | 0     |
| 1HV90LAXXL | 3521   | 1     |
| 1HV90LAXXQ | 3521   | 0     |
| 1HV90WJXXL | 3521   | 1     |
| 1HZ03LATA  | 3963   | 3     |
| 1HZ09JAFS  | 9962   | 1     |
| 1HZ09JAJF  | 9962   | 1     |

| CCI        | ICD9CM | GRADE |
|------------|--------|-------|
| 1HZ09LACJ  | 3791   | 1     |
| 1HZ09LAFS  | 3791   | 1     |
| 1HZ30JN    | 9960   | 1     |
| 1HZ30JY    | 9963   | 0     |
| 1HZ35HAT9  | 3792   | 1     |
| 1HZ35HZJ2  | 3792   | 2     |
| 1HZ37JANN  | 9969   | 1     |
| 1HZ38GRNN  | 3777   | 1     |
| 1HZ38JANN  | 3779   | 2     |
| 1HZ53GRFR  | 3780   | 1     |
| 1HZ53GRFS  | 3794   | 1     |
| 1HZ53GRNK  | 3783   | 1     |
| 1HZ53GRNL  | 3781   | 2     |
| 1HZ53GRNM  | 3782   | 1     |
| 1HZ53GRNN  | 3778   | 1     |
| 1HZ53HAFS  | 3794   | 1     |
| 1HZ53LANK  | 3783   | 1     |
| 1HZ53LANM  | 3782   | 1     |
| 1HZ53LANN  | 3778   | 2     |
| 1HZ53QANM  | 3782   | 1     |
| 1HZ55GPNK  | 3789   | 1     |
| 1HZ55GPNM  | 3789   | 1     |
| 1HZ55LANM  | 3789   | 1     |
| 1HZ56LA    | 3711   | 2     |
| 1IA57LAGX  | 3814   | 1     |
| 1IA79LA    | 3814   | 2     |
| 1IA80LAXXN | 3957   | 2     |
| 1IA87LA    | 3834   | 1     |
| 1IB80GQNRN | 3957   | 1     |
| 1IC53GQQL  | 3761   | 1     |
| 1IC53LAQL  | 3761   | 1     |
| 1IC55GQQL  | 3949   | 2     |
| 1IC87LA    | 3834   | 1     |
| 1ID53GQQL  | 3761   | 1     |
| 1ID57LAGX  | 3814   | 1     |
| 1ID80LAXXA | 3931   | 0     |
| 1IJ50QBD   | 3601   | 1     |
| 1IJ50QNR   | 3601   | 2     |
| 1IJ50QQA   | 3601   | 2     |
| 1IJ50QQOD  | 3601   | 2     |
| 1IJ50QQOE  | 3601   | 2     |
| 1IJ50QUOA  | 3601   | 2     |
| 1IJ57QQFV  | 3601   | 0     |



| CCI        | ICD9CM | GRADE |
|------------|--------|-------|
| 1IJ57GQOA  | 3601   | 0     |
| 1IJ57LAGX  | 3603   | 1     |
| 1IJ57LAGXA | 3603   | 0     |
| 1IJ76LAXXA | 3611   | 1     |
| 1IJ76LAXXG | 3615   | 1     |
| 1IJ76LAXXQ | 3611   | 2     |
| 1IL35HAC1  | 9910   | 1     |
| 1IL35HHC1  | 3604   | 1     |
| 1IL35HHM8  | 3604   | 0     |
| 1IL35HHT9  | 3604   | 2     |
| 1IL35HZM3  | 9929   | 2     |
| 1IL35HZM8  | 9929   | 2     |
| 1IS50GRBD  | 3805   | 2     |
| 1IS51GRFK  | 387    | 1     |
| 1IS51GRKA  | 387    | 1     |
| 1IS53GRLF  | 3893   | 1     |
| 1IS53HNLF  | 8607   | 1     |
| 1IS53LALF  | 8607   | 2     |
| 1IS54GRGX  | 9657   | 2     |
| 1IS54HALF  | 9657   | 2     |
| 1IS54JALF  | 9657   | 2     |
| 1IS55GRFK  | 3949   | 3     |
| 1IS55GRKA  | 3949   | 3     |
| 1IS55GRLF  | 3949   | 3     |
| 1IS55GRLG  | 3949   | 0     |
| 1IS55LAKA  | 3949   | 3     |
| 1IS55LALF  | 3949   | 3     |
| 1IS55LALG  | 3949   | 0     |
| 1JE50GQOA  | 3950   | 2     |
| 1JE57GQOC  | 3812   | 2     |
| 1JE57LAFVN | 3812   | 1     |
| 1JE57LAGX  | 3812   | 1     |
| 1JE57LAGXA | 3812   | 1     |
| 1JE57LAGXN | 3812   | 1     |
| 1JE76MVXXN | 3922   | 1     |
| 1JE76MXXXN | 3922   | 1     |
| 1JJ50GQBD  | 3950   | 2     |
| 1JJ57GQFV  | 3815   | 2     |
| 1JJ87LA    | 3833   | 0     |
| 1JL57LAGX  | 3815   | 2     |
| 1JL58LAXXG | 3865   | 1     |
| 1JM50GQBD  | 3950   | 1     |
| 1JM50GQBP  | 3959   | 0     |

| CCI        | ICD9CM | GRADE |
|------------|--------|-------|
| 1JM50GQOA  | 3959   | 0     |
| 1JM57GQGX  | 3813   | 2     |
| 1JM57LA    | 3813   | 2     |
| 1JM57LAXXA | 3813   | 2     |
| 1JM58LA    | 3863   | 2     |
| 1JM76MIXXN | 3929   | 1     |
| 1JM80LA    | 3931   | 2     |
| 1JM80LAXXA | 3956   | 2     |
| 1JM82LA    | 3949   | 2     |
| 1JM82LAXXA | 3949   | 2     |
| 1JM87LA    | 3863   | 2     |
| 1JQ51LA    | 3882   | 0     |
| 1JQ53GRLG  | 8607   | 1     |
| 1JQ55GRLG  | 3949   | 2     |
| 1JQ55LALG  | 3949   | 2     |
| 1JT50GRBD  | 3959   | 2     |
| 1JT50GROA  | 3959   | 0     |
| 1JT53GRLG  | 8607   | 1     |
| 1JT55GRLG  | 3949   | 2     |
| 1JU50GRBD  | 3959   | 3     |
| 1JU58LA    | 3863   | 2     |
| 1JU80LA    | 3932   | 2     |
| 1JW51GPGE  | 3952   | 1     |
| 1JW51SZFF  | 124    | 0     |
| 1JW80SZ    | 3831   | 0     |
| 1JX50GPBD  | 3959   | 0     |
| 1JX51BAGX  | 3882   | 1     |
| 1JX51GPGX  | 3882   | 2     |
| 1JX51LAGX  | 3882   | 0     |
| 1KA50GQBD  | 3959   | 0     |
| 1KA50GQOA  | 3950   | 2     |
| 1KA55GQQLN | 3764   | 0     |
| 1KA57LAGX  | 3814   | 1     |
| 1KA76MZXXK | 3925   | 1     |
| 1KA76MZXXN | 3925   | 1     |
| 1KA80GQNRN | 3957   | 2     |
| 1KA80LA    | 3844   | 0     |
| 1KA80LAXXN | 3957   | 2     |
| 1KA87LAXXN | 3844   | 1     |
| 1KE35HAC1  | 9919   | 2     |
| 1KE50GQBD  | 3950   | 2     |
| 1KE50GQOA  | 3950   | 2     |
| 1KE50LABD  | 3806   | 0     |

| CCI        | ICD9CM | GRADE |
|------------|--------|-------|
| 1KE51GQC2  | 3886   | 2     |
| 1KE51GQGE  | 3886   | 1     |
| 1KE51GQW0  | 3886   | 2     |
| 1KE51LA    | 3886   | 1     |
| 1KE55GQNR  | 3949   | 0     |
| 1KE76MZXXN | 3925   | 2     |
| 1KE80LA    | 3931   | 2     |
| 1KE87LA    | 3866   | 0     |
| 1KG35GQM8  | 9929   | 0     |
| 1KG35HAC1  | 9919   | 2     |
| 1KG35HHC1  | 9919   | 2     |
| 1KG50GQBD  | 3950   | 2     |
| 1KG50GQBP  | 3950   | 2     |
| 1KG50GQOA  | 3959   | 2     |
| 1KG50LABD  | 3950   | 2     |
| 1KG50LAOA  | 3950   | 2     |
| 1KG51GQC2  | 3888   | 2     |
| 1KG51GQGE  | 3888   | 2     |
| 1KG51GQW3  | 3888   | 2     |
| 1KG51LA    | 3888   | 1     |
| 1KG51LAFF  | 3888   | 1     |
| 1KG57GQGX  | 3818   | 1     |
| 1KG57GQGXL | 3818   | 1     |
| 1KG57GQOC  | 3818   | 2     |
| 1KG57LAFV  | 3818   | 1     |
| 1KG57LAFVN | 3818   | 1     |
| 1KG57LAGX  | 3818   | 1     |
| 1KG57LAGXL | 3818   | 0     |
| 1KG57LAGXN | 3818   | 1     |
| 1KG76MIXXA | 3929   | 2     |
| 1KG76MIXXN | 3929   | 2     |
| 1KG80GQNRN | 3838   | 0     |
| 1KG80LA    | 3931   | 2     |
| 1KG80LAXXA | 3956   | 2     |
| 1KG87LA    | 3838   | 1     |
| 1KG87LAXXL | 3848   | 1     |
| 1KG87LAXXN | 3848   | 1     |
| 1KQ76GPNR  | 391    | 2     |
| 1KR34JFGN  | 9359   | 0     |
| 1KR51LA    | 3889   | 1     |
| 1KR53GRLG  | 8607   | 2     |
| 1KR55LALG  | 3949   | 0     |
| 1KR58DA    | 3869   | 2     |

| CCI        | ICD9CM | GRADE |
|------------|--------|-------|
| 1KR58LA    | 3869   | 1     |
| 1KR58WK    | 3869   | 0     |
| 1KR76MZXXA | 3929   | 2     |
| 1KR76MZXXN | 3929   | 2     |
| 1KR80LA    | 3932   | 1     |
| 1KT50GQBD  | 3959   | 3     |
| 1KT50GQOA  | 3959   | 2     |
| 1KT50LABD  | 3959   | 0     |
| 1KT51GQ    | 3886   | 2     |
| 1KT51GQC2  | 3886   | 1     |
| 1KT51GQGE  | 3886   | 1     |
| 1KT51GQGF  | 3886   | 2     |
| 1KT51GQW3  | 3886   | 2     |
| 1KT51LAW3  | 3886   | 2     |
| 1KT57LAGX  | 3816   | 2     |
| 1KT80LA    | 3930   | 2     |
| 1KT80LAXXN | 3957   | 2     |
| 1KV13HAC2  | 9929   | 2     |
| 1KV13JAGN  | 3998   | 2     |
| 1KV35HAC1  | 9919   | 2     |
| 1KV35HH1C  | 9910   | 2     |
| 1KV35HHC1  | 3997   | 2     |
| 1KV53HACH  | 3891   | 1     |
| 1KV53HAFT  | 3891   | 1     |
| 1KV53LAFT  | 3891   | 1     |
| 1KV55JACH  | 3891   | 3     |
| 1KV55JAFT  | 3891   | 3     |
| 1KV80LA    | 3931   | 1     |
| 1KV80LAXXA | 3956   | 1     |
| 1KX13JN    | 9359   | 2     |
| 1KX35HH1C  | 9910   | 2     |
| 1KX35HHC1  | 3997   | 2     |
| 1KX35HHT9  | 3997   | 2     |
| 1KX53HAFT  | 3893   | 2     |
| 1KX53LAFT  | 3894   | 1     |
| 1KX54GRGX  | 9657   | 2     |
| 1KX55JACH  | 3893   | 3     |
| 1KX55JAFT  | 9999   | 0     |
| 1KX80LA    | 3959   | 1     |
| 1KY50GPBD  | 3949   | 2     |
| 1KY76LA    | 3927   | 1     |
| 1KY76LASJ  | 3927   | 1     |
| 1KY76LAXXA | 3927   | 1     |

| CCI        | ICD9CM | GRADE |
|------------|--------|-------|
| 1KY76LAXXN | 3927   | 1     |
| 1KY80LA    | 3942   | 1     |
| 1KZ51LA    | 3880   | 1     |
| 1KZ59LAGX  | 3800   | 1     |
| 1KZ86MP    | 3959   | 0     |
| 1LC84LAXXA | 3563   | 1     |
| 1LZ19HHU1A | 9904   | 1     |
| 1LZ19HHU1J | 9904   | 1     |
| 1LZ19HHU2A | 9907   | 1     |
| 1LZ19HHU2J | 9907   | 1     |
| 1LZ19HHU4J | 9905   | 1     |
| 1LZ19HHU7J | 4105   | 1     |
| 1LZ19HHU9J | 9903   | 1     |
| 1LZ35CAE6  | 9929   | 0     |
| 1LZ35HAC1  | 9929   | 0     |
| 1LZ35HAC5  | 9909   | 1     |
| 1LZ35HAC6  | 9915   | 1     |
| 1LZ35HHC1  | 3604   | 0     |
| 1LZ35HHC5  | 9909   | 1     |
| 1LZ35HHC6  | 9915   | 1     |
| 1LZ35HHC7  | 9918   | 0     |
| 1LZ35HHT7  | 9929   | 1     |
| 1LZ35HHT9  | 9929   | 1     |
| 1LZ35HHZ9  | 9929   | 1     |
| 1LZ35HRC6  | 9915   | 1     |
| 1LZ37GPQM  | 3965   | 1     |
| 1LZ37LAFP  | 3961   | 3     |
| 1LZ37LAGB  | 3961   | 1     |
| 1LZ38JAFP  | 3961   | 3     |
| 1LZ52HA    | 3809   | 3     |
| 1LZ52HB    | 3809   | 3     |
| 1MD27JA    | 9229   | 2     |
| 1MD87LA    | 4023   | 1     |
| 1MF27JA    | 9229   | 2     |
| 1MG87LA    | 4029   | 2     |
| 1MG89LA    | 4059   | 2     |
| 1MH87LA    | 4029   | 2     |
| 1MJ87LA    | 4024   | 1     |
| 1ML52HA    | 400    | 2     |
| 1MS34JAGN  | 9359   | 0     |
| 1NA13BA    | 9606   | 2     |
| 1NA13BAFA  | 4233   | 2     |
| 1NA13BAGX  | 3998   | 1     |

| CCI        | ICD9CM | GRADE |
|------------|--------|-------|
| 1NA13BAKK  | 4233   | 1     |
| 1NA13BAX7  | 4233   | 1     |
| 1NA13DAE3  | 4233   | 1     |
| 1NA27JA    | 9229   | 2     |
| 1NA27JADA  | 9229   | 0     |
| 1NA35BAL7  | 4233   | 0     |
| 1NA35HAL7  | 9957   | 3     |
| 1NA50BABD  | 4292   | 1     |
| 1NA50BABJ  | 4292   | 1     |
| 1NA50BABL  | 4292   | 1     |
| 1NA50BABP  | 4292   | 1     |
| 1NA50BANR  | 4292   | 1     |
| 1NA50CABJ  | 4292   | 1     |
| 1NA52BA    | 4209   | 1     |
| 1NA52CANR  | 4281   | 1     |
| 1NA52CATS  | 4281   | 1     |
| 1NA56BA    | 9802   | 1     |
| 1NA59BAAG  | 4233   | 1     |
| 1NA59BAGX  | 4233   | 1     |
| 1NA80LBXXE | 4289   | 0     |
| 1NA80LP    | 4282   | 1     |
| 1NA80QB    | 4282   | 1     |
| 1NA87BA    | 4233   | 1     |
| 1NA87DD    | 4241   | 1     |
| 1NA87LP    | 4241   | 1     |
| 1NA87LQ    | 4241   | 1     |
| 1NE50BA    | 4422   | 1     |
| 1NE80DA    | 4429   | 0     |
| 1NE80LA    | 4429   | 1     |
| 1NE80XN    | 4429   | 1     |
| 1NF13BA    | 4443   | 1     |
| 1NF13BAC2  | 4443   | 1     |
| 1NF13BAFA  | 4443   | 1     |
| 1NF13BAGX  | 4443   | 1     |
| 1NF13BAKK  | 4443   | 1     |
| 1NF13BAX7  | 4443   | 1     |
| 1NF13GPC2  | 4444   | 1     |
| 1NF35CAT9  | 966    | 0     |
| 1NF50BABL  | 4493   | 1     |
| 1NF50BABP  | 4499   | 2     |
| 1NF52CAQN  | 9607   | 1     |
| 1NF52CATL  | 9607   | 2     |
| 1NF53BABC  | 4493   | 1     |

| CCI        | ICD9CM | GRADE |
|------------|--------|-------|
| 1NF53BTQB  | 4319   | 1     |
| 1NF53BTTS  | 4319   | 1     |
| 1NF53CATS  | 9607   | 1     |
| 1NF53DAQB  | 4311   | 1     |
| 1NF53DATS  | 4311   | 1     |
| 1NF53HATS  | 4311   | 1     |
| 1NF53LATS  | 4319   | 1     |
| 1NF54HAQB  | 9636   | 3     |
| 1NF54HATS  | 9636   | 3     |
| 1NF54JATS  | 9634   | 1     |
| 1NF55BATS  | 9759   | 1     |
| 1NF55CATS  | 9759   | 1     |
| 1NF55HATS  | 9751   | 1     |
| 1NF55JATS  | 9759   | 0     |
| 1NF56BA    | 9803   | 1     |
| 1NF59BAGX  | 4341   | 2     |
| 1NF73BA    | 4499   | 3     |
| 1NF74LA    | 4464   | 0     |
| 1NF76RJ    | 4431   | 1     |
| 1NF80DA    | 4462   | 1     |
| 1NF80LA    | 4461   | 1     |
| 1NF80LAXXE | 4441   | 1     |
| 1NF87BA    | 4341   | 1     |
| 1NF87DA    | 4341   | 1     |
| 1NF87LA    | 4342   | 1     |
| 1NF87RJ    | 437    | 1     |
| 1NK50BABD  | 4685   | 1     |
| 1NK52BA    | 9608   | 1     |
| 1NK52BATS  | 9608   | 0     |
| 1NK52CA    | 9608   | 1     |
| 1NK52CATS  | 9608   | 1     |
| 1NK52DA    | 4502   | 1     |
| 1NK52HA    | 9608   | 1     |
| 1NK52LA    | 4502   | 1     |
| 1NK52UW    | 4681   | 1     |
| 1NK53BTTS  | 4632   | 1     |
| 1NK53CATS  | 9608   | 1     |
| 1NK53DATS  | 4632   | 1     |
| 1NK53HATS  | 4639   | 2     |
| 1NK53LAQB  | 4639   | 1     |
| 1NK53LATS  | 4639   | 1     |
| 1NK54HATS  | 9752   | 3     |
| 1NK55CATS  | 9752   | 1     |

| <b>CCI</b> | <b>ICD9CM</b> | <b>GRADE</b> |
|------------|---------------|--------------|
| 1NK56LA    | 4502          | 2            |
| 1NK58LAXXG | 4551          | 1            |
| 1NK59BAGX  | 4534          | 2            |
| 1NK59BAKK  | 4534          | 2            |
| 1NK76DQ    | 4439          | 1            |
| 1NK76RE    | 4593          | 1            |
| 1NK76RF    | 4590          | 1            |
| 1NK76RJ    | 4439          | 1            |
| 1NK77EM    | 4632          | 1            |
| 1NK77EN    | 4623          | 1            |
| 1NK77RQ    | 4632          | 1            |
| 1NK77RR    | 4623          | 1            |
| 1NK80DA    | 4679          | 2            |
| 1NK80DAXXE | 4442          | 2            |
| 1NK80LA    | 4673          | 2            |
| 1NK80LAXXE | 4442          | 2            |
| 1NK82RR    | 4651          | 1            |
| 1NK87BA    | 4530          | 1            |
| 1NK87DN    | 4562          | 2            |
| 1NK87LA    | 4562          | 2            |
| 1NK87RE    | 4562          | 2            |
| 1NK87RF    | 4562          | 2            |
| 1NK87TF    | 4562          | 2            |
| 1NK87TG    | 4562          | 2            |
| 1NM27JA    | 9229          | 2            |
| 1NM35BAX4  | 9643          | 3            |
| 1NM50BA    | 4685          | 0            |
| 1NM50BABD  | 4685          | 1            |
| 1NM50BANR  | 4685          | 2            |
| 1NM50CANR  | 4685          | 0            |
| 1NM52CA    | 9609          | 2            |
| 1NM52CATS  | 9609          | 2            |
| 1NM52DA    | 4503          | 2            |
| 1NM52HATS  | 9608          | 2            |
| 1NM52LA    | 4503          | 2            |
| 1NM52LATS  | 4503          | 1            |
| 1NM52UW    | 4503          | 0            |
| 1NM54JATS  | 9753          | 3            |
| 1NM56BA    | 9804          | 1            |
| 1NM59BAGX  | 4543          | 1            |
| 1NM74LA    | 4663          | 1            |
| 1NM76RN    | 4594          | 1            |
| 1NM77EP    | 4610          | 0            |



| CCI        | ICD9CM | GRADE |
|------------|--------|-------|
| 1NM77RS    | 4610   | 1     |
| 1NM77RSXXG | 4610   | 0     |
| 1NM80LA    | 4675   | 1     |
| 1NM80LAXXE | 4675   | 1     |
| 1NM87BA    | 4542   | 1     |
| 1NM87DA    | 4579   | 2     |
| 1NM87DF    | 4579   | 2     |
| 1NM87DX    | 4579   | 2     |
| 1NM87LA    | 4579   | 2     |
| 1NM87RD    | 4576   | 2     |
| 1NM87RE    | 4573   | 2     |
| 1NM87RN    | 4579   | 2     |
| 1NM87TF    | 4579   | 2     |
| 1NM87TG    | 4574   | 2     |
| 1NM89RN    | 458    | 2     |
| 1NM89TF    | 458    | 1     |
| 1NM91RE    | 458    | 2     |
| 1NP13BAAN  | 4523   | 0     |
| 1NP13BAC2  | 4443   | 2     |
| 1NP13BAGN  | 4443   | 1     |
| 1NP13BAGX  | 4443   | 1     |
| 1NP13BAKK  | 4443   | 1     |
| 1NP13BAX7  | 9929   | 2     |
| 1NP13GQC2  | 4444   | 1     |
| 1NP13GQGE  | 3880   | 2     |
| 1NP13GQW0  | 3880   | 2     |
| 1NP16CAZ9  | 4695   | 1     |
| 1NP72DA    | 5451   | 1     |
| 1NP72LA    | 5459   | 1     |
| 1NP73BA    | 4680   | 1     |
| 1NP73JH    | 9627   | 1     |
| 1NP73LA    | 4680   | 1     |
| 1NP86ME    | 4674   | 0     |
| 1NP86MHXXE | 4676   | 1     |
| 1NP86MR    | 4676   | 1     |
| 1NQ12JJ    | 9993   | 1     |
| 1NQ13BAGX  | 9609   | 3     |
| 1NQ13BAKK  | 4832   | 2     |
| 1NQ13CAC2  | 9929   | 2     |
| 1NQ13CAGN  | 9609   | 2     |
| 1NQ14CANP  | 9619   | 1     |
| 1NQ27JA    | 9229   | 2     |
| 1NQ35CAA6  | 9638   | 1     |

| <b>CCI</b> | <b>ICD9CM</b> | <b>GRADE</b> |
|------------|---------------|--------------|
| 1NQ35CAD2  | 9637          | 1            |
| 1NQ35CAT9  | 9929          | 0            |
| 1NQ35CAX9  | 9638          | 1            |
| 1NQ35CAZ9  | 9929          | 0            |
| 1NQ35HAT9  | 9929          | 2            |
| 1NQ50CABP  | 9722          | 0            |
| 1NQ52BA    | 9638          | 1            |
| 1NQ52LA    | 9609          | 0            |
| 1NQ52LATS  | 481           | 1            |
| 1NQ53CATS  | 9609          | 1            |
| 1NQ55JATS  | 9759          | 0            |
| 1NQ57CJ    | 9638          | 1            |
| 1NQ59BAGX  | 4835          | 1            |
| 1NQ72DA    | 480           | 1            |
| 1NQ73CJ    | 9626          | 1            |
| 1NQ74BA    | 4876          | 0            |
| 1NQ74PC    | 4876          | 1            |
| 1NQ74PD    | 4876          | 1            |
| 1NQ80PB    | 4879          | 1            |
| 1NQ87BA    | 4835          | 1            |
| 1NQ87BAFA  | 4945          | 1            |
| 1NQ87LA    | 4836          | 1            |
| 1NQ87RD    | 4863          | 1            |
| 1NQ87TF    | 4862          | 1            |
| 1NQ89AB    | 4869          | 0            |
| 1NQ89LH    | 485           | 1            |
| 1NQ89LHXXG | 485           | 1            |
| 1NQ89RS    | 4862          | 1            |
| 1NQ89SF    | 4869          | 0            |
| 1NT35HAL7  | 9929          | 3            |
| 1NT50CJ    | 9623          | 1            |
| 1NT52HA    | 4999          | 0            |
| 1NT52LA    | 4901          | 1            |
| 1NT73CJ    | 4994          | 1            |
| 1NT80LA    | 4971          | 1            |
| 1NT87LA    | 4939          | 1            |
| 1NT87URFA  | 4945          | 1            |
| 1NV89DA    | 470           | 0            |
| 1NV89LA    | 4709          | 1            |
| 1OA13DAGX  | 5029          | 2            |
| 1OA13GQGE  | 3886          | 2            |
| 1OA13LA    | 5099          | 0            |
| 1OA13LAXXN | 5061          | 1            |

| CCI       | ICD9CM | GRADE |
|-----------|--------|-------|
| 10A27JA   | 9229   | 0     |
| 10A52DA   | 500    | 1     |
| 10A52HATS | 5091   | 1     |
| 10A52LA   | 5021   | 1     |
| 10A59HAX7 | 5029   | 0     |
| 10A87LA   | 5022   | 1     |
| 10B13GQW0 | 3886   | 2     |
| 10B13LAGX | 4195   | 2     |
| 10B89LA   | 415    | 1     |
| 10D52HA   | 5101   | 1     |
| 10D52HATS | 5103   | 1     |
| 10D52LA   | 5103   | 1     |
| 10D52LATS | 5103   | 1     |
| 10D54HATS | 9641   | 1     |
| 10D55HATS | 9754   | 1     |
| 10D57DA   | 5104   | 2     |
| 10D57LA   | 5104   | 2     |
| 10D89DA   | 5123   | 1     |
| 10D89EC   | 5123   | 2     |
| 10D89LA   | 5122   | 1     |
| 10D89SMGX | 5122   | 2     |
| 10D89TP   | 5122   | 2     |
| 10E13BAE3 | 5179   | 3     |
| 10E27JA   | 9229   | 2     |
| 10E50BA   | 5184   | 1     |
| 10E50BAAG | 5184   | 1     |
| 10E50BABD | 5184   | 1     |
| 10E50BANR | 5187   | 1     |
| 10E50HANR | 5198   | 1     |
| 10E50LANR | 5199   | 1     |
| 10E52BATS | 5186   | 1     |
| 10E52GPTS | 5199   | 1     |
| 10E52LATS | 5143   | 1     |
| 10E53HAEM | 5159   | 3     |
| 10E54BATS | 5119   | 0     |
| 10E54HATS | 9641   | 1     |
| 10E54JANR | 9641   | 1     |
| 10E55BANR | 9755   | 1     |
| 10E55BATS | 9755   | 1     |
| 10E55HATS | 9755   | 1     |
| 10E57BAAM | 5188   | 1     |
| 10E57BABD | 5188   | 1     |
| 10E57BAGX | 5188   | 1     |

| CCI       | ICD9CM | GRADE |
|-----------|--------|-------|
| 1OE57DAAM | 5188   | 1     |
| 1OE59BAAG | 5149   | 2     |
| 1OE59BAAS | 5188   | 2     |
| 1OE59BAAZ | 9852   | 0     |
| 1OE59KQAS | 9852   | 1     |
| 1OE76SR   | 5136   | 1     |
| 1OE80LA   | 5171   | 1     |
| 1OE87BA   | 5164   | 0     |
| 1OJ13LA   | 5295   | 0     |
| 1OJ87LA   | 5259   | 0     |
| 1OT13LA   | 5419   | 0     |
| 1OT13LANP | 5419   | 2     |
| 1OT35HHT9 | 5497   | 1     |
| 1OT52CQ   | 5491   | 1     |
| 1OT52DA   | 5419   | 2     |
| 1OT52DATS | 5419   | 2     |
| 1OT52HA   | 5491   | 1     |
| 1OT52HATS | 5491   | 3     |
| 1OT52HHD2 | 5491   | 1     |
| 1OT52HHD3 | 5491   | 1     |
| 1OT52LA   | 5419   | 1     |
| 1OT52LATS | 540    | 2     |
| 1OT53DATS | 5493   | 1     |
| 1OT53HATS | 5493   | 1     |
| 1OT53LATS | 5493   | 1     |
| 1OT54JATS | 9782   | 1     |
| 1OT55JATS | 9782   | 1     |
| 1OT55LANP | 5412   | 1     |
| 1OT56LA   | 5492   | 1     |
| 1OT72DA   | 5451   | 1     |
| 1OT72LA   | 5459   | 1     |
| 1OT80LA   | 5473   | 2     |
| 1OT87DA   | 544    | 1     |
| 1OT87LA   | 544    | 1     |
| 1OW38JAGJ | 9759   | 2     |
| 1OW50CABP | 9624   | 1     |
| 1OW73CJ   | 9628   | 0     |
| 1OW80LA   | 4643   | 2     |
| 1OZ17CDT4 | 9635   | 1     |
| 1OZ17CET4 | 9635   | 1     |
| 1OZ17CFT4 | 9635   | 1     |
| 1OZ17HHT4 | 966    | 1     |
| 1OZ35CAA2 | 9999   | 3     |

| CCI       | ICD9CM | GRADE |
|-----------|--------|-------|
| 1OZ35CAT9 | 9643   | 1     |
| 1PC52DA   | 5501   | 1     |
| 1PC52HA   | 5592   | 1     |
| 1PC89LB   | 5551   | 1     |
| 1PC91LB   | 5551   | 2     |
| 1PC91QF   | 5551   | 1     |
| 1PE50BABD | 5502   | 0     |
| 1PE50BABJ | 5511   | 2     |
| 1PE50DABJ | 5511   | 2     |
| 1PE52HH   | 5512   | 1     |
| 1PE54DANR | 9646   | 2     |
| 1PE54JATS | 9645   | 1     |
| 1PE55BANR | 9762   | 2     |
| 1PE55CANR | 9762   | 1     |
| 1PE55DANR | 9762   | 2     |
| 1PE55JATS | 9761   | 1     |
| 1PE55LANR | 5511   | 0     |
| 1PE59DAGX | 5539   | 1     |
| 1PE59KQAP | 9851   | 2     |
| 1PE59KQAQ | 9851   | 2     |
| 1PG50BABD | 598    | 1     |
| 1PG50BABJ | 598    | 1     |
| 1PG50BAGX | 598    | 1     |
| 1PG50DABJ | 598    | 1     |
| 1PG54JATS | 9646   | 1     |
| 1PG55JATS | 9762   | 1     |
| 1PG57BAAM | 560    | 1     |
| 1PG57BAGX | 560    | 1     |
| 1PG59BAAG | 560    | 2     |
| 1PG59BAAS | 560    | 2     |
| 1PG59BAAZ | 560    | 2     |
| 1PG59BAGX | 560    | 2     |
| 1PG59DAGX | 562    | 2     |
| 1PG59KQAQ | 9851   | 2     |
| 1PG72LA   | 5902   | 2     |
| 1PL50BABD | 5792   | 1     |
| 1PL50BABJ | 5792   | 1     |
| 1PL50BAGX | 5792   | 1     |
| 1PL50CRBD | 5792   | 1     |
| 1PL72BA   | 5785   | 0     |
| 1PL72LA   | 5899   | 2     |
| 1PL72LAAG | 5785   | 0     |
| 1PL87BA   | 5749   | 2     |

| <b>CCI</b> | <b>ICD9CM</b> | <b>GRADE</b> |
|------------|---------------|--------------|
| 1PM13BAAG  | 5793          | 0            |
| 1PM13BAGX  | 5793          | 1            |
| 1PM13BAZ9  | 5793          | 1            |
| 1PM13LAGX  | 5793          | 1            |
| 1PM27JA    | 9229          | 2            |
| 1PM27JADC  | 9229          | 0            |
| 1PM27JADE  | 9229          | 0            |
| 1PM35BAM7  | 9925          | 1            |
| 1PM35BAT9  | 9649          | 2            |
| 1PM35BAZ9  | 9649          | 2            |
| 1PM35CAD1  | 9922          | 0            |
| 1PM35CAD2  | 9649          | 2            |
| 1PM35CAD3  | 9649          | 2            |
| 1PM35CAM4  | 9925          | 1            |
| 1PM35CAM7  | 9929          | 0            |
| 1PM35CAT9  | 9649          | 2            |
| 1PM35CAZ9  | 9649          | 2            |
| 1PM35HHZ9  | 9929          | 2            |
| 1PM50BAD2  | 9625          | 1            |
| 1PM52BATS  | 5794          | 2            |
| 1PM52BT    | 5719          | 1            |
| 1PM52CATS  | 5794          | 1            |
| 1PM52HA    | 5717          | 0            |
| 1PM52HHTS  | 5718          | 1            |
| 1PM52JA    | 570           | 2            |
| 1PM52LATS  | 5719          | 1            |
| 1PM54CATS  | 9648          | 1            |
| 1PM54HHTS  | 9647          | 1            |
| 1PM55CATS  | 9764          | 1            |
| 1PM55HHTS  | 9764          | 1            |
| 1PM56BA    | 570           | 1            |
| 1PM57BAGX  | 570           | 1            |
| 1PM57CAD3  | 570           | 2            |
| 1PM57DAGX  | 5717          | 2            |
| 1PM57LAGX  | 5719          | 2            |
| 1PM59BAAG  | 5749          | 1            |
| 1PM59BAAS  | 570           | 2            |
| 1PM59BAAZ  | 570           | 2            |
| 1PM59BAGX  | 570           | 2            |
| 1PM77LA    | 5661          | 1            |
| 1PM80LA    | 5781          | 2            |
| 1PM87BA    | 5749          | 1            |
| 1PM87LA    | 576           | 1            |

| <b>CCI</b> | <b>ICD9CM</b> | <b>GRADE</b> |
|------------|---------------|--------------|
| 1PM92LAXXG | 5771          | 2            |
| 1PQ50BA    | 586           | 1            |
| 1PQ50BABD  | 586           | 1            |
| 1PQ50BABJ  | 586           | 1            |
| 1PQ50BABP  | 586           | 1            |
| 1PQ50BTBP  | 581           | 1            |
| 1PQ50CA    | 586           | 1            |
| 1PQ50CABD  | 586           | 1            |
| 1PQ50CABJ  | 586           | 1            |
| 1PQ50CABP  | 586           | 1            |
| 1PQ52CA    | 580           | 2            |
| 1PQ55BABJ  | 9765          | 2            |
| 1PQ55CABJ  | 9765          | 1            |
| 1PQ56BA    | 9819          | 1            |
| 1PQ56CA    | 9819          | 1            |
| 1PQ59BAGX  | 5831          | 2            |
| 1PQ72LA    | 585           | 1            |
| 1PQ80BA    | 5849          | 1            |
| 1PQ80LA    | 5849          | 2            |
| 1PQ87BA    | 5831          | 1            |
| 1PQ87QU    | 5839          | 0            |
| 1PV50BABJ  | 5999          | 2            |
| 1PV50HABP  | 5512          | 0            |
| 1PV52HH    | 5512          | 0            |
| 1PZ21HPD4  | 5498          | 1            |
| 1PZ21HQBR  | 3995          | 1            |
| 1PZ21HQBS  | 3995          | 1            |
| 1PZ37JAGJ  | 5794          | 1            |
| 1QD72LA    | 6491          | 1            |
| 1QD73JH    | 6498          | 2            |
| 1QD89LA    | 640           | 1            |
| 1QE14JAFJ  | 9357          | 2            |
| 1QE14JAGN  | 9357          | 2            |
| 1QE59JAGX  | 642           | 1            |
| 1QE72LA    | 6493          | 1            |
| 1QE80LA    | 6441          | 1            |
| 1QE84LAXXE | 6444          | 1            |
| 1QE87LA    | 642           | 1            |
| 1QG52HA    | 610           | 2            |
| 1QG52LA    | 610           | 1            |
| 1QG59LAGX  | 613           | 1            |
| 1QG80LA    | 6141          | 1            |
| 1QG87LA    | 613           | 1            |

| CCI        | ICD9CM | GRADE |
|------------|--------|-------|
| 1QG89LA    | 613    | 0     |
| 1QH52LA    | 610    | 1     |
| 1QM89LA    | 623    | 1     |
| 1QM89WJ    | 623    | 1     |
| 1QT13BAGX  | 6094   | 1     |
| 1QT27JA    | 9229   | 0     |
| 1QT50BTGX  | 6095   | 0     |
| 1QT57BAAM  | 600    | 1     |
| 1QT59BAAG  | 6029   | 1     |
| 1QT59BAAZ  | 6029   | 1     |
| 1QT59BAGX  | 6029   | 1     |
| 1QT59JAAQ  | 6029   | 2     |
| 1QT87BA    | 6029   | 1     |
| 1QT87BAAG  | 6021   | 1     |
| 1QT87BAAK  | 6029   | 1     |
| 1QT87BAGX  | 6069   | 0     |
| 1RB52HA    | 6591   | 1     |
| 1RB89LA    | 6539   | 1     |
| 1RD89DA    | 6561   | 0     |
| 1RD89LA    | 6561   | 1     |
| 1RM27JA    | 9229   | 2     |
| 1RM53CABH  | 697    | 1     |
| 1RM55CABH  | 9771   | 1     |
| 1RM73CACD  | 6923   | 2     |
| 1RM87CAAE  | 6909   | 1     |
| 1RM89LA    | 684    | 1     |
| 1RM91LA    | 686    | 0     |
| 1RN87CRGX  | 6739   | 1     |
| 1RS27JA    | 9229   | 2     |
| 1RS52PB    | 7012   | 1     |
| 1RS53CANU  | 9618   | 1     |
| 1RS55CANU  | 9774   | 1     |
| 1RS74LA    | 7077   | 0     |
| 1RW52LA    | 7123   | 1     |
| 1RW72LAGX  | 7101   | 1     |
| 1RW87LA    | 7161   | 1     |
| 1RW91LAXXF | 715    | 0     |
| 1RY12JADU  | 9983   | 0     |
| 1RY14JAXXN | 8667   | 2     |
| 1RY87LA    | 713    | 0     |
| 1SA03HAKC  | 0294   | 1     |
| 1SA03JAEQ  | 9352   | 1     |
| 1SA74PFNW  | 8101   | 0     |



| CCI        | ICD9CM | GRADE |
|------------|--------|-------|
| 1SC03HAKC  | 0294   | 2     |
| 1SC03JAEQ  | 9344   | 0     |
| 1SC03JASR  | 9354   | 2     |
| 1SC03JZKC  | 0294   | 2     |
| 1SC27JA    | 9229   | 2     |
| 1SC27JADB  | 9229   | 0     |
| 1SC27JADE  | 9229   | 0     |
| 1SC35HAJ2  | 9923   | 2     |
| 1SC35HAP1  | 9929   | 2     |
| 1SC35HAT9  | 9929   | 3     |
| 1SC74LLNW  | 7859   | 2     |
| 1SC74PFNW  | 7859   | 2     |
| 1SC75LLNWA | 8100   | 2     |
| 1SC75LLNWK | 8100   | 2     |
| 1SC75PFKDN | 8100   | 2     |
| 1SC75PFNWA | 8100   | 2     |
| 1SC75PFNWK | 8100   | 2     |
| 1SC75PFNWN | 8100   | 2     |
| 1SC80HABDN | 0309   | 1     |
| 1SC80HAXXN | 0309   | 1     |
| 1SC80LL    | 0309   | 0     |
| 1SC80PF    | 0309   | 2     |
| 1SC89LLGX  | 7799   | 0     |
| 1SE53LLSL  | 7859   | 0     |
| 1SE89DA    | 8051   | 1     |
| 1SF74HANW  | 7859   | 1     |
| 1SF74LLNW  | 7859   | 1     |
| 1SF87LN    | 7789   | 2     |
| 1SF87PF    | 7789   | 2     |
| 1SF87PFXXE | 7789   | 2     |
| 1SF87PFXXG | 7789   | 0     |
| 1SF89PF    | 7799   | 2     |
| 1SF91LA    | 7799   | 1     |
| 1SG80LAXXN | 8387   | 0     |
| 1SH35JAD2  | 9659   | 2     |
| 1SH52HA    | 8395   | 0     |
| 1SH52LA    | 8302   | 2     |
| 1SH59LA    | 8349   | 2     |
| 1SH87LA    | 8345   | 2     |
| 1SH87LAXXE | 8345   | 2     |
| 1SH87LAXXG | 8345   | 2     |
| 1SI35HAJ2  | 8192   | 2     |
| 1SI74HANW  | 7859   | 2     |

| CCI        | ICD9CM | GRADE |
|------------|--------|-------|
| 1SI74PFNW  | 7859   | 2     |
| 1SK55LAKD  | 7861   | 1     |
| 1SK74LAKD  | 7851   | 1     |
| 1SK80LAKD  | 7841   | 1     |
| 1SK80LANW  | 7841   | 1     |
| 1SL74LLNW  | 7851   | 0     |
| 1SL74PFNW  | 7851   | 0     |
| 1SL80LL    | 7841   | 2     |
| 1SL91LL    | 7791   | 2     |
| 1SM03JASR  | 9354   | 2     |
| 1SM55LALQ  | 7860   | 0     |
| 1SM73JA    | 7909   | 1     |
| 1SM74LANW  | 7939   | 1     |
| 1SN74LANWA | 7939   | 2     |
| 1SQ03HAKC  | 7819   | 1     |
| 1SQ03JZSQ  | 9344   | 2     |
| 1SQ27JA    | 9229   | 2     |
| 1SQ35LAK8  | 9659   | 2     |
| 1SQ38HAKC  | 9788   | 2     |
| 1SQ52HA    | 7719   | 2     |
| 1SQ53LAPM  | 8152   | 1     |
| 1SQ53LAPMA | 8152   | 1     |
| 1SQ53LAPMK | 8152   | 1     |
| 1SQ53LAPMN | 8152   | 1     |
| 1SQ53LAPMQ | 8152   | 1     |
| 1SQ53LAPN  | 8152   | 2     |
| 1SQ53LAPNA | 8152   | 2     |
| 1SQ53LAPNK | 8152   | 1     |
| 1SQ53LAPNN | 8152   | 2     |
| 1SQ53LAPNQ | 8152   | 2     |
| 1SQ55LAKD  | 7869   | 1     |
| 1SQ55LANV  | 7869   | 1     |
| 1SQ55LANW  | 7869   | 1     |
| 1SQ55LAPM  | 8005   | 1     |
| 1SQ55LAPMN | 8005   | 1     |
| 1SQ58LAXXA | 7779   | 1     |
| 1SQ58LAXXF | 7779   | 1     |
| 1SQ73JA    | 7909   | 1     |
| 1SQ73LA    | 7929   | 1     |
| 1SQ74LAKD  | 7939   | 2     |
| 1SQ74LANV  | 7939   | 2     |
| 1SQ74LANVA | 7859   | 0     |
| 1SQ74LANW  | 7939   | 2     |

| CCI        | ICD9CM | GRADE |
|------------|--------|-------|
| 1SQ74LANWA | 7939   | 2     |
| 1SQ80LA    | 7739   | 2     |
| 1SQ80LANWA | 7739   | 2     |
| 1SQ80LAXXA | 7739   | 2     |
| 1SQ87LA    | 7789   | 1     |
| 1SQ87LANV  | 7789   | 0     |
| 1SQ87LANW  | 7789   | 0     |
| 1SQ87LAPM  | 7789   | 0     |
| 1SQ87LAPMG | 7789   | 0     |
| 1SQ87LAPMQ | 7789   | 0     |
| 1SQ87LAXXN | 7789   | 2     |
| 1SQ91LA    | 7789   | 2     |
| 1SQ91LAPM  | 7799   | 0     |
| 1SQ91LAPMN | 7799   | 0     |
| 1SY02YL    | 9312   | 0     |
| 1SY55DAXXN | 540    | 2     |
| 1SY55LAFT  | 540    | 2     |
| 1SY55LAXXN | 540    | 2     |
| 1SY80DAXXL | 5472   | 2     |
| 1SY80DAXXN | 5472   | 2     |
| 1SY80LA    | 5472   | 2     |
| 1SY80LAFF  | 5472   | 2     |
| 1SY80LATZ  | 5472   | 2     |
| 1SY80LAXXN | 5472   | 2     |
| 1SZ27JADE  | 9229   | 0     |
| 1SZ52HA    | 8395   | 2     |
| 1SZ52HATS  | 8395   | 2     |
| 1SZ52LA    | 8309   | 2     |
| 1SZ59LA    | 8349   | 2     |
| 1SZ87LA    | 543    | 2     |
| 1SZ87LAXXE | 543    | 2     |
| 1TA02YD    | 9319   | 0     |
| 1TA02YK    | 9317   | 0     |
| 1TA02YN    | 9312   | 0     |
| 1TA03JAEQ  | 9356   | 1     |
| 1TA03JAFG  | 9356   | 1     |
| 1TA03JAFQ  | 9353   | 1     |
| 1TA03JASQ  | 9356   | 1     |
| 1TA03JASR  | 9351   | 1     |
| 1TA04JH    | 9316   | 1     |
| 1TA05JH    | 9329   | 2     |
| 1TA35HAJ2  | 8192   | 2     |
| 1TA35HAN1  | 8192   | 2     |

| CCI        | ICD9CM | GRADE |
|------------|--------|-------|
| 1TA35HAP1  | 8192   | 1     |
| 1TA35HAT9  | 8192   | 2     |
| 1TA35LAK8  | 8011   | 3     |
| 1TA52DA    | 8303   | 1     |
| 1TA52HA    | 8191   | 1     |
| 1TA52WJ    | 835    | 1     |
| 1TA53LAPM  | 8181   | 1     |
| 1TA53LAPMA | 8181   | 1     |
| 1TA53LAPMN | 8181   | 1     |
| 1TA53LAPMQ | 8181   | 1     |
| 1TA53LAPN  | 8180   | 1     |
| 1TA53LAPNA | 8180   | 1     |
| 1TA53LAPNN | 8180   | 1     |
| 1TA53LAPNQ | 8180   | 1     |
| 1TA53LAPQN | 8180   | 0     |
| 1TA53LASLN | 8183   | 0     |
| 1TA55LAKD  | 7861   | 2     |
| 1TA55LANW  | 7861   | 2     |
| 1TA72LA    | 8041   | 1     |
| 1TA73JA    | 7971   | 1     |
| 1TA73LA    | 7981   | 1     |
| 1TA74DANW  | 7852   | 2     |
| 1TA74HAKD  | 7852   | 2     |
| 1TA74HALQ  | 7852   | 2     |
| 1TA74HANV  | 7852   | 2     |
| 1TA74LAKD  | 7931   | 2     |
| 1TA74LAKDA | 7931   | 2     |
| 1TA74LALQ  | 7931   | 2     |
| 1TA74LALQN | 7931   | 2     |
| 1TA74LANV  | 7931   | 2     |
| 1TA74LANW  | 7931   | 2     |
| 1TA74LANWA | 7931   | 2     |
| 1TA74LANWK | 7931   | 2     |
| 1TA74LANWN | 7931   | 2     |
| 1TA74LANWQ | 7931   | 2     |
| 1TA80LA    | 8193   | 2     |
| 1TA80LAXXQ | 8183   | 2     |
| 1TA87DA    | 8091   | 2     |
| 1TB52HA    | 8191   | 1     |
| 1TB52WJ    | 835    | 2     |
| 1TB80LA    | 8193   | 1     |
| 1TB87LA    | 7781   | 2     |
| 1TC80LA    | 8363   | 1     |

| <b>CCI</b> | <b>ICD9CM</b> | <b>GRADE</b> |
|------------|---------------|--------------|
| 1TC80LAFH  | 8363          | 1            |
| 1TC80LAXXA | 8363          | 2            |
| 1TC80LAXXN | 8363          | 1            |
| 1TC80WU    | 8363          | 1            |
| 1TC80WUNW  | 8363          | 1            |
| 1TC80WUNWE | 8363          | 1            |
| 1TF72WK    | 8319          | 1            |
| 1TF80LA    | 8365          | 1            |
| 1TH72LA    | 8313          | 1            |
| 1TH80LA    | 8364          | 2            |
| 1TH80WU    | 8388          | 2            |
| 1TH80WUNWE | 8375          | 2            |
| 1TK03JAEQ  | 9353          | 1            |
| 1TK03JAFQ  | 9351          | 1            |
| 1TK03JASQ  | 9359          | 1            |
| 1TK03JASR  | 9354          | 1            |
| 1TK35LAK8  | 7712          | 3            |
| 1TK38HAKC  | 9788          | 2            |
| 1TK38JASQ  | 9788          | 1            |
| 1TK55LAKD  | 7862          | 1            |
| 1TK55LANV  | 7862          | 1            |
| 1TK55LANW  | 7862          | 1            |
| 1TK58LAXXK | 7772          | 3            |
| 1TK73JA    | 7901          | 1            |
| 1TK73LA    | 7921          | 1            |
| 1TK74HAKD  | 7852          | 1            |
| 1TK74HALQ  | 7852          | 1            |
| 1TK74HANV  | 7852          | 1            |
| 1TK74HANW  | 7852          | 1            |
| 1TK74LA    | 7822          | 1            |
| 1TK74LAKD  | 7931          | 1            |
| 1TK74LAKDA | 7931          | 2            |
| 1TK74LAKDN | 7931          | 2            |
| 1TK74LALQ  | 7931          | 1            |
| 1TK74LALQA | 7931          | 2            |
| 1TK74LANV  | 7931          | 1            |
| 1TK74LANVK | 7931          | 2            |
| 1TK74LANW  | 7931          | 2            |
| 1TK74LANWA | 7931          | 2            |
| 1TK74LANWK | 7931          | 2            |
| 1TK74LANWN | 7931          | 2            |
| 1TK74LANWQ | 7931          | 2            |
| 1TK87LA    | 7782          | 1            |

| CCI        | ICD9CM | GRADE |
|------------|--------|-------|
| 1TK87LANWN | 7782   | 2     |
| 1TK93LA    | 8407   | 1     |
| 1TM02YD    | 9319   | 0     |
| 1TM02YK    | 9317   | 0     |
| 1TM03HAKC  | 7812   | 1     |
| 1TM03JAFG  | 9356   | 1     |
| 1TM03JAFQ  | 9353   | 1     |
| 1TM03JASQ  | 9359   | 2     |
| 1TM03JASR  | 9354   | 1     |
| 1TM05JH    | 9329   | 2     |
| 1TM35HAJ2  | 8192   | 2     |
| 1TM35HAP1  | 8192   | 1     |
| 1TM35LAK8  | 8012   | 3     |
| 1TM38HAKC  | 9788   | 2     |
| 1TM38JAEQ  | 9788   | 1     |
| 1TM52HA    | 8191   | 1     |
| 1TM52WJ    | 835    | 1     |
| 1TM52WK    | 8012   | 2     |
| 1TM53LAPM  | 8184   | 2     |
| 1TM53LAPMN | 8185   | 0     |
| 1TM53LAPN  | 8184   | 1     |
| 1TM53LAPNN | 8184   | 1     |
| 1TM53LAPNQ | 8184   | 1     |
| 1TM55JAGX  | 9789   | 2     |
| 1TM55LAK8  | 8012   | 0     |
| 1TM55LAKD  | 7862   | 1     |
| 1TM55LANW  | 7862   | 1     |
| 1TM57LA    | 8022   | 0     |
| 1TM72LA    | 8042   | 1     |
| 1TM73JA    | 7972   | 1     |
| 1TM73LA    | 7982   | 1     |
| 1TM74HAKD  | 7852   | 2     |
| 1TM74HANV  | 7852   | 2     |
| 1TM74HANW  | 7852   | 2     |
| 1TM74LAKD  | 7931   | 2     |
| 1TM74LAKDA | 7931   | 2     |
| 1TM74LAKDK | 7931   | 2     |
| 1TM74LAKDN | 7931   | 2     |
| 1TM74LALQ  | 7931   | 2     |
| 1TM74LANV  | 7931   | 2     |
| 1TM74LANW  | 7931   | 2     |
| 1TM74LANWA | 7931   | 2     |
| 1TM74LANWN | 7931   | 2     |

| CCI        | ICD9CM | GRADE |
|------------|--------|-------|
| 1TM80LA    | 8193   | 1     |
| 1TM80LAXXE | 8185   | 2     |
| 1TM87LA    | 8092   | 1     |
| 1TQ58LAXXF | 8343   | 1     |
| 1TQ72WK    | 8319   | 1     |
| 1TQ80LA    | 8365   | 1     |
| 1TS80LA    | 8364   | 1     |
| 1TS80WU    | 8388   | 1     |
| 1TS80WUNWE | 8388   | 1     |
| 1TV03HAKC  | 7813   | 1     |
| 1TV03HATA  | 9344   | 1     |
| 1TV03JAFQ  | 9353   | 1     |
| 1TV03JASQ  | 9359   | 1     |
| 1TV03JASR  | 9354   | 1     |
| 1TV38HAKC  | 9788   | 2     |
| 1TV38JAFQ  | 9788   | 1     |
| 1TV52HA    | 7713   | 2     |
| 1TV55LAKD  | 7863   | 1     |
| 1TV55LANV  | 7863   | 1     |
| 1TV55LANW  | 7863   | 1     |
| 1TV73JA    | 7902   | 1     |
| 1TV73LA    | 7922   | 1     |
| 1TV74HAKD  | 7853   | 1     |
| 1TV74HANV  | 7853   | 1     |
| 1TV74HANW  | 7853   | 1     |
| 1TV74LA    | 7932   | 1     |
| 1TV74LAKD  | 7932   | 1     |
| 1TV74LAKDA | 7853   | 0     |
| 1TV74LALQ  | 7932   | 1     |
| 1TV74LANV  | 7932   | 1     |
| 1TV74LANVN | 7932   | 1     |
| 1TV74LANW  | 7932   | 1     |
| 1TV74LANWA | 7932   | 1     |
| 1TV74LANWK | 7932   | 1     |
| 1TV74LANWN | 7932   | 1     |
| 1TV74LANWQ | 7932   | 1     |
| 1TV80LA    | 7733   | 3     |
| 1TV80LANW  | 7733   | 2     |
| 1TV80LANWA | 7733   | 2     |
| 1TV87LA    | 7783   | 1     |
| 1TX35HAJ2  | 9923   | 2     |
| 1TX35JAD1  | 9659   | 2     |
| 1TX35JAT9  | 9659   | 1     |

| CCI        | ICD9CM | GRADE |
|------------|--------|-------|
| 1TX52HATS  | 8395   | 2     |
| 1TX52LA    | 8309   | 1     |
| 1TX59LA    | 843    | 2     |
| 1TX59LAGX  | 843    | 2     |
| 1TX87LA    | 8345   | 1     |
| 1TX87LAXXE | 8345   | 2     |
| 1TZ02YD    | 9319   | 0     |
| 1TZ02YK    | 9317   | 0     |
| 1TZ27JA    | 9229   | 2     |
| 1UB02YK    | 9317   | 0     |
| 1UB03HAKC  | 7813   | 1     |
| 1UB03JAFG  | 9356   | 1     |
| 1UB03JAFQ  | 9353   | 1     |
| 1UB03JASR  | 9354   | 1     |
| 1UB03JATA  | 9346   | 1     |
| 1UB05JH    | 9329   | 2     |
| 1UB35HAJ2  | 8398   | 2     |
| 1UB35HAP2  | 8192   | 1     |
| 1UB38JAFQ  | 9788   | 1     |
| 1UB52HA    | 8191   | 1     |
| 1UB52WK    | 8303   | 1     |
| 1UB53LAPMN | 8174   | 0     |
| 1UB53LAPN  | 8174   | 0     |
| 1UB55JAGX  | 9789   | 2     |
| 1UB55LAKD  | 7863   | 1     |
| 1UB55LANV  | 7863   | 1     |
| 1UB72LA    | 8043   | 1     |
| 1UB73JA    | 7973   | 1     |
| 1UB73LA    | 7983   | 1     |
| 1UB74DANV  | 7853   | 2     |
| 1UB74HAKD  | 7853   | 2     |
| 1UB74HAKDN | 7853   | 2     |
| 1UB74HANV  | 7853   | 2     |
| 1UB74HANW  | 7853   | 2     |
| 1UB74LAKD  | 7853   | 2     |
| 1UB74LANV  | 7853   | 2     |
| 1UB74LANW  | 7853   | 2     |
| 1UB74LANWA | 7853   | 2     |
| 1UB74LANWN | 7853   | 2     |
| 1UB80DA    | 8193   | 1     |
| 1UB80LA    | 8193   | 2     |
| 1UC73JA    | 7973   | 1     |
| 1UC73LA    | 7983   | 1     |



| CCI        | ICD9CM | GRADE |
|------------|--------|-------|
| 1UC74HAKD  | 7854   | 1     |
| 1UC74HANV  | 7854   | 1     |
| 1UC74LAKD  | 7933   | 1     |
| 1UC74LANV  | 7933   | 1     |
| 1UC74LANW  | 7933   | 1     |
| 1UC74LANWN | 7933   | 1     |
| 1UC80LA    | 8196   | 0     |
| 1UC87DA    | 8093   | 2     |
| 1UE73JA    | 7903   | 2     |
| 1UE74HAKD  | 7854   | 2     |
| 1UF55HAKD  | 7864   | 1     |
| 1UF55LANV  | 7864   | 1     |
| 1UF73JA    | 7903   | 1     |
| 1UF74HAKD  | 7854   | 1     |
| 1UF74LAKD  | 7933   | 1     |
| 1UF74LANV  | 7933   | 1     |
| 1UF74LANW  | 7933   | 1     |
| 1UF80LAKDA | 7734   | 2     |
| 1UF93LA    | 8403   | 1     |
| 1UF93LAXXE | 8403   | 0     |
| 1UG52HA    | 8292   | 1     |
| 1UG73JA    | 7974   | 1     |
| 1UG80LA    | 8172   | 2     |
| 1UI03JASR  | 9354   | 2     |
| 1UI73JA    | 7904   | 2     |
| 1UJ03JAFG  | 9356   | 1     |
| 1UJ03JAFQ  | 9353   | 1     |
| 1UJ03JASR  | 9354   | 1     |
| 1UJ73JA    | 7904   | 1     |
| 1UJ74HAKD  | 7859   | 1     |
| 1UJ74HANV  | 7934   | 1     |
| 1UJ74LAKD  | 7934   | 1     |
| 1UJ74LANW  | 7934   | 1     |
| 1UJ93LA    | 8401   | 1     |
| 1UJ93LAXXE | 8401   | 1     |
| 1UK52WK    | 8203   | 1     |
| 1UK73JA    | 7909   | 1     |
| 1UK74HAKD  | 7859   | 1     |
| 1UK74LANV  | 7859   | 2     |
| 1UK74LANW  | 7934   | 0     |
| 1UK80LA    | 8172   | 2     |
| 1UK93LA    | 8401   | 1     |
| 1UL02YK    | 9317   | 0     |

| CCI        | ICD9CM | GRADE |
|------------|--------|-------|
| 1UL03JAFQ  | 9353   | 1     |
| 1UL03JASR  | 9354   | 1     |
| 1UL35HAT9  | 8192   | 1     |
| 1UM73JA    | 7909   | 2     |
| 1UM74LAKD  | 7859   | 2     |
| 1UM93LA    | 8401   | 2     |
| 1US80LA    | 8245   | 2     |
| 1US80LAXXE | 8256   | 2     |
| 1UT72HAT9  | 8295   | 1     |
| 1UT72LA    | 8211   | 1     |
| 1UU80LA    | 8245   | 1     |
| 1UU80LAXXE | 8375   | 0     |
| 1UV72LA    | 8211   | 1     |
| 1UV80LA    | 8245   | 2     |
| 1UV80LAXXE | 8256   | 2     |
| 1UV80WU    | 8285   | 1     |
| 1UY35HAJ2  | 9929   | 0     |
| 1UY52HA    | 8293   | 1     |
| 1UY52LA    | 8209   | 2     |
| 1UY56JA    | 9826   | 1     |
| 1UY59LAGX  | 8229   | 2     |
| 1UY72WK    | 8212   | 2     |
| 1UY80LA    | 8246   | 2     |
| 1UY80LAXXA | 8272   | 2     |
| 1UZ02YK    | 9317   | 0     |
| 1VA02YD    | 9319   | 1     |
| 1VA02YH    | 9312   | 0     |
| 1VA02YJ    | 9312   | 0     |
| 1VA02YK    | 9312   | 0     |
| 1VA02YN    | 9312   | 0     |
| 1VA03HAFQ  | 9344   | 2     |
| 1VA03HAKC  | 7815   | 1     |
| 1VA03HASR  | 7975   | 0     |
| 1VA03HATA  | 9344   | 2     |
| 1VA03JAEQ  | 9356   | 1     |
| 1VA03JAFQ  | 9353   | 1     |
| 1VA03JASQ  | 9359   | 2     |
| 1VA03JASR  | 9354   | 1     |
| 1VA03JZSR  | 9354   | 1     |
| 1VA03JZTA  | 9346   | 1     |
| 1VA04JH    | 9316   | 1     |
| 1VA05JH    | 9329   | 2     |
| 1VA35DAD1  | 8025   | 2     |

| CCI        | ICD9CM | GRADE |
|------------|--------|-------|
| 1VA35DAD2  | 8025   | 2     |
| 1VA35DAD3  | 8025   | 2     |
| 1VA35HAJ2  | 8192   | 1     |
| 1VA35HAN1  | 8192   | 1     |
| 1VA35HAP1  | 8192   | 1     |
| 1VA35HAP2  | 8192   | 1     |
| 1VA35HAT9  | 8192   | 1     |
| 1VA35LAD3  | 8192   | 0     |
| 1VA35LAK8  | 8192   | 1     |
| 1VA38HAKC  | 9788   | 0     |
| 1VA38HATA  | 9788   | 1     |
| 1VA38JZTA  | 9788   | 0     |
| 1VA52DA    | 8025   | 2     |
| 1VA52HA    | 8191   | 1     |
| 1VA52WJ    | 835    | 1     |
| 1VA52WK    | 8303   | 1     |
| 1VA53LAPM  | 8152   | 1     |
| 1VA53LAPMA | 8152   | 1     |
| 1VA53LAPMK | 8152   | 1     |
| 1VA53LAPMN | 8152   | 1     |
| 1VA53LAPMQ | 8152   | 1     |
| 1VA53LAPN  | 8151   | 1     |
| 1VA53LAPNA | 8151   | 1     |
| 1VA53LAPNK | 8151   | 1     |
| 1VA53LAPNN | 8151   | 1     |
| 1VA53LAPNQ | 8151   | 1     |
| 1VA53LASLN | 8005   | 1     |
| 1VA53PNPM  | 8152   | 1     |
| 1VA53PNPMA | 8152   | 1     |
| 1VA53PNPMN | 8152   | 1     |
| 1VA53PNPMQ | 8152   | 1     |
| 1VA53PNPN  | 8151   | 1     |
| 1VA53PNPNN | 8151   | 1     |
| 1VA55DANW  | 7865   | 1     |
| 1VA55JAGX  | 9789   | 2     |
| 1VA55LAK8  | 7865   | 1     |
| 1VA55LAKD  | 7865   | 1     |
| 1VA55LANV  | 7865   | 2     |
| 1VA55LANW  | 7865   | 2     |
| 1VA55LAPM  | 8005   | 1     |
| 1VA55LAPMN | 8005   | 1     |
| 1VA55LAPN  | 8005   | 1     |
| 1VA55LAPNN | 8005   | 1     |

| CCI        | ICD9CM | GRADE |
|------------|--------|-------|
| 1VA57LA    | 8095   | 0     |
| 1VA72JA    | 8045   | 0     |
| 1VA72LA    | 8045   | 1     |
| 1VA73JA    | 7975   | 1     |
| 1VA73LA    | 7985   | 1     |
| 1VA74DAKD  | 7855   | 2     |
| 1VA74DANV  | 7855   | 2     |
| 1VA74DANW  | 7855   | 2     |
| 1VA74HAKD  | 7855   | 2     |
| 1VA74HALQ  | 7855   | 2     |
| 1VA74HANV  | 7855   | 2     |
| 1VA74HANW  | 7855   | 2     |
| 1VA74LAKD  | 7855   | 2     |
| 1VA74LAKDA | 7855   | 2     |
| 1VA74LAKDK | 7855   | 2     |
| 1VA74LAKDN | 7855   | 2     |
| 1VA74LAKDQ | 7855   | 2     |
| 1VA74LALQ  | 7855   | 2     |
| 1VA74LALQA | 7855   | 2     |
| 1VA74LALQK | 7855   | 2     |
| 1VA74LALQN | 7855   | 2     |
| 1VA74LALQQ | 7855   | 2     |
| 1VA74LANV  | 7855   | 2     |
| 1VA74LANVA | 7855   | 2     |
| 1VA74LANVK | 7855   | 2     |
| 1VA74LANVN | 7855   | 2     |
| 1VA74LANVQ | 7855   | 2     |
| 1VA74LANW  | 7855   | 2     |
| 1VA74LANWA | 7855   | 2     |
| 1VA74LANWK | 7855   | 2     |
| 1VA74LANWN | 7855   | 2     |
| 1VA74LANWQ | 7855   | 2     |
| 1VA75LAKCA | 8121   | 0     |
| 1VA75LALQ  | 8121   | 0     |
| 1VA75LANV  | 8121   | 0     |
| 1VA75LANW  | 8121   | 0     |
| 1VA75LANWA | 8121   | 0     |
| 1VA80DA    | 8140   | 0     |
| 1VA80GZ    | 7715   | 1     |
| 1VA80LA    | 8195   | 1     |
| 1VA80LAKDA | 8140   | 2     |
| 1VA80LAKDG | 8140   | 0     |
| 1VA80LAXXA | 8140   | 2     |

| <b>CCI</b> | <b>ICD9CM</b> | <b>GRADE</b> |
|------------|---------------|--------------|
| 1VA80LAXXF | 8140          | 2            |
| 1VA80LAXXK | 8140          | 0            |
| 1VA80WK    | 8140          | 0            |
| 1VA87DA    | 8095          | 1            |
| 1VA87LA    | 8095          | 1            |
| 1VA87WJ    | 8075          | 1            |
| 1VA93LA    | 8140          | 0            |
| 1VC03HAKC  | 7815          | 1            |
| 1VC03HASR  | 9344          | 1            |
| 1VC03HATA  | 9344          | 1            |
| 1VC03JAEQ  | 9353          | 1            |
| 1VC03JAFQ  | 9353          | 1            |
| 1VC03JASR  | 9354          | 1            |
| 1VC03JZFQ  | 9346          | 1            |
| 1VC03JZSR  | 9346          | 1            |
| 1VC03JZTA  | 9346          | 1            |
| 1VC35LAK8  | 7715          | 1            |
| 1VC38HAKC  | 9788          | 2            |
| 1VC38HATA  | 9788          | 1            |
| 1VC52HA    | 7715          | 2            |
| 1VC55LAK8  | 7865          | 1            |
| 1VC55LAKD  | 7865          | 1            |
| 1VC55LALQ  | 7865          | 1            |
| 1VC55LANV  | 7865          | 1            |
| 1VC55LANW  | 7865          | 1            |
| 1VC55LAPM  | 7865          | 1            |
| 1VC56LA    | 7715          | 2            |
| 1VC58LAXXK | 7775          | 3            |
| 1VC73JA    | 7905          | 1            |
| 1VC73LA    | 7925          | 1            |
| 1VC74HALQ  | 7855          | 1            |
| 1VC74HANV  | 7855          | 1            |
| 1VC74HANW  | 7855          | 1            |
| 1VC74LA    | 7825          | 1            |
| 1VC74LAKD  | 7935          | 1            |
| 1VC74LAKDA | 7935          | 1            |
| 1VC74LAKDK | 7935          | 1            |
| 1VC74LAKDN | 7935          | 1            |
| 1VC74LAKDQ | 7935          | 1            |
| 1VC74LALQ  | 7935          | 1            |
| 1VC74LALQA | 7935          | 1            |
| 1VC74LALQK | 7935          | 1            |
| 1VC74LALQN | 7935          | 1            |

| CCI        | ICD9CM | GRADE |
|------------|--------|-------|
| 1VC74LALQQ | 7935   | 1     |
| 1VC74LANV  | 7935   | 1     |
| 1VC74LANVA | 7935   | 1     |
| 1VC74LANVK | 7935   | 1     |
| 1VC74LANVN | 7935   | 1     |
| 1VC74LANVQ | 7935   | 1     |
| 1VC74LANW  | 7935   | 1     |
| 1VC74LANWA | 7935   | 1     |
| 1VC74LANWK | 7935   | 1     |
| 1VC74LANWN | 7935   | 1     |
| 1VC74LANWQ | 7935   | 1     |
| 1VC79LAMG  | 7835   | 0     |
| 1VC80LAKD  | 7735   | 2     |
| 1VC80LAKDA | 7735   | 2     |
| 1VC80LAKDK | 7735   | 2     |
| 1VC80LALQ  | 7735   | 2     |
| 1VC80LANV  | 7735   | 2     |
| 1VC80LANVN | 7845   | 0     |
| 1VC80LANW  | 7735   | 2     |
| 1VC80LANWA | 7735   | 2     |
| 1VC80LANWN | 7735   | 2     |
| 1VC80LANWQ | 7735   | 2     |
| 1VC80LAXXG | 7735   | 2     |
| 1VC80LAXXN | 7735   | 2     |
| 1VC82LA    | 8428   | 1     |
| 1VC83LAXXA | 7805   | 1     |
| 1VC83LAXXK | 7805   | 1     |
| 1VC83LAXXN | 7845   | 2     |
| 1VC83LAXXQ | 7805   | 1     |
| 1VC87LA    | 7785   | 1     |
| 1VC87LAKD  | 7785   | 0     |
| 1VC87LALQ  | 7785   | 1     |
| 1VC87LANV  | 7785   | 1     |
| 1VC87LANW  | 7785   | 0     |
| 1VC87LANWN | 7785   | 1     |
| 1VC87LAPM  | 7785   | 1     |
| 1VC87LAPMA | 7785   | 0     |
| 1VC87LAPMN | 7785   | 0     |
| 1VC87LAXXG | 7785   | 1     |
| 1VC87LAXXK | 7785   | 0     |
| 1VC87LAXXN | 7785   | 1     |
| 1VC91LALQ  | 7785   | 0     |
| 1VC91LANV  | 7795   | 0     |

| CCI        | ICD9CM | GRADE |
|------------|--------|-------|
| 1VC91LAPM  | 7795   | 0     |
| 1VC91LAXXG | 7785   | 2     |
| 1VC93LA    | 8417   | 1     |
| 1VC93LAXXE | 8417   | 1     |
| 1VD04JH    | 9327   | 2     |
| 1VD58LAXXA | 8343   | 1     |
| 1VD58LAXXF | 8343   | 1     |
| 1VD72WJ    | 8344   | 1     |
| 1VD72WK    | 8319   | 1     |
| 1VD80LA    | 8365   | 1     |
| 1VD80LAXXA | 8382   | 1     |
| 1VD80LAXXE | 8387   | 2     |
| 1VD80LAXXN | 8387   | 2     |
| 1VD87LA    | 8345   | 1     |
| 1VE72HA    | 8313   | 1     |
| 1VE72LA    | 8313   | 1     |
| 1VE80LA    | 8364   | 2     |
| 1VE80WU    | 8388   | 2     |
| 1VE80WUNW  | 8388   | 2     |
| 1VE80WUXXE | 8388   | 2     |
| 1VG02YD    | 9319   | 0     |
| 1VG02YK    | 9312   | 0     |
| 1VG03HAKC  | 7815   | 1     |
| 1VG03JAEQ  | 9353   | 1     |
| 1VG03JAFG  | 9359   | 0     |
| 1VG03JAFQ  | 9353   | 1     |
| 1VG03JASR  | 9354   | 1     |
| 1VG05JH    | 9329   | 2     |
| 1VG35HAJ2  | 8192   | 2     |
| 1VG35HAN1  | 8192   | 1     |
| 1VG35HAP1  | 8192   | 1     |
| 1VG35HAT9  | 8192   | 0     |
| 1VG35LAD2  | 9659   | 1     |
| 1VG35LAK8  | 8016   | 3     |
| 1VG52HA    | 8191   | 1     |
| 1VG52WJ    | 835    | 1     |
| 1VG52WK    | 8303   | 1     |
| 1VG53LAPM  | 8154   | 1     |
| 1VG53LAPMA | 8154   | 0     |
| 1VG53LAPMK | 8154   | 0     |
| 1VG53LAPMN | 8154   | 1     |
| 1VG53LAPMQ | 8154   | 0     |
| 1VG53LAPN  | 8154   | 1     |

| CCI        | ICD9CM | GRADE |
|------------|--------|-------|
| 1VG53LAPNA | 8154   | 0     |
| 1VG53LAPNN | 8154   | 0     |
| 1VG53LAPNQ | 8154   | 0     |
| 1VG53LAPP  | 8154   | 1     |
| 1VG53LAPPA | 8154   | 0     |
| 1VG53LAPPN | 8154   | 1     |
| 1VG53LAPPQ | 8154   | 1     |
| 1VG53LASLN | 8006   | 1     |
| 1VG55LAKD  | 7867   | 2     |
| 1VG55LANV  | 7867   | 2     |
| 1VG55LANW  | 7867   | 2     |
| 1VG55LAPMN | 8006   | 1     |
| 1VG55LAPNN | 8006   | 1     |
| 1VG55LAPPN | 8006   | 1     |
| 1VG57LA    | 8096   | 0     |
| 1VG73JA    | 7976   | 1     |
| 1VG73LA    | 7986   | 1     |
| 1VG74HALQ  | 7857   | 2     |
| 1VG74HANV  | 7857   | 2     |
| 1VG74HANW  | 7857   | 1     |
| 1VG74LAKD  | 7857   | 2     |
| 1VG74LALQ  | 7857   | 2     |
| 1VG74LANV  | 7857   | 2     |
| 1VG74LANW  | 7857   | 2     |
| 1VG74LANWA | 7857   | 2     |
| 1VG74LANWK | 7857   | 2     |
| 1VG74LANWN | 7857   | 2     |
| 1VG74LANWQ | 7857   | 2     |
| 1VG80DA    | 8147   | 2     |
| 1VG80FY    | 8147   | 2     |
| 1VG80LA    | 8147   | 2     |
| 1VG87DA    | 8096   | 2     |
| 1VG87LA    | 8096   | 2     |
| 1VG87WJ    | 8076   | 1     |
| 1VG93LA    | 8416   | 1     |
| 1VK80DA    | 8147   | 2     |
| 1VK80LA    | 8147   | 2     |
| 1VK87DA    | 806    | 1     |
| 1VL80LA    | 8145   | 1     |
| 1VP53LAPMN | 8154   | 0     |
| 1VP55LAKD  | 7866   | 1     |
| 1VP73JA    | 7976   | 1     |
| 1VP73LA    | 7936   | 1     |



| CCI        | ICD9CM | GRADE |
|------------|--------|-------|
| 1VP74LAKD  | 7856   | 1     |
| 1VP74LAKDN | 7856   | 1     |
| 1VP74LANW  | 7856   | 1     |
| 1VP80LA    | 7846   | 2     |
| 1VP87LA    | 7786   | 1     |
| 1VQ03HAKC  | 7817   | 1     |
| 1VQ03HATA  | 9344   | 1     |
| 1VQ03JAEQ  | 9359   | 0     |
| 1VQ03JAFQ  | 9353   | 1     |
| 1VQ03JASR  | 9354   | 1     |
| 1VQ03JZTA  | 9346   | 1     |
| 1VQ35LAK8  | 7717   | 3     |
| 1VQ38HAKC  | 9788   | 1     |
| 1VQ38HATA  | 9788   | 1     |
| 1VQ55LAK8  | 8019   | 0     |
| 1VQ55LANV  | 7867   | 1     |
| 1VQ55LANW  | 7867   | 1     |
| 1VQ73JA    | 7906   | 1     |
| 1VQ73LA    | 7926   | 1     |
| 1VQ74HALQ  | 7857   | 1     |
| 1VQ74HANV  | 7857   | 1     |
| 1VQ74HANW  | 7936   | 1     |
| 1VQ74LA    | 7827   | 1     |
| 1VQ74LALQ  | 7936   | 1     |
| 1VQ74LALQA | 7936   | 1     |
| 1VQ74LANV  | 7936   | 1     |
| 1VQ74LANVA | 7936   | 1     |
| 1VQ74LANW  | 7936   | 1     |
| 1VQ74LANWA | 7936   | 1     |
| 1VQ74LANWN | 7936   | 1     |
| 1VQ74LANWQ | 7936   | 1     |
| 1VQ80LANVK | 7737   | 2     |
| 1VQ87LA    | 7787   | 1     |
| 1VQ93LA    | 8415   | 1     |
| 1VQ93LAXXA | 8415   | 1     |
| 1VQ93LAXXE | 8415   | 1     |
| 1VR72WJ    | 8344   | 2     |
| 1VR72WK    | 8319   | 1     |
| 1VR80LA    | 8365   | 1     |
| 1VR80LAXXE | 8387   | 2     |
| 1VR87LA    | 8345   | 1     |
| 1VS72LA    | 8313   | 1     |
| 1VS80LA    | 8364   | 1     |

| CCI        | ICD9CM | GRADE |
|------------|--------|-------|
| 1VS80WU    | 8388   | 2     |
| 1VS80WUNW  | 8388   | 2     |
| 1VS80WUNWE | 8388   | 0     |
| 1VS80WUXXE | 8388   | 2     |
| 1VX13JAC2  | 9359   | 1     |
| 1VX13JN    | 9359   | 1     |
| 1VX27JA    | 9229   | 2     |
| 1VX35HAL7  | 8398   | 3     |
| 1VX35HAP1  | 8398   | 2     |
| 1VX35JAD1  | 9659   | 2     |
| 1VX35JAD2  | 9659   | 2     |
| 1VX35JAD3  | 9659   | 2     |
| 1VX35JAK0  | 9659   | 1     |
| 1VX35JAP2  | 9929   | 0     |
| 1VX35JAT9  | 9659   | 1     |
| 1VX52HA    | 8395   | 1     |
| 1VX52HATS  | 8395   | 2     |
| 1VX52LA    | 8309   | 1     |
| 1VX55JAGX  | 9789   | 2     |
| 1VX55JATS  | 9789   | 1     |
| 1VX56LA    | 8302   | 1     |
| 1VX59LAGX  | 843    | 2     |
| 1VX59LAX7  | 863    | 0     |
| 1VX87LA    | 8349   | 2     |
| 1VX87LAXXA | 8349   | 2     |
| 1VX87LAXXE | 8349   | 2     |
| 1VX87LAXXF | 8349   | 2     |
| 1VZ02YD    | 9319   | 1     |
| 1VZ02YJ    | 9312   | 0     |
| 1VZ02YK    | 9317   | 0     |
| 1VZ02YP    | 9312   | 0     |
| 1VZ27JA    | 9229   | 2     |
| 1VZ70LA    | 8309   | 2     |
| 1WA03HAKC  | 7817   | 2     |
| 1WA03JAFQ  | 9353   | 1     |
| 1WA03JAMM  | 9353   | 2     |
| 1WA03JASR  | 9354   | 1     |
| 1WA03JZTA  | 9346   | 1     |
| 1WA35HAT9  | 9929   | 0     |
| 1WA38HAKC  | 9788   | 2     |
| 1WA38JAFQ  | 9788   | 1     |
| 1WA52HA    | 8191   | 1     |
| 1WA52WJ    | 835    | 1     |

| CCI        | ICD9CM | GRADE |
|------------|--------|-------|
| 1WA52WK    | 8303   | 1     |
| 1WA53LAPN  | 7589   | 0     |
| 1WA55LAKD  | 7867   | 2     |
| 1WA55LANW  | 7867   | 2     |
| 1WA73JA    | 7977   | 1     |
| 1WA73LA    | 7987   | 1     |
| 1WA74HANV  | 7919   | 0     |
| 1WA74HANW  | 7857   | 2     |
| 1WA74LAKD  | 7857   | 2     |
| 1WA74LALQ  | 7929   | 0     |
| 1WA74LANV  | 7929   | 0     |
| 1WA74LANW  | 7857   | 2     |
| 1WA74LANWA | 7857   | 2     |
| 1WA74LANWN | 7857   | 2     |
| 1WA75LANW  | 8111   | 1     |
| 1WA87LA    | 8097   | 1     |
| 1WA93LAXXE | 8413   | 1     |
| 1WB80WU    | 8196   | 2     |
| 1WE73JA    | 7907   | 2     |
| 1WE74HAKD  | 7858   | 2     |
| 1WE74HANV  | 7858   | 2     |
| 1WE74HANW  | 7858   | 2     |
| 1WE74LAKD  | 7937   | 1     |
| 1WE74LAKDA | 7937   | 1     |
| 1WE74LANV  | 7927   | 0     |
| 1WE74LANW  | 7937   | 1     |
| 1WE74LANWQ | 7937   | 1     |
| 1WE80LA    | 7738   | 2     |
| 1WE87LA    | 7788   | 1     |
| 1WE91LA    | 7798   | 0     |
| 1WE91LAXXK | 7798   | 0     |
| 1WG02YD    | 9319   | 0     |
| 1WG02YP    | 9319   | 0     |
| 1WG03JAFG  | 9359   | 1     |
| 1WG03JAFQ  | 9353   | 1     |
| 1WI35HAJ2  | 9929   | 0     |
| 1WI35HAP2  | 8192   | 2     |
| 1WI52HA    | 8191   | 0     |
| 1WI87LA    | 7758   | 0     |
| 1WI93LA    | 8412   | 2     |
| 1WI93LAXXA | 8412   | 2     |
| 1WJ52HA    | 8191   | 1     |
| 1WJ73JA    | 7978   | 1     |

| CCI        | ICD9CM | GRADE |
|------------|--------|-------|
| 1WJ73LA    | 7988   | 1     |
| 1WJ74HAKD  | 7858   | 1     |
| 1WJ74HANV  | 7858   | 1     |
| 1WJ74LAKD  | 7937   | 1     |
| 1WJ74LANW  | 7937   | 1     |
| 1WJ87LA    | 8098   | 1     |
| 1WJ93LA    | 8412   | 1     |
| 1WJ93LAXXE | 8412   | 1     |
| 1WK93LA    | 8411   | 1     |
| 1WL03JAFQ  | 9353   | 1     |
| 1WL93LA    | 8411   | 1     |
| 1WM52HA    | 8191   | 1     |
| 1WM73JA    | 7978   | 1     |
| 1WM80RVKD  | 7758   | 0     |
| 1WM87LA    | 8098   | 1     |
| 1WM93LA    | 8411   | 1     |
| 1WM93LAXXE | 8411   | 1     |
| 1WN52WK    | 8303   | 2     |
| 1WT72LA    | 8313   | 1     |
| 1WT79LAXXE | 8385   | 1     |
| 1WT79WK    | 8385   | 1     |
| 1WT80LA    | 8364   | 1     |
| 1WV35HAJ2  | 9923   | 2     |
| 1WV52LA    | 8302   | 1     |
| 1WV55JAGX  | 9788   | 0     |
| 1WV59LAGX  | 843    | 2     |
| 1WV59LAX7  | 843    | 2     |
| 1WV72WK    | 8314   | 0     |
| 1WV80LA    | 8365   | 1     |
| 1WV87LA    | 8345   | 1     |
| 1WV87LAXXA | 8345   | 1     |
| 1WV87LAXXF | 8349   | 1     |
| 1WX58LAXXK | 7770   | 1     |
| 1WY58HA    | 4191   | 1     |
| 1WZ27JA    | 9229   | 2     |
| 1WZ27JADA  | 9229   | 0     |
| 1WZ27JADC  | 9229   | 0     |
| 1WZ27JADE  | 9229   | 0     |
| 1WZ27JADF  | 9229   | 0     |
| 1WZ94LA    | 8499   | 3     |
| 1YA55JAFF  | 9738   | 1     |
| 1YA80JAFF  | 8659   | 2     |
| 1YA80LA    | 8659   | 1     |

| CCI        | ICD9CM | GRADE |
|------------|--------|-------|
| 1YA80LAW4  | 8659   | 2     |
| 1YA87LA    | 863    | 1     |
| 1YA87LAXXB | 863    | 1     |
| 1YA87LAXXE | 864    | 0     |
| 1YB52HA    | 8601   | 1     |
| 1YB52JA    | 9359   | 1     |
| 1YB55JAFF  | 9738   | 0     |
| 1YB80JAFF  | 8659   | 2     |
| 1YB80LA    | 8659   | 1     |
| 1YB80LAW4  | 8659   | 2     |
| 1YB87LA    | 863    | 1     |
| 1YB87LAXXA | 863    | 1     |
| 1YB87LAXXE | 863    | 1     |
| 1YC59JAGX  | 1829   | 1     |
| 1YC80LA    | 184    | 1     |
| 1YC80LAXXA | 1879   | 1     |
| 1YC80LAXXE | 1879   | 1     |
| 1YC87LA    | 1829   | 1     |
| 1YC87LAXXB | 1829   | 1     |
| 1YC87LAXXE | 1829   | 1     |
| 1YD80LA    | 2181   | 0     |
| 1YD87LA    | 2132   | 1     |
| 1YD87LAXXA | 2132   | 1     |
| 1YD87LAXXE | 2132   | 1     |
| 1YE59JAGX  | 2743   | 1     |
| 1YE87LA    | 2742   | 1     |
| 1YE87LAXXE | 2742   | 1     |
| 1YE87WJ    | 2743   | 1     |
| 1YF27JA    | 9229   | 2     |
| 1YF27JADA  | 9229   | 0     |
| 1YF35JAZ9  | 9999   | 3     |
| 1YF52LA    | 270    | 1     |
| 1YF55JAFF  | 9738   | 0     |
| 1YF58LAXXA | 8691   | 1     |
| 1YF59JAGX  | 863    | 1     |
| 1YF59JAX2  | 863    | 1     |
| 1YF80JAFF  | 8659   | 0     |
| 1YF80LA    | 8659   | 1     |
| 1YF80LAW4  | 8689   | 1     |
| 1YF80LAXXA | 8663   | 1     |
| 1YF80LAXXE | 8674   | 1     |
| 1YF87LA    | 863    | 1     |
| 1YF87LAXXA | 863    | 1     |

| CCI        | ICD9CM | GRADE |
|------------|--------|-------|
| 1YF87LAXXE | 863    | 1     |
| 1YF87LAXXF | 864    | 0     |
| 1YG52LA    | 8604   | 1     |
| 1YG53LATS  | 8604   | 0     |
| 1YG80JAFF  | 8659   | 0     |
| 1YG80LA    | 8659   | 1     |
| 1YG87LA    | 863    | 1     |
| 1YG87LAXXE | 863    | 1     |
| 1YM27JA    | 9229   | 2     |
| 1YM52HA    | 8591   | 1     |
| 1YM52LA    | 850    | 1     |
| 1YM55JATS  | 9749   | 0     |
| 1YM87LA    | 8521   | 1     |
| 1YM89LA    | 8541   | 1     |
| 1YM91LA    | 8545   | 1     |
| 1YM91LAXXE | 8545   | 0     |
| 1YR14JAFN  | 9357   | 0     |
| 1YR14JAT6  | 9357   | 0     |
| 1YS14JAFJ  | 9357   | 1     |
| 1YS14JAFN  | 9357   | 1     |
| 1YS14JAGN  | 9356   | 1     |
| 1YS14JAH1  | 9357   | 1     |
| 1YS14JANCN | 8669   | 2     |
| 1YS14JANP  | 9356   | 1     |
| 1YS14JAT6  | 9357   | 1     |
| 1YS14JAXXN | 8669   | 1     |
| 1YS14JAXXP | 9357   | 0     |
| 1YS35HAP1  | 9929   | 0     |
| 1YS35JAD2  | 9659   | 2     |
| 1YS35JAG3  | 9929   | 0     |
| 1YS52HA    | 8601   | 1     |
| 1YS52HATS  | 8604   | 0     |
| 1YS52JA    | 8604   | 0     |
| 1YS52LA    | 8604   | 1     |
| 1YS53LATS  | 9716   | 2     |
| 1YS55JAFF  | 9784   | 1     |
| 1YS55JATS  | 9787   | 1     |
| 1YS56LA    | 8605   | 1     |
| 1YS58LAXXA | 8691   | 1     |
| 1YS58LAXXB | 8691   | 1     |
| 1YS59JACF  | 8625   | 1     |
| 1YS59JAGX  | 863    | 1     |
| 1YS80JAFF  | 8689   | 1     |

| CCI        | ICD9CM | GRADE |
|------------|--------|-------|
| 1YS80LA    | 8659   | 2     |
| 1YS80LAXXB | 8669   | 2     |
| 1YS80LAXXE | 8674   | 2     |
| 1YS80LAXXF | 8674   | 2     |
| 1YS87LA    | 863    | 1     |
| 1YS87LAXXB | 863    | 1     |
| 1YS87LAXXE | 863    | 1     |
| 1YS87LAXXF | 864    | 0     |
| 1YT14JAGN  | 9356   | 1     |
| 1YT14JAH1  | 9357   | 1     |
| 1YT14JANCN | 9359   | 2     |
| 1YT14JANP  | 9356   | 1     |
| 1YT14JAT6  | 9357   | 1     |
| 1YT14JAXXL | 8667   | 1     |
| 1YT52HA    | 8601   | 1     |
| 1YT52LA    | 8604   | 1     |
| 1YT55JAFF  | 9789   | 1     |
| 1YT58LAXXA | 8691   | 1     |
| 1YT59JAGX  | 863    | 1     |
| 1YT80JAFF  | 8689   | 1     |
| 1YT80LA    | 8659   | 1     |
| 1YT80LAW4  | 8659   | 2     |
| 1YT80LAXXB | 8669   | 1     |
| 1YT80LAXXE | 8674   | 1     |
| 1YT80LAXXG | 8674   | 1     |
| 1YT87LA    | 863    | 1     |
| 1YT87LAXXA | 863    | 1     |
| 1YT87LAXXE | 863    | 1     |
| 1YU14JAH1  | 9357   | 1     |
| 1YU52LA    | 8604   | 1     |
| 1YU59JAGX  | 863    | 1     |
| 1YU80JAFF  | 8689   | 1     |
| 1YU80LA    | 8659   | 1     |
| 1YU80LAW4  | 8659   | 2     |
| 1YU80LAXXA | 8663   | 1     |
| 1YU80LAXXB | 8669   | 1     |
| 1YU80LAXXG | 8674   | 1     |
| 1YU87LA    | 863    | 1     |
| 1YU87LAXXA | 863    | 1     |
| 1YV14JAFJ  | 9357   | 1     |
| 1YV14JAFN  | 9357   | 1     |
| 1YV14JAGN  | 9356   | 1     |
| 1YV14JAH1  | 9357   | 1     |

| <b>CCI</b> | <b>ICD9CM</b> | <b>GRADE</b> |
|------------|---------------|--------------|
| 1YV14JANCN | 9359          | 2            |
| 1YV14JANP  | 9356          | 1            |
| 1YV14JAT6  | 9357          | 1            |
| 1YV14JAXXN | 8669          | 1            |
| 1YV14JAXXP | 9357          | 0            |
| 1YV35HAP1  | 9929          | 3            |
| 1YV35HAT9  | 9929          | 0            |
| 1YV35JAD1  | 9659          | 2            |
| 1YV35JAD3  | 9659          | 2            |
| 1YV35JAG6  | 9999          | 3            |
| 1YV35JAZ9  | 9999          | 3            |
| 1YV52HA    | 8601          | 1            |
| 1YV52HATS  | 8601          | 2            |
| 1YV52LA    | 8604          | 1            |
| 1YV53LATS  | 9716          | 2            |
| 1YV55JAFF  | 9789          | 1            |
| 1YV55JATS  | 9789          | 1            |
| 1YV58LAXXA | 8691          | 1            |
| 1YV58LAXXB | 8691          | 1            |
| 1YV58LAXXF | 8691          | 0            |
| 1YV59JACF  | 8625          | 1            |
| 1YV59JAGX  | 863           | 1            |
| 1YV80JAFF  | 8689          | 1            |
| 1YV80LA    | 8659          | 1            |
| 1YV80LAXXA | 8663          | 1            |
| 1YV80LAXXB | 8669          | 1            |
| 1YV80LAXXE | 8674          | 1            |
| 1YV80LAXXF | 8674          | 1            |
| 1YV87LA    | 863           | 1            |
| 1YV87LAAYB | 863           | 1            |
| 1YV87LAXXA | 863           | 1            |
| 1YV87LAXXE | 863           | 1            |
| 1YW14JAFJ  | 9357          | 1            |
| 1YW14JAFN  | 9357          | 1            |
| 1YW14JAGN  | 9356          | 1            |
| 1YW14JAH1  | 9357          | 1            |
| 1YW14JANCN | 9359          | 2            |
| 1YW14JAT6  | 9357          | 1            |
| 1YW14JAXXN | 8669          | 1            |
| 1YW52LA    | 8604          | 1            |
| 1YW53LATS  | 9716          | 2            |
| 1YW59JAAL  | 8692          | 1            |
| 1YW59JACF  | 8625          | 1            |



| CCI        | ICD9CM | GRADE |
|------------|--------|-------|
| 1YW59JAGX  | 863    | 1     |
| 1YW80LA    | 8659   | 1     |
| 1YW80LAXXA | 8663   | 1     |
| 1YW80LAXXB | 8669   | 1     |
| 1YW87LA    | 863    | 1     |
| 1YX12ZZ    | 9999   | 3     |
| 1YX59JAGX  | 863    | 1     |
| 1YX59JAX7  | 8623   | 0     |
| 1YX87LA    | 8623   | 1     |
| 1YX89LA    | 8623   | 1     |
| 1YY54LAGX  | 8609   | 3     |
| 1YY54LANJ  | 3789   | 1     |
| 1YY54LANM  | 3799   | 0     |
| 1YY55LANJ  | 8609   | 3     |
| 1YY80LA    | 3779   | 2     |
| 1YY87LA    | 8622   | 2     |
| 1YY89LA    | 3779   | 2     |
| 1YZ12JADQ  | 9982   | 0     |
| 1YZ12JAMS  | 9359   | 1     |
| 1YZ14JAFJ  | 9357   | 1     |
| 1YZ14JAFN  | 9357   | 1     |
| 1YZ14JAGN  | 9356   | 1     |
| 1YZ14JAH1  | 9357   | 1     |
| 1YZ14JANCN | 9359   | 2     |
| 1YZ14JAT6  | 9357   | 1     |
| 1YZ14JAXXN | 8669   | 1     |
| 1YZ37JAFJ  | 9999   | 3     |
| 1YZ52HA    | 8601   | 1     |
| 1YZ52LA    | 8604   | 0     |
| 1YZ55JAFF  | 9738   | 0     |
| 1YZ58LAXXB | 8691   | 0     |
| 1YZ80LA    | 8659   | 1     |
| 1YZ87LA    | 863    | 1     |
| 1ZX02YD    | 9312   | 0     |
| 1ZX06JAGH  | 9981   | 1     |
| 1ZX06JAKL  | 9981   | 1     |
| 1ZX07JAKK  | 9335   | 2     |
| 1ZX10HA    | 9992   | 0     |
| 1ZZ11ALP1  | 9929   | 3     |
| 1ZZ11CAP1  | 9999   | 3     |
| 1ZZ11HAP1  | 9929   | 3     |
| 1ZZ35CAA3  | 9999   | 3     |
| 1ZZ35CAB3  | 9929   | 0     |

| CCI       | ICD9CM | GRADE |
|-----------|--------|-------|
| 1ZZ35CAC1 | 9999   | 3     |
| 1ZZ35CAE2 | 9999   | 3     |
| 1ZZ35CAE3 | 9999   | 3     |
| 1ZZ35CAE7 | 9929   | 0     |
| 1ZZ35CAJ1 | 9999   | 3     |
| 1ZZ35CAJ2 | 9999   | 3     |
| 1ZZ35CAK0 | 9929   | 0     |
| 1ZZ35CAM2 | 9925   | 1     |
| 1ZZ35CAM5 | 9925   | 1     |
| 1ZZ35CAM6 | 9925   | 1     |
| 1ZZ35CAM9 | 9925   | 1     |
| 1ZZ35CAN5 | 9929   | 0     |
| 1ZZ35CAP2 | 9929   | 0     |
| 1ZZ35CAT9 | 9999   | 2     |
| 1ZZ35HA1C | 9910   | 2     |
| 1ZZ35HAA2 | 9929   | 0     |
| 1ZZ35HAA3 | 9929   | 1     |
| 1ZZ35HAA4 | 9929   | 1     |
| 1ZZ35HAB1 | 9917   | 1     |
| 1ZZ35HAB2 | 9929   | 0     |
| 1ZZ35HAB7 | 9929   | 0     |
| 1ZZ35HAC1 | 9919   | 1     |
| 1ZZ35HAC2 | 9929   | 1     |
| 1ZZ35HAD5 | 9929   | 0     |
| 1ZZ35HAD7 | 9929   | 1     |
| 1ZZ35HAE2 | 9929   | 1     |
| 1ZZ35HAE3 | 9929   | 1     |
| 1ZZ35HAE5 | 9929   | 1     |
| 1ZZ35HAE7 | 9929   | 0     |
| 1ZZ35HAE8 | 9929   | 0     |
| 1ZZ35HAF1 | 9929   | 0     |
| 1ZZ35HAJ2 | 9923   | 1     |
| 1ZZ35HAJ4 | 9929   | 0     |
| 1ZZ35HAK0 | 9922   | 1     |
| 1ZZ35HAK3 | 9921   | 1     |
| 1ZZ35HAK4 | 9921   | 1     |
| 1ZZ35HAK5 | 9929   | 0     |
| 1ZZ35HAK6 | 9929   | 0     |
| 1ZZ35HAK7 | 9929   | 0     |
| 1ZZ35HAK8 | 9929   | 0     |
| 1ZZ35HAK9 | 9929   | 0     |
| 1ZZ35HAL1 | 9921   | 1     |
| 1ZZ35HAL2 | 9929   | 0     |

| CCI       | ICD9CM | GRADE |
|-----------|--------|-------|
| 1ZZ35HAL6 | 9929   | 0     |
| 1ZZ35HAM0 | 9925   | 1     |
| 1ZZ35HAM1 | 9925   | 1     |
| 1ZZ35HAM2 | 9925   | 1     |
| 1ZZ35HAM3 | 9925   | 1     |
| 1ZZ35HAM4 | 9925   | 0     |
| 1ZZ35HAM5 | 9925   | 1     |
| 1ZZ35HAM6 | 9925   | 1     |
| 1ZZ35HAM9 | 9925   | 1     |
| 1ZZ35HAN1 | 9929   | 0     |
| 1ZZ35HAN3 | 9929   | 0     |
| 1ZZ35HAN5 | 9929   | 1     |
| 1ZZ35HAP2 | 9929   | 1     |
| 1ZZ35HAP5 | 9929   | 0     |
| 1ZZ35HAP6 | 9929   | 0     |
| 1ZZ35HAP7 | 9929   | 1     |
| 1ZZ35HAR5 | 9929   | 0     |
| 1ZZ35HAT2 | 9929   | 0     |
| 1ZZ35HAT9 | 9929   | 1     |
| 1ZZ35YAC2 | 9999   | 3     |
| 1ZZ35YAE4 | 9929   | 0     |
| 1ZZ35YAM1 | 9925   | 1     |
| 1ZZ35YAM5 | 9925   | 1     |
| 1ZZ35YAP2 | 9929   | 0     |
| 2AA71HA   | 0111   | 1     |
| 2AA71SE   | 0111   | 1     |
| 2AN24HAJA | 8914   | 2     |
| 2AN24JAJA | 8914   | 1     |
| 2AN28JAPL | 0118   | 1     |
| 2AN59ZZ   | 8918   | 1     |
| 2AN71SE   | 0113   | 1     |
| 2AN71SZ   | 0114   | 1     |
| 2AW71HA   | 0332   | 1     |
| 2AX13HA   | 0331   | 1     |
| 2AZ02AE   | 9411   | 0     |
| 2AZ02ZZ   | 9411   | 0     |
| 2AZ08AH   | 9402   | 0     |
| 2BB25JA   | 8915   | 1     |
| 2BR70LA   | 0419   | 2     |
| 2BS70LA   | 0419   | 2     |
| 2BT50HNJA | 8915   | 2     |
| 2BT50JAJA | 8915   | 0     |
| 2CQ24JAJA | 8911   | 0     |

| <b>CCI</b> | <b>ICD9CM</b> | <b>GRADE</b> |
|------------|---------------|--------------|
| 2CS71LA    | 1021          | 0            |
| 2CZ02ZZ    | 9502          | 2            |
| 2CZ58AT    | 9515          | 1            |
| 2DE70CA    | 1811          | 1            |
| 2EQ71HA    | 8321          | 1            |
| 2ET70BA    | 2121          | 1            |
| 2EY71BA    | 2211          | 1            |
| 2FA70BA    | 2911          | 1            |
| 2FA71BA    | 2912          | 2            |
| 2FC71LA    | 2722          | 1            |
| 2FG71LA    | 2724          | 1            |
| 2FH71LA    | 2724          | 1            |
| 2FJ71HA    | 2501          | 1            |
| 2FJ71LA    | 2502          | 1            |
| 2FP71HA    | 2611          | 1            |
| 2FU71HA    | 0611          | 1            |
| 2FX70BA    | 2911          | 1            |
| 2FX71BA    | 2912          | 1            |
| 2GE02FN    | 8939          | 0            |
| 2GE70BA    | 3142          | 1            |
| 2GE71BA    | 3143          | 1            |
| 2GJ70BA    | 3142          | 2            |
| 2GJ71BA    | 3144          | 1            |
| 2GJ71BR    | 3144          | 1            |
| 2GM70BA    | 3323          | 2            |
| 2GM71BA    | 3324          | 1            |
| 2GM71BP    | 3324          | 0            |
| 2GM71BR    | 3324          | 1            |
| 2GM71LA    | 3325          | 1            |
| 2GT21ZZ    | 8937          | 2            |
| 2GT70LA    | 3402          | 2            |
| 2GT71BA    | 3327          | 1            |
| 2GT71BP    | 3327          | 1            |
| 2GT71DA    | 3327          | 1            |
| 2GT71HA    | 3326          | 1            |
| 2GT71LA    | 3328          | 1            |
| 2GV71DA    | 3424          | 1            |
| 2GV71HA    | 3424          | 1            |
| 2GW70DA    | 3422          | 1            |
| 2GW71DA    | 3425          | 1            |
| 2GW71HA    | 3425          | 1            |
| 2GY70DA    | 3421          | 1            |
| 2GZ21EA    | 8937          | 1            |

| <b>CCI</b> | <b>ICD9CM</b> | <b>GRADE</b> |
|------------|---------------|--------------|
| 2GZ21EC    | 8937          | 1            |
| 2GZ21ED    | 8937          | 1            |
| 2GZ21EH    | 8937          | 1            |
| 2GZ29ZZ    | 8938          | 2            |
| 2GZ58TA    | 8938          | 2            |
| 2GZ58ZZ    | 8938          | 2            |
| 2HD71GP    | 3725          | 2            |
| 2HZ07NK    | 8945          | 2            |
| 2HZ07NL    | 8945          | 2            |
| 2HZ07NM    | 8945          | 2            |
| 2HZ07NR    | 8945          | 3            |
| 2HZ08EJ    | 8941          | 2            |
| 2HZ08EK    | 8944          | 2            |
| 2HZ21UD    | 8968          | 1            |
| 2HZ24GPKL  | 3726          | 2            |
| 2HZ24GPKM  | 3726          | 2            |
| 2HZ24HAXJ  | 8952          | 1            |
| 2HZ24JAKE  | 8951          | 1            |
| 2HZ24JAKH  | 8950          | 1            |
| 2HZ24JAXJ  | 8952          | 1            |
| 2HZ29ZZ    | 8959          | 1            |
| 2IM28GPPL  | 8963          | 2            |
| 2JX71DA    | 3821          | 2            |
| 2JX71GP    | 3821          | 1            |
| 2JX71LA    | 3821          | 1            |
| 2JY70GP    | 3822          | 1            |
| 2JZ70LA    | 3829          | 2            |
| 2KG28ZZ    | 8959          | 2            |
| 2KG70LA    | 3829          | 1            |
| 2KT70LA    | 3829          | 2            |
| 2LZ28GQPL  | 8961          | 1            |
| 2LZ28GRPL  | 8962          | 1            |
| 2MB71HA    | 4011          | 0            |
| 2MB71LA    | 4011          | 1            |
| 2MC71HA    | 4011          | 1            |
| 2MC71LA    | 4011          | 1            |
| 2MD71HA    | 4011          | 1            |
| 2MD71LA    | 4011          | 0            |
| 2ME71BP    | 4011          | 1            |
| 2ME71DA    | 4011          | 2            |
| 2ME71LA    | 4011          | 1            |
| 2MG71HA    | 4011          | 1            |
| 2MG71LA    | 4011          | 1            |

| CCI       | ICD9CM | GRADE |
|-----------|--------|-------|
| 2MJ71HA   | 4011   | 1     |
| 2MJ71LA   | 4011   | 1     |
| 2MK71HA   | 4011   | 1     |
| 2MK71LA   | 4011   | 1     |
| 2NA02ZZ   | 8939   | 0     |
| 2NA58TA   | 8939   | 2     |
| 2NA70BA   | 4223   | 2     |
| 2NA71BA   | 4224   | 1     |
| 2NA71BP   | 4224   | 1     |
| 2NA71BR   | 4224   | 1     |
| 2NA71DA   | 4224   | 1     |
| 2NF70BA   | 4413   | 1     |
| 2NF70BN   | 4413   | 2     |
| 2NF71BA   | 4414   | 1     |
| 2NF71BP   | 4414   | 1     |
| 2NF71BR   | 4414   | 1     |
| 2NF71DA   | 4414   | 1     |
| 2NF71LA   | 4415   | 1     |
| 2NK70BA   | 4513   | 0     |
| 2NK70BABJ | 4513   | 2     |
| 2NK70BABL | 4513   | 2     |
| 2NK70BCBK | 4513   | 2     |
| 2NK70BN   | 4513   | 0     |
| 2NK70BNBL | 4513   | 2     |
| 2NK70DA   | 4511   | 1     |
| 2NK70LA   | 5411   | 2     |
| 2NK71BA   | 4514   | 0     |
| 2NK71BABJ | 4514   | 2     |
| 2NK71BABL | 4514   | 2     |
| 2NK71BR   | 4514   | 0     |
| 2NK71BRBL | 4514   | 2     |
| 2NK71BSBK | 4514   | 2     |
| 2NK71LA   | 4515   | 1     |
| 2NM70BA   | 4522   | 0     |
| 2NM70BABG | 4523   | 2     |
| 2NM70BABH | 4523   | 2     |
| 2NM70BABJ | 4523   | 2     |
| 2NM70BN   | 4522   | 0     |
| 2NM70BNBH | 4523   | 2     |
| 2NM70BNBJ | 4522   | 0     |
| 2NM70DA   | 4521   | 1     |
| 2NM70LA   | 5411   | 2     |
| 2NM71BABH | 4525   | 2     |

| CCI       | ICD9CM | GRADE |
|-----------|--------|-------|
| 2NM71BABJ | 4525   | 2     |
| 2NM71BR   | 4522   | 0     |
| 2NM71BRBH | 4525   | 2     |
| 2NM71BRBJ | 4525   | 2     |
| 2NM71DA   | 4525   | 1     |
| 2NQ70BA   | 4823   | 2     |
| 2NQ70CA   | 8934   | 1     |
| 2NQ71BA   | 4824   | 1     |
| 2NQ71BG   | 4824   | 1     |
| 2NQ71BR   | 4824   | 1     |
| 2NQ71CA   | 4824   | 1     |
| 2NT70BA   | 4921   | 0     |
| 2NT70JA   | 8934   | 0     |
| 2NT71BA   | 4923   | 1     |
| 2NT71LA   | 4923   | 1     |
| 2OA71DA   | 5011   | 1     |
| 2OA71GR   | 5011   | 2     |
| 2OA71HA   | 5011   | 1     |
| 2OA71LA   | 5012   | 1     |
| 2OB71HA   | 4132   | 1     |
| 2OE70BA   | 5111   | 2     |
| 2OE71BA   | 5114   | 1     |
| 2OE71DA   | 5114   | 1     |
| 2OJ71BA   | 5211   | 1     |
| 2OJ71HA   | 5211   | 1     |
| 2OT70DA   | 5421   | 1     |
| 2OT70LA   | 5411   | 1     |
| 2OT71DA   | 5423   | 2     |
| 2OT71HA   | 5424   | 2     |
| 2OT71LA   | 5423   | 2     |
| 2PB71HA   | 0711   | 1     |
| 2PC71HA   | 5523   | 1     |
| 2PE71HA   | 5523   | 0     |
| 2PG70BA   | 5631   | 1     |
| 2PG71BA   | 5633   | 1     |
| 2PM58TA   | 8929   | 2     |
| 2PM58VD   | 8929   | 0     |
| 2PM58VE   | 8929   | 2     |
| 2PM58VF   | 8929   | 2     |
| 2PM58VG   | 8924   | 1     |
| 2PM58VH   | 8922   | 1     |
| 2PM70BA   | 5732   | 2     |
| 2PM71BA   | 5733   | 1     |

| CCI       | ICD9CM | GRADE |
|-----------|--------|-------|
| 2PM71DA   | 5733   | 1     |
| 2PM71LA   | 5734   | 0     |
| 2PQ70BA   | 5822   | 1     |
| 2QE71LA   | 6411   | 1     |
| 2QT70CA   | 8939   | 3     |
| 2QT71BA   | 6011   | 1     |
| 2QT71HA   | 6011   | 1     |
| 2RM70CA   | 6812   | 2     |
| 2RM71BA   | 6816   | 1     |
| 2RM71BR   | 6959   | 1     |
| 2RM71CR   | 6816   | 1     |
| 2RM71LA   | 6813   | 1     |
| 2RN71CG   | 6712   | 2     |
| 2RN71CQ   | 6712   | 2     |
| 2RN71CR   | 6712   | 2     |
| 2RS70CA   | 7021   | 2     |
| 2RW71HA   | 7111   | 1     |
| 2RW71LA   | 7111   | 1     |
| 2RY71LA   | 8611   | 1     |
| 2RZ02CA   | 8926   | 1     |
| 2RZ02JA   | 8926   | 0     |
| 2SC71HA   | 7749   | 1     |
| 2SC71PF   | 7749   | 1     |
| 2SF71HA   | 7749   | 1     |
| 2SH71HA   | 8321   | 1     |
| 2SL71HA   | 7741   | 0     |
| 2SQ71LA   | 7749   | 1     |
| 2SW71HA   | 7749   | 1     |
| 2SZ71HA   | 8321   | 1     |
| 2TA70LA   | 8011   | 1     |
| 2TA71LA   | 8031   | 1     |
| 2TK71LA   | 7742   | 1     |
| 2TM70LA   | 8012   | 1     |
| 2TM71HA   | 8032   | 1     |
| 2TM71LA   | 8032   | 1     |
| 2TV71LA   | 7743   | 0     |
| 2TX70LA   | 8309   | 1     |
| 2TX71HA   | 8321   | 1     |
| 2TZ24HAJA | 9308   | 1     |
| 2UB71HA   | 8033   | 1     |
| 2UL71HA   | 8034   | 1     |
| 2UY71LA   | 8321   | 1     |
| 2VA08ZZ   | 9305   | 2     |



| CCI       | ICD9CM | GRADE |
|-----------|--------|-------|
| 2VA70DA   | 8025   | 0     |
| 2VA70LA   | 8015   | 1     |
| 2VA71DA   | 8035   | 0     |
| 2VA71HA   | 8035   | 1     |
| 2VA71LA   | 8035   | 1     |
| 2VC71HA   | 7745   | 1     |
| 2VC71LA   | 7745   | 1     |
| 2VG08ZZ   | 9305   | 2     |
| 2VG70LA   | 8016   | 1     |
| 2VG71HA   | 8036   | 1     |
| 2VX70LA   | 8309   | 1     |
| 2VX71HA   | 8321   | 1     |
| 2VX71LA   | 8321   | 1     |
| 2VZ24HAJA | 9308   | 1     |
| 2WA08ZZ   | 9305   | 2     |
| 2WA71HA   | 8037   | 1     |
| 2WS71LA   | 7748   | 0     |
| 2WV71HA   | 8321   | 1     |
| 2WY71HA   | 4131   | 1     |
| 2YA71HA   | 8611   | 1     |
| 2YA71LA   | 8611   | 1     |
| 2YB71HA   | 8611   | 1     |
| 2YB71LA   | 8611   | 1     |
| 2YC71HA   | 1812   | 1     |
| 2YC71LA   | 8611   | 0     |
| 2YD71HA   | 2122   | 1     |
| 2YD71LA   | 2122   | 1     |
| 2YE71HA   | 2723   | 1     |
| 2YE71LA   | 2723   | 1     |
| 2YF71HA   | 8611   | 1     |
| 2YF71LA   | 8611   | 1     |
| 2YG71HA   | 8611   | 1     |
| 2YG71LA   | 8611   | 1     |
| 2YK71HA   | 8511   | 1     |
| 2YK71LA   | 8512   | 1     |
| 2YM71HA   | 8511   | 1     |
| 2YM71HAGX | 8511   | 1     |
| 2YM71LA   | 8512   | 1     |
| 2YR71HA   | 8611   | 1     |
| 2YR71LA   | 8611   | 1     |
| 2YS71HA   | 8611   | 1     |
| 2YS71LA   | 8611   | 1     |
| 2YT71HA   | 8611   | 1     |

| CCI     | ICD9CM | GRADE |
|---------|--------|-------|
| 2YT71LA | 8611   | 1     |
| 2YU71HA | 8611   | 0     |
| 2YU71LA | 8611   | 1     |
| 2YV71HA | 8611   | 1     |
| 2YV71LA | 8611   | 1     |
| 2YW71HA | 8611   | 1     |
| 2ZZ02QP | 9309   | 0     |
| 2ZZ02ZR | 9309   | 0     |
| 2ZZ02ZS | 8939   | 0     |
| 2ZZ02ZU | 8939   | 0     |
| 2ZZ02ZV | 9309   | 0     |
| 2ZZ02ZX | 897    | 2     |
| 2ZZ02ZZ | 897    | 2     |
| 2ZZ03ZZ | 9999   | 3     |
| 2ZZ08MU | 8939   | 2     |
| 2ZZ13RA | 3899   | 0     |
| 2ZZ13RE | 3898   | 1     |
| 3AF10VA | 8717   | 0     |
| 3AF40WA | 8897   | 2     |
| 3AF40WC | 8897   | 2     |
| 3AN20WA | 8703   | 1     |
| 3AN20WC | 8703   | 1     |
| 3AN20WE | 8703   | 1     |
| 3AN30DA | 8871   | 2     |
| 3AN40WA | 8891   | 1     |
| 3AN40WC | 8891   | 1     |
| 3AN40WE | 8891   | 1     |
| 3AN70CC | 9211   | 1     |
| 3AN94ZA | 8890   | 2     |
| 3AN94ZB | 8890   | 2     |
| 3AN94ZC | 8890   | 2     |
| 3AW10VM | 8721   | 1     |
| 3AW30DA | 8879   | 2     |
| 3AW94ZA | 8890   | 2     |
| 3CA18VA | 8716   | 2     |
| 3CA20WA | 8703   | 2     |
| 3CA20WE | 8703   | 2     |
| 3CA40WA | 8897   | 2     |
| 3DR20WA | 8703   | 2     |
| 3DR40WA | 8897   | 2     |
| 3DR40WE | 8897   | 2     |
| 3DZ94ZA | 8890   | 2     |
| 3EA10VA | 8717   | 0     |

| <b>CCI</b> | <b>ICD9CM</b> | <b>GRADE</b> |
|------------|---------------|--------------|
| 3EA20WA    | 8703          | 2            |
| 3EA20WC    | 8703          | 2            |
| 3EA20WE    | 8703          | 2            |
| 3EL20WA    | 8703          | 2            |
| 3EQ30VA    | 8871          | 1            |
| 3ER20WA    | 8703          | 1            |
| 3ER20WC    | 8703          | 1            |
| 3ER20WE    | 8703          | 1            |
| 3ER40WA    | 8897          | 2            |
| 3ER40WC    | 8897          | 2            |
| 3ER40WE    | 8897          | 2            |
| 3EY20WA    | 8703          | 2            |
| 3EY20WE    | 8703          | 0            |
| 3FU30VA    | 8709          | 2            |
| 3FU70CA    | 9201          | 1            |
| 3FV70CC    | 8897          | 0            |
| 3FX12AY    | 8709          | 2            |
| 3FY20VA    | 8703          | 0            |
| 3FY20VC    | 8703          | 0            |
| 3FY20VZ    | 8703          | 0            |
| 3FY20WA    | 8838          | 2            |
| 3FY20WC    | 8838          | 2            |
| 3FY20WE    | 8703          | 0            |
| 3FY30VA    | 8871          | 1            |
| 3FY40WA    | 8897          | 2            |
| 3FY40WC    | 8897          | 2            |
| 3GT10VA    | 8749          | 2            |
| 3GT20SZ    | 8741          | 0            |
| 3GT20WA    | 8741          | 2            |
| 3GT20WC    | 8741          | 2            |
| 3GT20WE    | 8741          | 2            |
| 3GT70CA    | 9215          | 1            |
| 3GT70CC    | 9215          | 1            |
| 3GT70CE    | 9215          | 1            |
| 3GT70KC    | 9215          | 1            |
| 3GT70KD    | 9215          | 1            |
| 3GT70KE    | 9215          | 1            |
| 3GY10VA    | 8744          | 2            |
| 3GY10VV    | 8733          | 2            |
| 3GY18VZ    | 8742          | 1            |
| 3GY20WA    | 8741          | 1            |
| 3GY20WC    | 8741          | 1            |
| 3GY20WE    | 8741          | 1            |

| <b>CCI</b> | <b>ICD9CM</b> | <b>GRADE</b> |
|------------|---------------|--------------|
| 3GY30DA    | 8873          | 1            |
| 3GY40WA    | 8892          | 2            |
| 3GY40WC    | 8892          | 2            |
| 3HZ12VA    | 8749          | 2            |
| 3HZ30GP    | 8872          | 0            |
| 3ID10VC    | 8842          | 1            |
| 3ID10VX    | 8842          | 1            |
| 3ID10VY    | 8842          | 1            |
| 3ID12VA    | 8749          | 2            |
| 3ID20WA    | 8842          | 1            |
| 3ID20WC    | 8842          | 1            |
| 3ID20WE    | 8842          | 1            |
| 3ID30DA    | 8873          | 2            |
| 3ID30DC    | 8873          | 2            |
| 3ID30HA    | 8873          | 2            |
| 3IM10VC    | 8843          | 1            |
| 3IM10VX    | 8843          | 1            |
| 3IP10VC    | 8852          | 2            |
| 3IP10VX    | 8853          | 2            |
| 3IP10VY    | 8854          | 2            |
| 3IP20WA    | 8741          | 2            |
| 3IP20WC    | 8741          | 2            |
| 3IP20WE    | 8741          | 2            |
| 3IP30DA    | 8872          | 1            |
| 3IP30DB    | 8872          | 1            |
| 3IP30DC    | 8872          | 1            |
| 3IP30DD    | 8872          | 1            |
| 3IP30HA    | 8872          | 1            |
| 3IP30HB    | 8872          | 1            |
| 3IP30HD    | 8872          | 1            |
| 3IP40WA    | 8897          | 2            |
| 3IP40WC    | 8897          | 2            |
| 3IP70CC    | 9205          | 2            |
| 3IP70CE    | 9205          | 2            |
| 3IP70KG    | 9205          | 2            |
| 3IP70KP    | 9205          | 2            |
| 3IS10VA    | 8749          | 1            |
| 3IS10VC    | 8851          | 1            |
| 3IS12VA    | 8851          | 2            |
| 3JE10VA    | 8841          | 2            |
| 3JE10VX    | 8841          | 1            |
| 3JE20WC    | 8703          | 1            |
| 3JE20WE    | 8703          | 1            |

| <b>CCI</b> | <b>ICD9CM</b> | <b>GRADE</b> |
|------------|---------------|--------------|
| 3JE30DA    | 8871          | 1            |
| 3JE30DB    | 8871          | 1            |
| 3JE30DC    | 8871          | 1            |
| 3JE30DD    | 8871          | 1            |
| 3JE40WA    | 8897          | 2            |
| 3JE40WC    | 8897          | 2            |
| 3JG10VX    | 8841          | 1            |
| 3JG30DA    | 8879          | 2            |
| 3JG30DC    | 8879          | 2            |
| 3JG30DD    | 8872          | 0            |
| 3JM10VX    | 8849          | 2            |
| 3JM30DA    | 8849          | 2            |
| 3JM30DC    | 8849          | 2            |
| 3JM30DD    | 8849          | 2            |
| 3JM40WA    | 8897          | 2            |
| 3JQ12VA    | 8709          | 0            |
| 3JQ30DA    | 8871          | 2            |
| 3JS10VC    | 8849          | 2            |
| 3JU10VA    | 8867          | 2            |
| 3JU10VC    | 8867          | 2            |
| 3JU12VA    | 8867          | 2            |
| 3JU30DA    | 8877          | 2            |
| 3JU30DC    | 8877          | 2            |
| 3JU30DD    | 8877          | 0            |
| 3JW10VA    | 8861          | 2            |
| 3JW10VC    | 8861          | 1            |
| 3JW10VX    | 8702          | 0            |
| 3JX20WC    | 8838          | 1            |
| 3JX20WE    | 8838          | 1            |
| 3JX40WA    | 8897          | 2            |
| 3JX40WC    | 8897          | 2            |
| 3JX40WE    | 8897          | 2            |
| 3JY12VA    | 8749          | 0            |
| 3JY20WC    | 8838          | 2            |
| 3JY20WE    | 8838          | 2            |
| 3JY30DA    | 8873          | 2            |
| 3JY40WA    | 8897          | 2            |
| 3KC10VX    | 8845          | 1            |
| 3KE10VA    | 8847          | 2            |
| 3KE10VX    | 8847          | 1            |
| 3KE20WC    | 8801          | 1            |
| 3KE20WE    | 8801          | 1            |
| 3KE40WE    | 8897          | 2            |

| <b>CCI</b> | <b>ICD9CM</b> | <b>GRADE</b> |
|------------|---------------|--------------|
| 3KG10VA    | 8848          | 2            |
| 3KG10VX    | 8848          | 2            |
| 3KG12VA    | 8848          | 2            |
| 3KG20WC    | 8838          | 1            |
| 3KG20WE    | 8838          | 1            |
| 3KG30DA    | 8877          | 2            |
| 3KG30DB    | 8877          | 2            |
| 3KG30DC    | 8877          | 2            |
| 3KG30DD    | 8877          | 2            |
| 3KG40WC    | 8894          | 0            |
| 3KQ10VC    | 8865          | 1            |
| 3KQ30DA    | 8876          | 2            |
| 3KQ30DC    | 8876          | 2            |
| 3KR10VA    | 8866          | 2            |
| 3KR10VC    | 8866          | 1            |
| 3KR30DA    | 8877          | 2            |
| 3KR30DB    | 8877          | 2            |
| 3KR30DC    | 8877          | 2            |
| 3KR30DD    | 8877          | 2            |
| 3KT10VC    | 8867          | 1            |
| 3KT10VX    | 8849          | 2            |
| 3KT20WC    | 8838          | 1            |
| 3KT20WE    | 8838          | 1            |
| 3KT30DA    | 8879          | 2            |
| 3KT40WA    | 8897          | 2            |
| 3KV10VX    | 8849          | 2            |
| 3KX10VC    | 8860          | 1            |
| 3KX30DA    | 8879          | 0            |
| 3KX30DC    | 8879          | 2            |
| 3KY10VA    | 8840          | 2            |
| 3KY10VC    | 8840          | 1            |
| 3KY30DC    | 8879          | 2            |
| 3KY30DD    | 8879          | 0            |
| 3LZ70PD    | 9205          | 2            |
| 3LZ70PR    | 9205          | 2            |
| 3LZ70PS    | 8897          | 0            |
| 3NA10VN    | 8761          | 0            |
| 3NA12AY    | 8769          | 2            |
| 3NA12VA    | 8769          | 2            |
| 3NK10WG    | 8765          | 1            |
| 3NL10VN    | 8762          | 2            |
| 3NM10VN    | 8764          | 2            |
| 3NM20WA    | 8801          | 2            |

| <b>CCI</b> | <b>ICD9CM</b> | <b>GRADE</b> |
|------------|---------------|--------------|
| 3NM20WC    | 8801          | 2            |
| 3NZ10VN    | 8769          | 2            |
| 3NZ70CA    | 9204          | 1            |
| 3OA10WX    | 8819          | 2            |
| 3OA30DA    | 8876          | 2            |
| 3OA70CC    | 9202          | 1            |
| 3OD70CA    | 9219          | 2            |
| 3OE10WG    | 8754          | 1            |
| 3OE10WX    | 8754          | 1            |
| 3OE10WZ    | 5211          | 1            |
| 3OE10XA    | 8754          | 1            |
| 3OG10WX    | 5110          | 2            |
| 3OG10WZ    | 5110          | 2            |
| 3OJ10WZ    | 5213          | 1            |
| 3OT10VA    | 8819          | 2            |
| 3OT10VZ    | 8811          | 2            |
| 3OT10WG    | 8803          | 0            |
| 3OT12VA    | 8819          | 1            |
| 3OT20WA    | 8801          | 1            |
| 3OT20WC    | 8801          | 1            |
| 3OT20WE    | 8801          | 1            |
| 3OT30DA    | 8876          | 1            |
| 3OT30DC    | 8876          | 1            |
| 3OT30DD    | 8876          | 1            |
| 3OT30HA    | 8876          | 1            |
| 3OT30LA    | 8876          | 0            |
| 3OT40WA    | 8897          | 2            |
| 3OT40WC    | 8897          | 2            |
| 3OT40WE    | 8897          | 2            |
| 3OZ94AY    | 8890          | 2            |
| 3PC10VC    | 8779          | 2            |
| 3PC12VA    | 8779          | 2            |
| 3PC12VZ    | 8769          | 0            |
| 3PC20WA    | 8771          | 1            |
| 3PC20WC    | 8771          | 1            |
| 3PC20WE    | 8771          | 1            |
| 3PC30DA    | 8875          | 1            |
| 3PC30DC    | 8875          | 0            |
| 3PC30DD    | 8875          | 1            |
| 3PC40WA    | 8897          | 2            |
| 3PC40WC    | 8897          | 2            |
| 3PC70TF    | 9219          | 2            |
| 3PH10VA    | 8779          | 2            |

| CCI     | ICD9CM | GRADE |
|---------|--------|-------|
| 3PH10XJ | 8774   | 2     |
| 3PH12XJ | 8779   | 2     |
| 3PM10WN | 8777   | 0     |
| 3PM10XJ | 8774   | 2     |
| 3PM30DA | 8875   | 1     |
| 3PQ10XJ | 8779   | 1     |
| 3PS10VA | 8779   | 1     |
| 3PZ12VA | 8779   | 0     |
| 3PZ20WA | 8771   | 2     |
| 3PZ20WC | 8771   | 2     |
| 3QG30DA | 8879   | 2     |
| 3QG30DD | 8879   | 2     |
| 3QT30DF | 8876   | 0     |
| 3RZ30LA | 8879   | 0     |
| 3RZ94ZA | 8890   | 2     |
| 3SC10VA | 8729   | 0     |
| 3SC12AY | 8729   | 2     |
| 3SC12VA | 8729   | 2     |
| 3SC20WA | 8838   | 2     |
| 3SC20WC | 8838   | 2     |
| 3SC20WE | 8838   | 2     |
| 3SC40WA | 8893   | 1     |
| 3SC40WC | 8893   | 1     |
| 3SC40WE | 8893   | 1     |
| 3SF10VA | 8724   | 0     |
| 3SF12VA | 8724   | 1     |
| 3SF20WA | 8838   | 2     |
| 3SF20WC | 8838   | 0     |
| 3SF40WA | 8897   | 2     |
| 3SF40WC | 8893   | 0     |
| 3SF40WE | 8897   | 2     |
| 3SL10VA | 8743   | 0     |
| 3SQ10VA | 8826   | 1     |
| 3SQ10VN | 8826   | 1     |
| 3SQ12VA | 8826   | 1     |
| 3SQ18VA | 8826   | 1     |
| 3TA10VA | 8821   | 0     |
| 3TA12VA | 8821   | 2     |
| 3TA30VA | 8879   | 2     |
| 3TK10VA | 8821   | 1     |
| 3TK12VA | 8821   | 1     |
| 3TM10VA | 8822   | 0     |
| 3TM12VA | 8822   | 2     |



| CCI     | ICD9CM | GRADE |
|---------|--------|-------|
| 3TV10VA | 8824   | 0     |
| 3TV12VA | 8822   | 1     |
| 3TZ10VZ | 8824   | 1     |
| 3TZ12VA | 8824   | 1     |
| 3TZ18VA | 8824   | 1     |
| 3TZ20WA | 8838   | 2     |
| 3TZ20WC | 8838   | 2     |
| 3TZ20WE | 8838   | 2     |
| 3TZ30DA | 8879   | 2     |
| 3TZ40WA | 8894   | 2     |
| 3TZ40WE | 8894   | 2     |
| 3UB10VA | 8823   | 1     |
| 3UB12VA | 8823   | 2     |
| 3UL12VA | 8823   | 0     |
| 3UZ12VA | 8823   | 2     |
| 3UZ94ZA | 8890   | 2     |
| 3VA10KM | 8826   | 1     |
| 3VA10VA | 8826   | 1     |
| 3VA10VL | 8832   | 2     |
| 3VA12VA | 8826   | 1     |
| 3VA12VL | 8826   | 1     |
| 3VA30DA | 8879   | 2     |
| 3VA70CA | 9219   | 2     |
| 3VA70CC | 8894   | 0     |
| 3VA94ZA | 8890   | 2     |
| 3VA94ZB | 8890   | 2     |
| 3VC10VA | 8827   | 1     |
| 3VC12VA | 8827   | 1     |
| 3VC94ZB | 8890   | 2     |
| 3VG10VA | 8827   | 1     |
| 3VG12VA | 8827   | 2     |
| 3VG30DA | 8879   | 2     |
| 3VQ10VA | 8827   | 1     |
| 3VQ12VA | 8827   | 1     |
| 3VZ10VA | 8829   | 1     |
| 3VZ10VZ | 8829   | 1     |
| 3VZ12VA | 8829   | 1     |
| 3VZ18VA | 8829   | 1     |
| 3VZ20WA | 8838   | 2     |
| 3VZ20WC | 8838   | 2     |
| 3VZ20WE | 8838   | 2     |
| 3VZ30DA | 8879   | 2     |
| 3VZ40WA | 8894   | 2     |

| CCI     | ICD9CM | GRADE |
|---------|--------|-------|
| 3VZ40WC | 8894   | 2     |
| 3VZ40WE | 8894   | 2     |
| 3WA10KM | 8828   | 1     |
| 3WA10VA | 8828   | 0     |
| 3WA12VA | 8828   | 1     |
| 3WG10VA | 8828   | 0     |
| 3WY70CA | 9205   | 1     |
| 3WY70CC | 9205   | 1     |
| 3WZ10VA | 8831   | 1     |
| 3WZ20WA | 8838   | 2     |
| 3WZ20WC | 8838   | 2     |
| 3WZ20WE | 8838   | 2     |
| 3WZ70CA | 9219   | 2     |
| 3WZ70CC | 9219   | 2     |
| 3WZ70CE | 8894   | 0     |
| 3WZ70CG | 9219   | 2     |
| 3YM10SZ | 8735   | 0     |
| 3YM10VA | 8736   | 2     |
| 3YM30DA | 8873   | 2     |
| 3YM30SZ | 8873   | 0     |
| 3ZZ20WA | 8838   | 3     |
| 3ZZ20WC | 8838   | 3     |
| 3ZZ20WE | 8838   | 3     |
| 3ZZ40WA | 8897   | 2     |
| 3ZZ40WC | 8897   | 2     |
| 3ZZ70CA | 8897   | 0     |
| 3ZZ70CC | 9219   | 2     |
| 3ZZ70CE | 9219   | 2     |
| 6AA02CM | 9411   | 0     |
| 6AA02CP | 9411   | 0     |
| 6KA02ME | 9408   | 0     |
| 6VA30TV | 9389   | 0     |
| 6VA30ZZ | 9389   | 0     |
| 6VA50TP | 9389   | 0     |
| 6VA50TT | 9389   | 0     |
| 6VA50ZZ | 9389   | 0     |
| 7SC01TA | 9999   | 3     |
| 7SC08PK | 9999   | 3     |
| 7SC08PL | 9999   | 3     |
| 7SC59QH | 9389   | 3     |
| 7SC59ZZ | 9389   | 3     |
| 7SC70SB | 9999   | 3     |
| 7SC70SC | 9999   | 3     |

| <b>CCI</b> | <b>ICD9CM</b> | <b>GRADE</b> |
|------------|---------------|--------------|
| 7SF13ZZ    | 9999          | 3            |
| 7SF18KB    | 247           | 2            |
| 7SP10VD    | 9449          | 2            |
| 8HM70HABP1 | 9952          | 0            |
| 8IN70HABA  | 9952          | 0            |
| 8IN70HABC  | 9952          | 1            |
| 8MK70HABK  | 9936          | 0            |
| 8MM70HABM  | 9939          | 1            |
| 8TB70HBBF  | 9933          | 0            |
| 8ZZ70HABW  | 9959          | 1            |

| <b>CCP</b> | <b>ICD9CM</b> | <b>GRADE</b> |
|------------|---------------|--------------|
| 071        | 9311          | 0            |
| 072        | 9321          | 0            |
| 0746       | 9346          | 0            |
| 0759       | 9359          | 0            |
| 0783       | 9383          | 0            |
| 1164       | 9764          | 0            |
| 1303       | 9903          | 0            |
| 1304       | 9904          | 0            |
| 1359       | 9929          | 0            |
| 1366       | 9396          | 0            |
| 1372       | 9962          | 0            |
| 5091       | 3891          | 0            |
| 6994       | 5794          | 0            |
| 9041       | 7842          | 0            |
| 9054       | 7855          | 0            |
| 9110       | 7911          | 0            |
| 9114       | 7915          | 0            |
| 9134       | 7935          | 0            |
| 9224       | 8045          | 0            |
| 9369       | 8140          | 0            |

| ORIGINAL_ICD9CM | REVISED_ICD9CM | REVISION_YEAR |
|-----------------|----------------|---------------|
| 2387            | 23871          | 2006          |
| 2520            | 25200          | 2004          |
| 2554            | 25541          | 2007          |
| 2765            | 27650          | 2005          |
| 3311            | 33111          | 2003          |
| 2865            | 28652          | 2011          |
| 2880            | 28800          | 2006          |
| 3370            | 33700          | 2008          |
| 3483            | 34830          | 2003          |
| 3578            | 35781          | 2002          |
| 3580            | 35800          | 2003          |
| 3598            | 35981          | 2002          |
| 4582            | 45821          | 2003          |
| 494             | 4940           | 2000          |
| 5128            | 51289          | 2011          |
| 5163            | 51631          | 2011          |
| 5185            | 51851          | 2011          |
| 5302            | 53020          | 2003          |
| 5640            | 56400          | 2001          |
| 5672            | 56721          | 2005          |
| 585             | 5851           | 2005          |
| 5996            | 59960          | 2005          |
| 5997            | 59970          | 2008          |
| 600             | 6003           | 2000          |
| 6188            | 61881          | 2004          |
| 7070            | 70700          | 2004          |
| 7071            | 70710          | 2000          |
| 71970           | 7197           | 2003          |
| 7299            | 72999          | 2008          |
| 7806            | 78060          | 2008          |
| 7809            | 78099          | 2002          |
| 7819            | 78191          | 2000          |
| 7872            | 78720          | 2007          |
| 7895            | 78951          | 2007          |
| 7990            | 79901          | 2005          |
| 7992            | 79921          | 2009          |
| 7998            | 79981          | 2003          |
| 9591            | 95911          | 2003          |
| 9952            | 99520          | 2006          |
| 9964            | 99640          | 2005          |
| 9973            | 99731          | 2008          |
| 9974            | 99741          | 2011          |
| 9980            | 99800          | 2011          |

| ORIGINAL_ICD9CM | REVISED_ICD9CM | REVISION_YEAR |
|-----------------|----------------|---------------|
| 9983            | 99830          | 2002          |
| V540            | V5401          | 2003          |
| V548            | V5481          | 2002          |
| V581            | V5811          | 2005          |
| V583            | V5830          | 2006          |
| V584            | V5841          | 1994          |
| V608            | V6089          | 2009          |
| V670            | V6700          | 2000          |
| V718            | V7181          | 2000          |
| 2848            | 2841           | 2006          |
| 8200            | 82000          | 2000          |
| 8202            | 82020          | 2000          |
| 9983            | 99831          | 2002          |
| V578            | V5781          | 2000          |
| V588            | V5881          | 1994          |
| 07989           | 07982          | 2003          |
